# Supplementary material for: The Awareness of the International Veterinary Profession of Evidence-Based Veterinary Medicine and Preferred Methods of Training
Source: MDPI journal article supplement (doi:10.3390/vetsci4010015), 2017-03-08
Supplement: s2 [file s2]

## Sheet: Data
ConsecID	clinician	workdeveloped	workinuk	countryofwork	gender	yrsgrad	age	pgqual	findmoreevm	hourscpd	paycpdprac	paycpdmyself	paycpdoth	firstchoicecpdmeth	secchoicecpdmeth	thirdchoicecpdmeth	questionnaire	heardEVM	yrsgradcat	whereheardevm_origincats	whereheardevmcode_mergedcats	WhereHeardOfQuesttionnaire	TypeWorkText
2	1	1	1	UK	0	42	65	1	0	35	0	1	0	0	1	2	0	1	3	PG or specialist study or personal research	4	11	Private
3	1	1	1	UK	1	4	25	0	0	40	0	1	0	0	1	2	0	1	1	University or Vet School	7	11	Private
6	1	1	1	UK	1	4	28	1	1	999999999	0	0	0	999999999	999999999	999999999	0	1	1	Publications, literature or journals	6	11	PrivateUni
7	1	1	1	UK	1	3	26	0	0	999999999	0	0	0	999999999	999999999	999999999	0	0	1	0	999999999	11	Private
8	1	1	1	UK	1	15	39	0	0	25	0	1	0	0	1	5	0	1	2	Publications, literature or journals	6	11	Private
9	1	1	1	UK	1	2	28	1	1	999999999	0	0	0	999999999	999999999	999999999	0	1	1	0	999999999	11	Private
11	0	1	1	UK	1	23	46	1	0	60	0	1	0	2	7	9	0	1	3	Publications, literature or journals	6	11	IndustryPublicOutsideBreak
13	0	1	1	UK	1	1	26	0	0	999999999	0	0	0	999999999	999999999	999999999	0	0	1	0	999999999	11	Public
17	0	1	1	UK	1	2	33	0	0	40	1	1	0	0	4	1	0	1	1	Publications, literature or journals	6	11	PrivateResearch
18	1	1	1	UK	1	5	30	1	0	70	1	1	0	1	2	4	0	1	1	Publications, literature or journals	6	11	Private
21	0	1	1	UK	1	7	33	1	2	50	1	1	0	1	0	9	0	0	1	0	999999999	11	PrivateCharity
23	1	1	1	UK	1	2	25	0	999999999	100	1	1	0	1	0	9	0	0	1	0	999999999	11	Private
25	1	1	1	UK	0	8	33	0	0	20	0	1	0	0	2	7	0	0	2	0	999999999	11	PrivateIndustry
27	1	1	1	UK	0	10	34	0	2	20	1	0	0	1	0	9	0	1	2	CPD, Conferences, meetings, seminars or lectures	2	11	Private
28	1	1	1	UK	0	999999999	999999999	1	0	60	0	1	0	0	2	1	0	1	999999999	Ubiquitous or various and multiple sources	1	11	Private
29	1	1	1	UK	1	6	32	0	0	40	0	1	0	0	1	5	0	0	1	0	999999999	11	Private
30	1	1	1	UK	0	25	48	1	0	100	0	1	0	0	3	2	0	0	3	0	999999999	11	Private
31	0	1	1	UK	0	34	56	1	0	20	0	1	1	0	1	999999999	0	0	3	0	999999999	11	Gov
32	1	1	1	UK	1	19	41	1	0	40	0	1	0	0	5	8	0	1	2	Publications, literature or journals	6	11	Private
33	1	1	1	UK	1	17	38	1	0	30	1	0	0	0	4	6	0	1	2	PG or specialist study or personal research	4	11	PrivatePublic
34	1	1	1	UK	1	8	30	0	0	60	1	0	0	0	1	4	0	0	2	0	999999999	11	Private
35	1	1	1	UK	0	5	34	0	0	20	0	1	0	0	4	1	0	1	1	Publications, literature or journals	6	11	PrivatePublic
36	1	1	1	UK	1	5	28	0	2	35	0	1	0	2	0	1	0	0	1	0	999999999	11	Private
37	1	1	1	UK	1	5	29	0	0	50	1	1	1	0	1	9	0	1	1	University or Vet School	7	11	Private
38	0	1	1	UK	0	11	34	0	0	25	0	1	0	0	2	6	0	1	2	0	999999999	11	Research
39	1	1	1	UK	0	35	57	0	0	35	0	1	0	1	0	4	0	1	3	Publications, literature or journals	6	11	Private
40	1	1	1	UK	0	23	46	0	2	30	0	1	0	0	1	5	0	0	3	0	999999999	11	Private
41	1	1	1	UK	999999999	999999999	999999999	0	0	100	1	1	0	0	1	2	0	1	999999999	University or Vet School	7	11	Private
42	1	1	1	UK	1	3	26	0	2	35	1	0	0	0	9	7	0	0	1	0	999999999	11	Private
43	1	1	1	UK	0	1	28	0	2	100	0	0	1	0	0	9	0	1	1	0	999999999	11	Uni
44	1	1	1	UK	1	8	29	1	0	20	1	0	0	1	0	4	0	1	2	0	999999999	11	Private
45	0	1	1	UK	0	8	34	1	0	999999999	0	0	0	999999999	999999999	999999999	0	1	2	University or Vet School	7	11	Public
46	1	1	1	UK	1	19	42	1	0	735	0	1	0	0	2	4	0	1	2	Publications, literature or journals	6	11	Private
47	0	1	1	UK	1	4	35	0	0	50	0	1	0	0	8	9	0	0	1	0	999999999	11	Private
48	1	1	1	UK	0	2	25	1	0	999999999	0	0	0	999999999	999999999	999999999	0	0	1	0	999999999	11	Public
49	0	1	1	UK	0	20	45	0	0	35	0	1	0	6	5	0	0	1	2	Another discipline e.g. human medicine or science	1	11	Private
51	1	1	1	UK	1	1	25	0	0	999999999	0	0	0	999999999	999999999	999999999	0	0	1	0	999999999	11	Charity
52	1	1	1	UK	1	3	26	0	0	30	0	1	0	1	0	2	0	1	1	University or Vet School	7	11	Private
53	1	1	1	UK	0	45	66	0	0	10	0	1	0	6	0	4	0	0	3	0	999999999	11	Private
54	1	1	1	UK	1	6	30	1	0	40	0	1	0	8	0	1	0	0	1	0	999999999	11	Private
55	1	1	1	UK	1	3	27	0	0	15	1	1	0	0	4	9	0	1	1	University or Vet School	7	11	Uni
56	1	1	1	UK	1	7	32	0	0	100	1	1	0	0	1	4	0	0	1	0	999999999	11	Private
57	1	1	1	UK	0	10	34	0	0	180	1	1	0	0	6	4	0	1	2	Work place or I teach it	4	11	Uni
58	1	1	1	UK	1	14	39	0	0	999999999	1	0	0	0	3	2	0	0	2	0	999999999	11	Private
59	0	1	1	UK	1	41	65	0	2	999999999	0	0	0	999999999	999999999	999999999	0	0	3	0	999999999	11	GovIndustry
60	0	1	1	UK	0	28	54	0	0	80	0	1	0	2	7	0	0	0	3	0	999999999	11	PrivatePublic
61	1	1	1	UK	1	18	51	1	999999999	60	0	1	0	0	3	1	0	1	2	University or Vet School	7	11	Private
62	1	1	1	UK	1	4	28	0	0	60	0	1	0	2	0	5	0	1	1	University or Vet School	7	11	Private
63	1	1	1	UK	0	4	29	0	0	35	0	1	0	2	3	9	0	0	1	0	999999999	11	Private
65	0	1	1	UK	1	12	35	0	2	20	1	0	0	2	0	6	0	0	2	0	999999999	11	Public
66	0	1	1	UK	1	12	36	1	0	999999999	0	0	0	999999999	999999999	999999999	0	1	2	PG or specialist study or personal research	4	11	Gov
67	0	1	1	UK	0	10	35	0	2	999999999	0	0	0	999999999	999999999	999999999	0	0	2	0	999999999	11	Public
68	0	1	1	UK	1	8	35	1	0	50	1	0	0	2	7	0	0	0	2	0	999999999	11	Public
69	0	1	1	UK	1	2	23	0	0	999999999	0	0	0	999999999	999999999	999999999	0	0	1	0	999999999	11	Public
70	1	1	1	UK	1	1	23	0	0	999999999	0	0	0	999999999	999999999	999999999	0	0	1	0	999999999	11	Private
71	0	1	1	UK	0	23	45	1	2	999999999	0	0	0	999999999	999999999	999999999	0	1	3	Publications, literature or journals	6	11	Research
72	0	1	1	UK	1	13	40	0	0	999999999	0	1	0	2	0	1	0	0	2	0	999999999	11	Other
74	0	1	1	UK	1	14	37	1	0	50	1	1	0	0	2	999999999	0	1	2	Work place or I teach it	4	11	Gov
75	1	1	1	UK	1	8	32	1	0	50	1	1	0	4	1	0	0	1	2	University or Vet School	7	11	Uni
77	0	1	1	UK	0	36	58	1	0	40	1	1	0	0	1	2	0	1	3	Publications, literature or journals	6	11	Charity
78	1	1	1	UK	0	19	40	1	0	50	1	1	1	1	4	0	0	1	2	Ubiquitous or various and multiple sources	1	11	Private
79	1	1	1	UK	0	11	34	1	0	25	1	1	0	1	4	6	0	1	2	CPD, Conferences, meetings, seminars or lectures	2	11	Uni
80	1	1	1	UK	0	44	67	1	0	45	0	1	0	0	1	7	0	1	3	General veterinary or professional knowledge or verbal unknown	5	11	Private
81	0	1	1	UK	1	21	46	1	0	55	1	1	0	1	3	4	0	1	2	Veterinary Association	5	11	Path
85	1	1	1	UK	0	31	53	0	1	30	1	1	0	0	5	2	0	1	3	0	999999999	11	PrivateGov
86	1	1	1	UK	0	47	69	1	1	10	0	1	0	0	999999999	999999999	0	1	3	Publications, literature or journals	6	11	Private
87	0	1	1	UK	1	7	32	0	2	1100	1	1	0	1	4	9	0	1	1	University or Vet School	7	11	GovPath
88	0	1	1	UK	0	44	65	1	2	30	0	1	0	4	1	999999999	0	1	3	Publications, literature or journals	6	11	Outside
89	0	1	1	UK	0	34	57	0	0	70	1	1	1	1	5	7	0	1	3	Publications, literature or journals	6	11	Gov
90	1	1	1	UK	1	8	30	1	2	20	0	1	0	9	8	0	0	1	2	0	999999999	11	Private
91	0	1	1	UK	1	13	37	0	0	70	1	0	1	1	0	4	0	1	2	Publications, literature or journals	6	11	ResearchPath
92	0	1	1	UK	0	33	55	1	1	999999999	0	0	0	999999999	999999999	999999999	0	0	3	0	999999999	11	Gov
93	1	1	1	UK	0	7	31	1	1	36	1	1	0	0	8	0	0	1	1	0	999999999	11	Private
94	0	1	1	UK	0	35	58	1	0	50	1	0	0	1	4	7	0	1	3	Publications, literature or journals	6	11	Gov
95	1	1	1	UK	1	33	56	1	0	40	0	1	0	0	6	8	0	1	3	Publications, literature or journals	6	11	Other
96	0	1	1	UK	0	39	61	1	1	60	0	1	0	4	5	0	0	1	3	CPD, Conferences, meetings, seminars or lectures	2	11	UniResearchGov
97	0	1	1	UK	0	37	60	0	0	30	0	0	1	0	1	6	0	0	3	0	999999999	11	GovPublic
98	1	1	1	UK	0	12	34	0	0	999999999	0	0	0	999999999	999999999	999999999	0	1	2	University or Vet School	7	11	PrivateGov
99	1	1	1	UK	1	37	59	1	0	40	1	1	0	1	0	9	0	1	3	0	999999999	11	Private
100	1	1	1	UK	0	24	47	0	0	50	1	0	0	3	6	5	0	1	3	Publications, literature or journals	6	11	Private
101	1	1	1	UK	1	5	49	1	0	200	1	0	0	7	0	1	0	1	1	University or Vet School	7	11	Private
102	1	1	1	UK	1	18	41	0	0	80	1	0	0	0	1	5	0	1	2	0	999999999	11	Private
103	0	1	1	UK	0	14	46	1	0	40	1	0	0	0	4	9	0	1	2	0	999999999	11	GovPublic
104	0	1	1	UK	0	41	64	1	1	400	1	0	0	4	1	5	0	1	3	0	999999999	11	Other
105	1	1	1	UK	1	2	25	0	0	35	1	1	0	0	1	3	0	1	1	0	999999999	11	Private
106	1	1	1	UK	1	8	30	0	0	45	1	1	0	0	1	9	0	1	2	0	999999999	11	Private
107	1	1	1	UK	0	13	35	0	0	100	1	0	0	2	8	3	0	1	2	University or Vet School	7	11	Private
108	1	1	1	UK	0	22	45	0	0	50	1	0	0	1	0	9	0	1	3	Colleague or friend	5	11	Private
109	1	1	1	UK	0	5	29	0	0	40	0	1	0	0	0	6	0	1	1	University or Vet School	7	11	Private
110	1	1	1	UK	0	44	67	0	0	25	0	1	0	2	7	4	0	1	3	Publications, literature or journals	6	11	Private
111	1	1	1	UK	0	1	24	0	1	999999999	1	0	0	0	1	8	0	1	1	0	999999999	11	Private
112	1	1	1	UK	1	14	38	0	0	40	1	1	0	0	1	6	0	1	2	Specialist organisation, research centre or referral clinic	5	11	Private
113	1	1	1	UK	1	8	31	0	0	35	1	0	0	2	5	7	0	1	2	University or Vet School	7	11	Private
114	1	1	1	UK	1	9	32	0	2	10	1	0	0	5	1	0	0	0	2	0	999999999	11	Private
115	1	1	1	UK	1	5	27	0	0	12	1	0	0	1	0	9	0	0	1	0	999999999	11	Private
116	0	1	1	UK	0	36	61	0	1	100	1	1	0	0	5	1	0	1	3	Colleague or friend	5	11	Gov
117	1	1	1	UK	0	8	30	0	0	100	0	1	0	2	5	1	0	1	2	0	999999999	11	Private
118	1	1	1	UK	0	7	30	1	0	100	1	1	1	1	3	5	0	1	1	University or Vet School	7	11	Private
119	0	1	1	UK	1	34	57	1	1	40	1	1	0	4	1	5	0	1	3	Emails, E-list, Electronic forums, networks or internet	3	11	Gov
120	1	1	1	UK	0	7	30	0	0	35	0	1	0	1	2	0	0	0	1	0	999999999	11	Private
121	1	1	1	UK	0	20	46	1	0	999999999	0	1	0	0	2	3	0	0	2	0	999999999	11	Other
122	1	1	1	UK	0	1	24	0	0	33	0	1	0	0	9	3	0	1	1	Publications, literature or journals	6	11	Private
123	1	1	1	UK	1	3	28	0	0	60	1	0	0	0	1	5	0	1	1	University or Vet School	7	11	Private
124	1	1	1	UK	0	28	49	0	0	40	0	1	0	1	0	8	0	0	3	0	999999999	11	PrivatePublic
125	1	1	1	UK	1	2	24	0	0	999999999	0	0	0	999999999	999999999	999999999	0	1	1	University or Vet School	7	11	Uni
127	1	1	1	UK	0	10	32	0	0	30	1	1	0	0	2	8	0	1	2	CPD, Conferences, meetings, seminars or lectures	2	11	Private
128	0	1	1	UK	0	33	56	0	0	30	1	0	0	999999999	999999999	999999999	0	0	3	0	999999999	11	Gov
129	1	1	1	UK	0	29	51	0	0	40	0	1	0	0	2	1	0	0	3	0	999999999	11	Private
130	0	1	1	UK	1	14	39	1	2	40	1	1	0	9	0	3	0	1	2	University or Vet School	7	11	Gov
131	1	1	1	UK	0	18	40	0	0	20	1	0	0	0	3	4	0	1	2	University or Vet School	7	11	Private
132	1	1	1	UK	0	10	32	0	0	20	0	1	0	1	0	5	0	1	2	CPD, Conferences, meetings, seminars or lectures	2	11	Private
133	1	1	1	UK	1	1	23	0	2	8	1	0	0	0	2	3	0	0	1	0	999999999	11	Private
134	0	1	1	UK	0	24	46	1	0	50	1	1	0	1	2	6	0	1	3	Publications, literature or journals	6	11	Gov
136	1	1	1	UK	0	31	54	0	0	40	1	1	0	0	4	1	0	1	3	Specialist organisation, research centre or referral clinic	5	11	Private
137	1	1	1	UK	1	6	28	0	0	20	1	1	0	9	0	5	0	1	1	CPD, Conferences, meetings, seminars or lectures	2	11	Private
138	1	1	1	UK	1	10	35	0	0	40	1	1	0	0	5	4	0	1	2	Public debate or general media	1	11	Private
139	1	1	1	UK	1	11	34	0	0	40	1	0	1	0	2	6	0	1	2	CPD, Conferences, meetings, seminars or lectures	2	11	Private
140	0	1	1	UK	1	25	46	1	0	40	1	1	0	9	4	2	0	1	3	Publications, literature or journals	6	11	GovPublic
141	0	1	1	UK	0	30	52	1	0	28	1	0	0	1	4	2	0	0	3	0	999999999	11	Gov
142	0	1	1	UK	0	33	55	1	1	40	1	1	0	5	0	1	0	1	3	Publications, literature or journals	6	11	Gov
143	1	1	1	UK	1	13	35	1	0	80	0	1	0	2	7	0	0	1	2	CPD, Conferences, meetings, seminars or lectures	2	11	Private
144	1	1	1	UK	1	21	42	0	2	4	1	0	0	2	0	5	0	1	2	Publications, literature or journals	6	11	Private
145	1	1	1	UK	1	4	26	0	0	20	1	1	0	0	4	9	0	0	1	0	999999999	11	Private
146	0	1	1	UK	0	17	40	0	0	50	1	0	0	1	0	7	0	1	2	CPD, Conferences, meetings, seminars or lectures	2	11	Industry
147	0	1	1	UK	0	40	62	0	0	999999999	0	0	0	999999999	999999999	999999999	0	0	3	0	999999999	11	Private
148	1	1	1	UK	1	17	40	0	2	35	1	1	1	0	6	9	0	0	2	0	999999999	11	PrivateUni
149	0	1	1	UK	0	34	56	1	0	40	1	1	0	0	5	8	0	1	3	Publications, literature or journals	6	11	Gov
150	0	1	1	UK	1	25	48	1	2	80	1	1	0	999999999	7	5	0	0	3	0	999999999	11	Gov
151	1	1	1	UK	0	44	66	0	2	30	1	0	0	0	1	5	0	1	3	0	999999999	11	Private
152	1	1	1	UK	1	9	32	0	0	999999999	0	0	0	999999999	999999999	999999999	0	0	2	0	999999999	11	Private
153	0	1	1	UK	1	12	36	0	2	12	1	0	0	0	1	9	0	0	2	0	999999999	11	Gov
154	0	1	1	UK	0	43	65	0	2	150	0	0	1	0	6	1	0	0	3	0	999999999	11	Gov
155	1	1	1	UK	1	4	26	0	0	20	1	1	0	1	0	5	0	1	1	University or Vet School	7	11	Private
156	1	1	1	UK	0	21	44	1	0	140	1	1	0	0	1	7	0	1	2	Emails, E-list, Electronic forums, networks or internet	3	11	PrivatePublic
157	1	1	1	UK	1	3	25	0	0	35	1	1	0	0	9	1	0	1	1	0	999999999	11	Private
158	0	1	1	UK	1	28	50	0	0	10	1	1	0	0	1	7	0	0	3	0	999999999	11	Gov
159	1	1	1	UK	0	2	24	0	1	50	1	0	0	0	1	6	0	1	1	University or Vet School	7	11	Private
161	1	1	1	UK	1	8	31	0	0	50	1	1	0	4	0	2	0	1	2	University or Vet School	7	11	Private
162	0	1	1	UK	0	27	49	1	0	10	1	0	0	0	1	5	0	0	3	0	999999999	11	Gov
163	0	1	1	UK	0	14	34	0	0	75	1	0	0	7	0	2	0	0	2	0	999999999	11	Gov
164	1	1	1	UK	1	19	40	0	2	20	0	1	0	2	9	6	0	1	2	0	999999999	11	Private
165	1	1	1	UK	1	5	28	0	0	40	1	0	0	1	0	4	0	0	1	0	999999999	11	Private
166	1	1	1	UK	0	39	62	0	2	20	1	0	0	0	9	5	0	0	3	0	999999999	11	Private
167	0	1	1	UK	1	9	35	0	2	999999999	0	0	0	999999999	999999999	999999999	0	0	2	0	999999999	11	Gov
168	1	1	1	UK	1	12	34	0	0	30	1	1	0	0	1	5	0	0	2	0	999999999	11	Private
169	0	1	1	UK	1	9	31	0	0	35	1	1	0	0	4	7	0	1	2	Publications, literature or journals	6	11	Gov
170	1	1	1	UK	0	29	51	1	999999999	100	0	1	0	7	1	5	0	1	3	0	999999999	11	Private
171	1	1	1	UK	0	2	25	0	2	30	1	0	0	0	4	7	0	0	1	0	999999999	11	Private
172	1	1	1	UK	1	10	34	0	2	15	0	1	0	0	1	5	0	0	2	0	999999999	11	Private
173	1	1	1	UK	0	28	52	0	2	40	0	1	0	6	5	0	0	0	3	0	999999999	11	Private
174	1	1	1	UK	0	39	61	0	0	50	0	1	0	2	0	1	0	0	3	0	999999999	11	Private
175	1	1	1	UK	0	13	36	0	0	15	1	0	0	1	0	4	0	1	2	Colleague or friend	5	11	Private
176	1	1	1	UK	1	7	31	0	1	35	0	0	1	9	0	4	0	1	1	University or Vet School	7	11	Private
178	1	1	1	UK	0	13	36	0	0	30	1	0	0	0	6	1	0	1	2	Publications, literature or journals	6	11	Private
179	0	1	1	UK	0	25	48	1	2	35	1	1	0	0	1	2	0	1	3	Colleague or friend	5	11	GovPublic
180	0	1	1	UK	0	28	51	1	2	40	0	1	1	0	1	2	0	1	3	University or Vet School	7	11	Gov
181	1	1	1	UK	1	19	44	1	0	300	1	1	0	4	2	7	0	1	2	University or Vet School	7	11	Private
182	1	1	1	UK	0	9	32	0	0	300	0	1	0	0	2	9	0	1	2	PG or specialist study or personal research	4	11	PrivateGovPublic
183	1	1	1	UK	0	11	33	0	0	30	1	1	0	0	2	4	0	1	2	University or Vet School	7	11	Private
184	1	1	1	UK	1	7	31	0	0	50	1	1	0	2	0	9	0	1	1	0	999999999	11	PrivateCharity
185	1	1	1	UK	0	9	31	0	0	999999999	1	0	0	2	0	1	0	1	2	Publications, literature or journals	6	11	Private
186	0	1	1	UK	0	25	47	0	1	50	0	1	0	0	5	2	0	1	3	Publications, literature or journals	6	11	Gov
187	0	1	1	UK	0	31	54	0	0	40	0	1	1	0	1	4	0	1	3	Publications, literature or journals	6	11	Public
188	1	1	1	UK	0	13	36	1	0	50	1	0	1	1	0	4	0	0	2	0	999999999	11	Private
189	0	1	1	UK	0	8	30	0	2	50	1	1	0	0	1	9	0	0	2	0	999999999	11	Gov
190	0	1	1	UK	1	20	42	0	0	40	1	1	0	0	1	4	0	1	2	0	999999999	11	Uni
191	1	1	1	UK	0	20	42	0	0	40	0	1	0	3	2	7	0	1	2	CPD, Conferences, meetings, seminars or lectures	2	11	Private
192	1	1	1	UK	1	3	31	0	999999999	40	1	1	0	0	1	2	0	1	1	0	999999999	11	Private
193	1	1	1	UK	1	1	24	0	0	999999999	0	0	0	999999999	999999999	999999999	0	1	1	University or Vet School	7	11	Private
194	1	1	1	UK	0	2	24	0	0	36	1	0	0	0	1	2	0	1	1	University or Vet School	7	11	Private
195	1	1	1	UK	1	32	54	1	999999999	35	1	0	0	0	2	4	0	1	3	CPD, Conferences, meetings, seminars or lectures	2	11	Private
196	0	1	1	UK	0	38	62	0	0	40	1	0	0	0	4	2	0	0	3	0	999999999	11	Gov
199	0	1	1	UK	0	10	34	1	2	70	1	0	0	0	1	2	0	0	2	0	999999999	11	Gov
200	0	1	1	UK	1	10	38	1	0	20	0	1	0	2	4	6	0	1	2	PG or specialist study or personal research	4	11	Gov
201	1	1	1	UK	1	13	38	1	0	400	0	1	0	10	2	5	0	1	2	PG or specialist study or personal research	4	11	Private
202	1	1	1	UK	0	14	37	0	0	20	1	0	0	0	4	999999999	0	0	2	0	999999999	11	Private
203	0	1	1	UK	1	11	33	1	1	10	1	0	0	0	4	2	0	0	2	0	999999999	11	Gov
204	0	1	1	UK	0	26	47	1	0	40	1	0	0	0	3	1	0	0	3	0	999999999	11	GovPublic
205	0	1	1	UK	0	12	40	1	1	999999999	0	0	0	999999999	999999999	999999999	0	0	2	0	999999999	11	Gov
206	0	1	1	UK	1	29	51	0	1	20	0	1	0	0	1	5	0	0	3	0	999999999	11	PrivatePublic
207	1	1	1	UK	1	9	33	0	2	50	1	1	0	0	3	2	0	1	2	CPD, Conferences, meetings, seminars or lectures	2	11	PrivatePublic
208	0	1	1	UK	1	3	26	1	1	6	1	1	0	0	6	9	0	1	1	University or Vet School	7	11	UniResearch
209	1	1	1	UK	1	4	26	0	0	50	1	1	0	0	2	1	0	1	1	0	999999999	11	Army
210	0	1	1	UK	0	27	49	1	2	999999999	0	0	0	999999999	999999999	999999999	0	0	3	0	999999999	11	ResearchOutside
211	1	1	1	UK	1	6	28	0	2	40	1	0	0	0	1	9	0	0	1	0	999999999	11	Private
212	1	1	1	UK	1	31	52	1	0	735	1	1	0	1	4	5	0	1	3	Publications, literature or journals	6	11	Private
213	1	1	1	UK	1	7	29	1	2	35	1	0	0	0	1	2	0	1	1	University or Vet School	7	11	Private
214	1	1	1	UK	1	28	49	0	2	999999999	0	1	0	9	5	0	0	1	3	CPD, Conferences, meetings, seminars or lectures	2	11	Private
215	1	1	1	UK	0	14	37	0	0	30	0	1	0	1	6	0	0	1	2	Another discipline e.g. human medicine or science	1	11	Private
216	1	1	1	UK	1	2	29	0	0	999999999	0	0	0	999999999	999999999	999999999	0	1	1	University or Vet School	7	11	Uni
217	1	1	1	UK	1	31	53	0	1	40	1	0	0	0	5	8	0	1	3	0	999999999	11	Private
218	0	1	1	UK	1	38	60	1	2	60	0	1	0	4	1	6	0	1	3	Another discipline e.g. human medicine or science	1	11	UniPath
219	1	1	1	UK	1	6	28	0	1	38	1	0	0	0	5	9	0	1	1	0	999999999	11	Private
220	1	1	1	UK	0	31	52	0	0	35	1	0	0	0	9	5	0	0	3	0	999999999	11	Private
221	1	1	1	UK	1	8	31	1	0	40	1	0	0	4	1	6	0	1	2	PG or specialist study or personal research	4	11	Private
222	1	1	1	UK	1	6	28	0	2	20	1	0	0	2	0	4	0	0	1	0	999999999	11	Private
223	0	1	1	UK	1	32	54	1	0	50	0	1	0	1	3	7	0	1	3	University or Vet School	7	11	ResearchOther
224	1	1	1	UK	1	7	30	1	1	50	0	1	0	9	2	0	0	1	1	University or Vet School	7	11	Private
225	0	1	1	UK	0	3	25	1	0	40	1	0	1	0	1	4	0	1	1	PG or specialist study or personal research	4	11	Research
226	1	1	1	UK	0	5	27	0	0	25	1	1	0	1	4	7	0	0	1	0	999999999	11	Uni
227	1	1	1	UK	1	4	28	0	0	20	1	1	0	0	1	8	0	0	1	0	999999999	11	Uni
229	1	1	1	UK	0	36	58	1	0	80	1	1	0	4	1	0	0	1	3	CPD, Conferences, meetings, seminars or lectures	2	11	Uni
230	1	1	1	UK	1	28	50	0	2	40	1	0	0	0	1	2	0	1	3	Publications, literature or journals	6	11	Private
231	1	1	1	UK	0	24	47	1	0	120	1	0	0	1	4	9	0	1	3	Work place or I teach it	4	11	Uni
232	1	1	1	UK	1	7	32	0	0	60	1	0	0	0	1	9	0	1	1	Don't know	1	11	Uni
233	1	1	1	UK	0	21	45	1	0	70	1	1	0	0	1	2	0	1	2	0	999999999	11	Uni
234	1	1	1	UK	0	12	35	1	0	100	0	1	1	4	1	6	0	1	2	Publications, literature or journals	6	11	UniResearch
235	1	1	1	UK	0	7	31	1	0	80	1	0	0	0	4	999999999	0	1	1	Publications, literature or journals	6	11	Uni
236	1	1	1	UK	1	6	29	1	1	50	0	1	0	0	2	5	0	1	1	University or Vet School	7	11	Uni
237	1	1	1	UK	0	11	34	1	0	100	1	1	0	1	0	9	0	1	2	CPD, Conferences, meetings, seminars or lectures	2	11	Uni
238	0	1	1	UK	1	20	42	1	1	50	1	1	0	0	1	2	0	1	2	0	999999999	11	UniResearchPath
239	1	1	1	UK	1	8	30	0	0	35	1	0	0	2	0	6	0	1	2	CPD, Conferences, meetings, seminars or lectures	2	11	Charity
240	0	1	1	UK	0	45	68	1	0	999999999	0	0	0	999999999	999999999	999999999	0	1	3	0	999999999	11	Uni
241	1	1	1	UK	1	1	23	0	0	35	1	1	0	3	5	6	0	1	1	University or Vet School	7	11	Uni
242	1	1	1	UK	1	5	27	0	0	35	0	1	0	0	1	4	0	1	1	University or Vet School	7	11	Private
243	1	1	1	UK	0	30	52	0	0	120	0	1	0	10	10	10	0	1	3	Publications, literature or journals	6	11	Private
244	1	1	1	UK	1	8	30	0	2	40	1	0	0	2	7	5	0	1	2	0	999999999	11	Private
245	1	1	1	UK	1	4	26	0	2	30	1	0	0	0	6	5	0	1	1	University or Vet School	7	11	Private
246	1	1	1	UK	1	3	26	1	1	50	1	1	1	0	1	4	0	1	1	University or Vet School	7	11	Private
247	0	1	1	UK	1	1	22	0	0	999999999	0	0	0	999999999	999999999	999999999	0	1	1	University or Vet School	7	11
248	1	1	1	UK	1	22	43	1	0	35	1	1	0	0	1	2	0	1	3	Publications, literature or journals	6	11	Private
249	1	1	1	UK	1	7	29	0	0	50	1	0	0	0	2	5	0	1	1	University or Vet School	7	11	Private
250	1	1	1	UK	0	10	31	1	0	100	1	0	1	0	1	4	0	1	2	0	999999999	11	Private
252	1	1	1	UK	0	4	26	0	1	40	1	0	0	0	2	1	0	1	1	0	999999999	11	Private
253	1	1	1	UK	0	15	39	1	0	20	0	1	0	0	1	5	0	1	2	Publications, literature or journals	6	11	Private
254	0	1	1	UK	1	5	28	0	2	999999999	0	0	0	999999999	999999999	999999999	0	0	1	0	999999999	11	Public
255	1	1	1	UK	1	32	55	0	0	35	1	0	0	0	1	8	0	1	3	0	999999999	11	Charity
256	1	1	1	UK	0	19	42	0	0	40	1	0	0	0	8	7	0	1	2	CPD, Conferences, meetings, seminars or lectures	2	11	Charity
257	1	1	1	UK	1	5	30	0	0	100	1	1	1	9	0	1	0	1	1	Ubiquitous or various and multiple sources	1	11	PrivateResearch
258	1	1	1	UK	1	4	35	0	1	35	1	0	0	0	8	5	0	1	1	University or Vet School	7	11	Charity
259	1	1	1	UK	1	25	45	0	2	55	1	1	0	0	2	6	0	1	3	University or Vet School	7	11	Charity
260	1	1	1	UK	1	33	54	0	2	45	1	1	1	0	7	1	0	1	3	CPD, Conferences, meetings, seminars or lectures	2	11	Private
261	0	1	1	UK	1	6	27	0	2	100	1	0	1	1	5	7	0	1	1	Publications, literature or journals	6	11	Gov
262	1	1	1	UK	1	33	54	0	0	35	1	1	0	2	5	0	0	0	3	0	999999999	11	Private
263	1	1	1	UK	0	36	58	0	0	999999999	0	0	0	999999999	999999999	999999999	0	1	3	Colleague or friend	5	11	Private
264	1	1	1	UK	1	24	46	0	2	35	1	0	0	7	8	9	0	1	3	CPD, Conferences, meetings, seminars or lectures	2	11	Private
265	0	1	1	UK	1	31	51	0	2	30	0	1	0	0	2	3	0	0	3	0	999999999	11	Private
266	1	1	1	UK	1	3	25	0	0	40	1	1	0	0	1	5	0	1	1	0	999999999	11	Private
267	1	1	1	UK	1	24	47	1	2	30	1	1	0	2	0	9	0	1	3	Publications, literature or journals	6	11	Private
268	0	1	1	UK	0	5	27	1	0	500	1	0	0	1	4	7	0	1	1	CPD, Conferences, meetings, seminars or lectures	2	11	UniResearch
269	1	1	1	UK	0	9	31	0	2	42	1	0	0	1	0	2	0	1	2	CPD, Conferences, meetings, seminars or lectures	2	11	Private
270	1	1	1	UK	0	38	999999999	0	1	40	0	1	0	9	5	1	0	1	3	0	999999999	11	Private
271	1	1	1	UK	0	31	54	0	1	35	1	0	0	0	9	2	0	1	3	Ubiquitous or various and multiple sources	1	11	Private
273	1	1	1	UK	1	10	33	1	0	35	1	0	0	1	0	5	0	1	2	0	999999999	11	Private
274	0	1	1	UK	1	8	30	0	2	40	1	0	0	1	0	4	0	1	2	Specialist organisation, research centre or referral clinic	5	11	Path
275	1	1	1	UK	0	40	62	0	1	20	0	1	0	0	2	9	0	1	3	0	999999999	11	Private
276	0	1	1	UK	0	15	39	0	2	30	0	1	0	1	0	2	0	0	2	0	999999999	11	Private
277	1	1	1	UK	1	37	58	1	0	50	0	1	0	0	4	7	0	1	3	0	999999999	11	Private
278	1	1	1	UK	1	37	57	0	2	30	1	0	0	0	9	1	0	1	3	Publications, literature or journals	6	11	PrivateGovOther
279	1	1	1	UK	1	11	33	0	0	40	1	0	0	0	1	2	0	1	2	Publications, literature or journals	6	11	Private
280	1	1	1	UK	0	3	25	0	0	40	1	1	0	0	1	9	0	1	1	0	999999999	11	Private
281	1	1	1	UK	1	17	39	0	0	30	0	1	0	2	3	9	0	1	2	Publications, literature or journals	6	11	Private
282	1	1	1	UK	1	12	33	0	0	35	1	0	0	0	1	5	0	1	2	Publications, literature or journals	6	11	Private
283	0	1	1	UK	0	35	57	0	0	40	1	1	0	1	0	4	0	1	3	Work place or I teach it	4	11	Uni
284	0	1	1	UK	0	23	46	1	0	50	1	0	0	4	5	7	0	1	3	Another discipline e.g. human medicine or science	1	11	Gov
285	1	1	1	UK	0	5	27	0	0	30	1	0	0	0	9	7	0	1	1	0	999999999	11	Private
286	1	1	1	UK	1	6	28	0	0	45	1	0	0	0	1	2	0	1	1	Another discipline e.g. human medicine or science	1	11	Private
287	1	1	1	UK	1	7	29	0	0	35	1	1	0	0	1	9	0	1	1	Ubiquitous or various and multiple sources	1	11	Private
288	1	1	1	UK	0	20	52	1	0	40	1	1	0	0	1	4	0	1	2	CPD, Conferences, meetings, seminars or lectures	2	11	Private
289	999999999	1	1	UK	999999999	999999999	999999999	999999999	1	999999999	0	0	0	999999999	999999999	999999999	0	1	999999999	0	999999999	11	#N/A
291	1	1	1	UK	1	17	37	1	2	100	0	1	1	2	3	7	0	1	2	CPD, Conferences, meetings, seminars or lectures	2	11	Private
293	1	1	1	UK	1	5	27	0	2	40	1	0	0	0	3	9	0	1	1	0	999999999	11	Private
295	1	1	1	UK	0	20	41	0	0	37	1	1	0	0	1	3	0	1	2	Publications, literature or journals	6	11	Charity
296	1	1	1	UK	1	4	26	1	0	30	1	0	0	4	6	1	0	1	1	Publications, literature or journals	6	11	Private
297	1	1	1	UK	1	17	39	1	0	50	1	1	0	0	1	2	0	1	2	University or Vet School	7	11	UniCharity
298	1	1	1	UK	1	6	28	0	0	200	1	1	0	0	4	6	0	1	1	University or Vet School	7	11	Private
300	1	1	1	UK	0	12	34	0	999999999	40	1	0	0	0	9	5	0	1	2	Don't know	1	11	Private
301	1	1	1	UK	0	31	52	1	2	100	1	0	0	2	3	0	0	1	3	Publications, literature or journals	6	11	Private
303	1	1	1	UK	0	7	29	0	0	40	1	0	0	0	6	5	0	0	1	0	999999999	11	Private
304	1	1	1	UK	0	10	32	1	1	50	1	0	0	0	4	6	0	1	2	Publications, literature or journals	6	11	Private
305	1	1	1	UK	1	22	44	0	2	999999999	1	0	0	0	4	5	0	1	3	Publications, literature or journals	6	11	Private
306	0	1	1	UK	0	38	59	1	0	30	1	1	0	1	4	5	0	1	3	Veterinary Association	5	11	Gov
307	1	1	1	UK	1	8	30	0	0	35	1	0	0	0	1	9	0	1	2	Publications, literature or journals	6	11	Private
308	1	1	1	UK	1	6	28	0	1	35	1	0	0	2	5	9	0	1	1	0	999999999	11	Private
309	1	1	1	UK	0	7	30	0	2	60	1	0	0	1	0	2	0	1	1	Publications, literature or journals	6	11	Private
310	1	1	1	UK	0	41	63	1	0	200	1	0	0	0	1	2	0	1	3	Publications, literature or journals	6	11	Private
311	0	1	1	UK	0	41	63	1	0	60	1	1	0	0	1	4	0	1	3	Colleague or friend	5	11	GovPath
312	1	1	1	UK	0	25	46	0	1	40	1	0	0	0	1	4	0	1	3	Publications, literature or journals	6	11	Private
313	1	1	1	UK	1	17	42	1	0	10	0	1	0	2	3	7	0	1	2	0	999999999	11	Private
314	1	1	1	UK	0	42	66	1	0	20	1	0	0	2	4	0	0	1	3	University or Vet School	7	11	Private
315	1	1	1	UK	0	16	38	0	2	35	1	0	0	1	0	5	0	1	2	0	999999999	11	Private
316	1	1	1	UK	0	36	58	0	0	30	1	0	0	0	7	5	0	0	3	0	999999999	11	Private
317	1	1	1	UK	0	22	44	0	0	6	1	0	0	0	1	5	0	1	3	0	999999999	11	Private
318	0	1	1	UK	0	28	49	0	2	35	1	0	0	0	6	999999999	0	1	3	Colleague or friend	5	11	Private
319	0	1	1	UK	0	48	72	1	1	999999999	0	0	0	999999999	999999999	999999999	0	1	3	0	999999999	11	Outside
320	1	1	1	UK	1	20	42	0	0	35	1	1	1	5	6	0	0	1	2	Publications, literature or journals	6	11	Private
321	1	1	1	UK	1	15	36	0	0	40	1	1	0	0	9	1	0	1	2	CPD, Conferences, meetings, seminars or lectures	2	11	Private
322	1	1	1	UK	1	26	47	0	2	40	1	0	0	9	0	3	0	1	3	Publications, literature or journals	6	11	Charity
323	1	1	1	UK	0	19	41	0	0	50	1	1	0	0	2	4	0	1	2	PG or specialist study or personal research	4	11	Private
324	1	1	1	UK	1	2	25	0	1	35	1	1	0	1	0	3	0	1	1	0	999999999	11	Private
325	1	1	1	UK	1	14	36	1	2	35	1	1	0	0	1	3	0	1	2	0	999999999	11	Private
326	1	1	1	UK	1	32	54	0	999999999	999999999	0	1	0	4	0	2	0	1	3	General veterinary or professional knowledge or verbal unknown	5	11	Private
327	1	1	1	UK	0	4	27	1	1	40	1	1	0	0	4	3	0	1	1	University or Vet School	7	11	Private
330	1	1	1	UK	1	9	30	0	0	15	1	0	0	1	0	5	0	0	2	0	999999999	11	Private
331	0	1	1	UK	1	28	50	1	0	45	1	0	0	0	1	7	0	0	3	0	999999999	11	Research
332	1	1	1	UK	0	25	50	0	2	40	1	0	0	0	5	4	0	1	3	0	999999999	11	Private
333	1	1	1	UK	1	21	43	0	2	999999999	1	0	0	0	1	8	0	0	2	0	999999999	11	Private
334	1	1	1	UK	1	4	27	0	0	25	1	1	0	2	0	7	0	1	1	University or Vet School	7	11	Private
335	1	1	1	UK	0	29	50	1	0	45	1	0	0	1	0	4	0	1	3	CPD, Conferences, meetings, seminars or lectures	2	11	Private
336	1	1	1	UK	1	5	28	0	0	25	1	0	0	9	0	1	0	1	1	Publications, literature or journals	6	11	Private
337	1	1	1	UK	1	27	48	0	0	25	0	1	0	1	0	9	0	1	3	Publications, literature or journals	6	11	Private
338	1	1	1	UK	0	11	34	0	0	600	1	1	0	1	7	9	0	1	2	0	999999999	11	Private
339	1	1	1	UK	1	16	41	1	999999999	30	1	0	0	0	999999999	999999999	0	1	2	PG or specialist study or personal research	4	11	Private
340	1	1	1	UK	1	6	27	0	1	20	1	1	0	0	2	7	0	1	1	0	999999999	11	Private
341	0	1	1	UK	1	18	41	1	0	25	1	1	0	2	9	4	0	1	2	Publications, literature or journals	6	11	Gov
342	1	1	1	UK	0	27	50	1	0	35	1	0	0	1	4	7	0	0	3	0	999999999	11	Private
344	1	1	1	UK	0	43	65	1	1	30	0	1	0	0	1	2	0	1	3	Work place or I teach it	4	11	Private
346	1	1	1	UK	1	30	52	0	1	30	1	0	0	5	3	1	0	1	3	Another discipline e.g. human medicine or science	1	11	Private
347	1	1	1	UK	1	1	23	0	0	40	1	1	0	0	4	0	0	1	1	0	999999999	11	Private
348	1	1	1	UK	1	3	25	0	0	20	1	0	0	0	9	8	0	1	1	0	999999999	11	Private
349	1	1	1	UK	1	16	38	1	2	35	1	1	0	0	2	8	0	1	2	0	999999999	11	Private
350	1	1	1	UK	1	5	27	0	0	40	1	1	0	1	0	5	0	1	1	University or Vet School	7	11	Private
351	0	1	1	UK	0	37	58	0	2	70	1	0	0	3	0	1	0	0	3	0	999999999	11	Gov
352	1	1	1	UK	0	21	43	0	1	35	1	0	0	0	8	5	0	1	2	CPD, Conferences, meetings, seminars or lectures	2	11	Private
353	1	1	1	UK	1	3	30	0	0	30	0	1	0	2	3	5	0	1	1	Publications, literature or journals	6	11	Private
354	0	1	1	UK	0	11	35	1	0	50	1	0	0	1	0	3	0	1	2	University or Vet School	7	11	ResearchGovPath
355	1	1	1	UK	1	9	32	0	0	35	1	0	0	0	5	8	0	1	2	CPD, Conferences, meetings, seminars or lectures	2	11	Private
356	1	1	1	UK	0	42	65	1	0	150	1	1	1	4	0	6	0	1	3	Publications, literature or journals	6	11	PrivateIndustry
357	0	1	1	UK	0	34	58	0	2	40	1	1	0	1	0	5	0	0	3	0	999999999	11	Gov
358	1	1	1	UK	0	35	57	1	0	40	1	1	0	0	1	9	0	1	3	CPD, Conferences, meetings, seminars or lectures	2	11	PrivateGov
359	1	1	1	UK	1	38	61	0	0	40	0	1	0	0	6	1	0	1	3	Publications, literature or journals	6	11	Private
360	1	1	1	UK	1	9	30	0	1	35	1	1	0	0	2	9	0	1	2	University or Vet School	7	11	Private
361	1	1	1	UK	0	10	32	0	0	60	1	0	0	0	4	2	0	1	2	Ubiquitous or various and multiple sources	1	11	Private
362	0	1	1	UK	1	5	27	0	2	35	1	0	0	9	0	4	0	1	1	0	999999999	11	GovPath
363	1	1	1	UK	1	30	54	0	999999999	35	1	0	0	0	5	3	0	1	3	General veterinary or professional knowledge or verbal unknown	5	11	Private
364	1	1	1	UK	1	24	46	0	0	50	1	0	0	0	1	5	0	1	3	University or Vet School	7	11	Private
365	0	1	1	UK	1	4	29	1	0	40	1	1	0	2	8	0	0	1	1	0	999999999	11	GovPublic
366	1	1	1	UK	1	1	25	0	1	30	1	0	0	0	8	2	0	1	1	0	999999999	11	Private
367	0	1	1	UK	0	27	50	1	0	60	1	0	0	5	2	0	0	0	3	0	999999999	11	Public
368	1	1	1	UK	0	21	43	0	0	40	1	0	0	9	0	1	0	1	2	0	999999999	11	Private
369	1	1	1	UK	0	36	58	0	1	35	1	0	0	0	9	5	0	1	3	0	999999999	11	Private
370	1	1	1	UK	0	20	45	0	0	35	1	0	0	0	9	4	0	1	2	0	999999999	11	Private
371	1	1	1	UK	1	7	29	0	0	45	1	0	0	2	0	3	0	1	1	0	999999999	11	Private
372	1	1	1	UK	1	7	29	1	0	50	1	1	0	1	4	0	0	1	1	0	999999999	11	Uni
373	0	1	1	UK	0	27	49	1	0	500	1	1	0	0	4	2	0	1	3	Blank or invalid answer	1	11	Army
374	1	1	1	UK	0	12	34	1	0	30	1	0	0	0	2	5	0	1	2	Another discipline e.g. human medicine or science	1	11	Private
375	1	1	1	UK	1	6	36	0	999999999	20	1	0	0	0	2	6	0	1	1	Another discipline e.g. human medicine or science	1	11
376	1	1	1	UK	0	11	34	1	0	35	1	0	0	1	2	5	0	1	2	Work place or I teach it	4	11	Charity
379	1	1	1	UK	1	5	29	1	0	999999999	0	0	0	999999999	999999999	999999999	0	1	1	University or Vet School	7	11	Research
380	0	1	1	UK	1	11	33	1	0	999999999	0	0	0	999999999	999999999	999999999	0	1	2	PG or specialist study or personal research	4	11	ResearchGov
382	1	1	1	UK	1	7	30	0	2	35	1	1	0	2	0	1	0	1	1	Don't know	1	11	Private
383	1	1	1	UK	1	4	32	1	0	40	1	1	0	0	2	4	0	0	1	0	999999999	11	Private
384	0	1	1	UK	1	21	43	0	0	35	1	1	0	2	3	5	0	1	2	University or Vet School	7	11	Private
385	1	1	1	UK	0	25	47	0	0	25	1	0	0	5	0	6	0	1	3	Publications, literature or journals	6	11	Private
386	0	1	1	UK	0	39	61	1	1	30	0	1	0	0	1	4	0	1	3	Work place or I teach it	4	11	Gov
387	1	1	1	UK	1	25	47	0	0	35	1	0	0	0	4	4	0	1	3	0	999999999	11	Private
388	1	1	1	UK	1	3	27	0	0	35	1	0	0	0	1	9	0	1	1	University or Vet School	7	11	Private
389	1	1	1	UK	0	18	40	1	0	40	1	0	0	0	9	3	0	1	2	CPD, Conferences, meetings, seminars or lectures	2	11	Private
390	0	1	1	UK	0	4	30	1	0	20	1	1	0	1	0	4	0	1	1	Work place or I teach it	4	11	Uni
391	1	1	1	UK	0	9	31	0	0	35	1	0	0	0	9	2	0	1	2	0	999999999	11	Private
392	1	1	1	UK	1	6	28	1	0	30	1	0	0	1	0	4	0	1	1	University or Vet School	7	11	Uni
393	0	1	1	UK	0	41	63	1	1	20	0	1	1	0	4	1	0	1	3	0	999999999	11	Other
394	1	1	1	UK	1	15	37	0	0	35	0	1	0	9	2	3	0	1	2	University or Vet School	7	11	Private
395	1	1	1	UK	1	1	37	0	0	50	1	0	0	0	5	4	0	1	1	University or Vet School	7	11	Private
396	1	1	1	UK	1	8	29	0	2	50	1	1	0	1	8	6	0	1	2	0	999999999	11	PrivateUniResearch
397	1	1	1	UK	1	5	27	0	0	35	1	0	0	0	9	2	0	1	1	0	999999999	11	Private
398	0	1	1	UK	1	8	31	1	0	200	1	1	1	0	4	1	0	1	2	PG or specialist study or personal research	4	11	ResearchPath
399	1	1	1	UK	1	28	50	0	0	70	1	1	0	0	1	3	0	1	3	Another discipline e.g. human medicine or science	1	11	Private
400	1	1	1	UK	1	16	39	0	0	40	0	1	0	1	0	2	0	0	2	0	999999999	11	Private
401	1	1	1	UK	0	32	54	0	0	35	1	1	0	0	5	2	0	1	3	Publications, literature or journals	6	11	Private
402	1	1	1	UK	0	5	28	1	0	50	1	0	0	7	8	0	0	0	1	0	999999999	11	Private
404	999999999	1	1	UK	1	33	54	0	2	40	0	1	0	1	0	5	0	1	3	CPD, Conferences, meetings, seminars or lectures	2	11
405	1	1	1	UK	1	8	30	0	1	10	1	0	0	0	2	5	0	1	2	0	999999999	11	Private
406	1	1	1	UK	1	29	50	1	0	25	1	0	0	0	1	5	0	1	3	Another discipline e.g. human medicine or science	1	11	Private
407	1	1	1	UK	1	7	29	0	999999999	150	0	0	0	5	2	6	0	1	1	0	999999999	11	Private
408	1	1	1	UK	1	9	30	0	0	35	1	1	0	0	2	5	0	1	2	0	999999999	11	Private
410	1	1	1	UK	1	13	35	0	0	45	1	1	1	0	3	1	0	1	2	Another discipline e.g. human medicine or science	1	11	Private
412	1	1	1	UK	0	33	55	1	0	40	1	1	0	0	4	1	0	1	3	0	999999999	11	Charity
413	0	1	1	UK	1	23	43	0	0	60	1	1	0	1	0	5	0	1	3	Publications, literature or journals	6	11	Gov
414	0	1	1	UK	0	44	65	1	1	65	1	1	1	4	1	6	0	1	3	University or Vet School	7	11	UniPath
415	1	1	1	UK	1	1	26	1	0	35	1	0	0	0	9	1	0	0	1	0	999999999	11	Private
416	1	1	1	UK	0	7	30	0	0	40	0	1	1	1	0	8	0	1	1	0	999999999	11	PrivateUni
417	0	1	1	UK	0	31	53	0	1	24	1	0	0	0	1	7	0	0	3	0	999999999	11	Research
418	0	1	1	UK	0	33	55	1	2	299	1	0	0	4	1	6	0	0	3	0	999999999	11	Gov
419	1	1	1	UK	0	7	32	1	0	50	1	1	0	0	2	1	0	1	1	CPD, Conferences, meetings, seminars or lectures	2	11	Uni
420	0	1	1	UK	0	31	53	1	0	40	1	0	0	0	4	5	0	1	3	Work place or I teach it	4	11	Uni
421	0	1	1	UK	1	29	49	1	2	100	1	0	0	4	1	0	0	1	3	CPD, Conferences, meetings, seminars or lectures	2	11	Research
422	0	1	1	UK	0	16	38	1	0	50	1	1	0	1	4	0	0	1	2	Publications, literature or journals	6	11	Research
423	1	1	1	UK	0	40	62	1	1	100	1	1	0	4	1	6	0	1	3	CPD, Conferences, meetings, seminars or lectures	2	11	Uni
424	0	1	1	UK	0	40	62	1	1	200	1	1	1	4	10	1	0	1	3	Publications, literature or journals	6	11	Gov
425	1	1	1	UK	1	20	44	1	0	30	0	1	0	1	4	6	0	1	2	CPD, Conferences, meetings, seminars or lectures	2	11	Uni
426	1	1	1	UK	0	2	29	1	0	50	1	1	0	0	2	4	0	1	1	0	999999999	11	Private
427	0	1	1	UK	0	14	38	1	0	70	1	1	0	0	2	4	0	1	2	Publications, literature or journals	6	11	Uni
428	0	1	1	UK	1	32	53	1	2	120	1	1	0	1	0	4	0	1	3	Publications, literature or journals	6	11	UniResearchPath
429	1	1	1	UK	1	10	33	1	0	5	1	1	0	4	1	0	0	1	2	Publications, literature or journals	6	11	Uni
431	0	1	1	UK	1	37	57	1	1	60	1	1	0	1	4	7	0	1	3	Publications, literature or journals	6	11	GovPath
432	1	1	1	UK	0	30	52	1	0	80	1	0	0	0	4	5	0	1	3	0	999999999	11	PrivateUniResearchPath
433	0	1	1	UK	1	10	33	0	1	70	1	1	0	6	4	2	0	1	2	CPD, Conferences, meetings, seminars or lectures	2	11	UniPath
434	1	1	1	UK	1	23	45	1	1	150	1	1	0	4	1	6	0	1	3	0	999999999	11	Uni
435	1	1	1	UK	1	3	31	0	2	50	1	1	0	0	1	2	0	1	1	University or Vet School	7	11	Private
436	0	1	1	UK	0	18	40	1	2	100	0	1	0	0	9	7	0	1	2	0	999999999	11	Other
437	1	1	1	UK	1	13	37	0	2	70	1	0	0	0	1	9	0	0	2	0	999999999	11	Private
438	1	1	1	UK	1	21	44	1	1	50	0	1	0	0	2	3	0	1	2	Work place or I teach it	4	11	PrivateOutsideOther
439	1	1	1	UK	0	9	26	1	0	30	1	1	0	0	2	3	0	1	2	University or Vet School	7	11	Private
440	1	1	1	UK	1	9	31	0	0	38	1	0	0	0	5	6	0	1	2	Publications, literature or journals	6	11	Private
441	1	1	1	UK	1	12	34	0	0	40	1	1	1	1	0	4	0	1	2	Publications, literature or journals	6	11	Private
443	1	1	1	UK	1	20	41	0	0	60	1	1	0	0	5	10	0	1	2	CPD, Conferences, meetings, seminars or lectures	2	11	Private
444	1	1	1	UK	0	33	55	0	0	50	1	1	0	9	0	2	0	1	3	Work place or I teach it	4	11	Charity
445	1	1	1	UK	1	5	33	1	2	30	1	0	0	0	6	3	0	1	1	0	999999999	11	Private
446	1	1	1	UK	1	27	49	1	999999999	999999999	0	1	0	5	0	2	0	1	3	0	999999999	11	Private
447	1	1	1	UK	1	35	56	1	0	30	1	1	0	0	5	3	0	1	3	0	999999999	11	Private
448	1	1	1	UK	0	15	36	0	0	40	1	1	0	1	0	2	0	1	2	Publications, literature or journals	6	11	Private
449	1	1	1	UK	1	4	26	0	2	45	1	0	0	0	2	6	0	1	1	University or Vet School	7	11	Private
450	1	1	1	UK	0	17	39	0	0	40	1	0	0	0	2	8	0	1	2	Publications, literature or journals	6	11	Private
452	1	1	1	UK	1	22	43	1	2	35	1	0	0	0	8	1	0	1	3	CPD, Conferences, meetings, seminars or lectures	2	11	Private
453	1	1	1	UK	1	5	27	0	2	999999999	1	1	0	1	4	8	0	1	1	University or Vet School	7	11	Uni
454	1	1	1	UK	1	21	47	0	1	25	1	0	0	0	3	5	0	0	2	0	999999999	11	Private
455	1	1	1	UK	0	30	52	0	0	32	0	1	0	8	0	4	0	1	3	University or Vet School	7	11	Private
457	1	1	1	UK	0	40	63	1	0	999999999	0	0	0	999999999	999999999	999999999	0	0	3	0	999999999	11	UniPath
458	1	1	1	UK	0	12	34	0	0	40	1	1	1	0	9	2	0	1	2	0	999999999	11	Private
459	1	1	1	UK	0	34	57	0	0	35	0	1	0	0	5	7	0	1	3	University or Vet School	7	11	Private
460	1	1	1	UK	1	7	30	0	0	70	1	1	0	0	1	2	0	1	1	University or Vet School	7	11	Private
461	1	1	1	UK	1	3	29	1	0	40	1	0	0	3	0	9	0	1	1	0	999999999	11	Private
462	1	1	1	UK	0	36	58	0	0	40	1	1	0	6	0	4	0	1	3	University or Vet School	7	11	Private
463	1	1	1	UK	0	25	47	0	1	70	0	1	0	1	4	0	0	1	3	Publications, literature or journals	6	11	Private
464	1	1	1	UK	1	5	27	0	0	15	1	0	0	9	7	3	0	1	1	University or Vet School	7	11	Private
466	1	1	1	UK	0	15	38	1	0	35	0	1	1	1	0	4	0	1	2	University or Vet School	7	11	Private
468	1	1	1	UK	1	19	42	0	2	35	1	0	0	0	9	7	0	1	2	CPD, Conferences, meetings, seminars or lectures	2	11	Private
469	1	1	1	UK	0	7	33	0	0	60	1	1	0	0	2	9	0	1	1	Publications, literature or journals	6	11	Private
470	1	1	1	UK	1	14	37	0	0	40	1	1	1	0	2	0	0	1	2	PG or specialist study or personal research	4	11	Private
471	1	1	1	UK	1	5	26	0	0	30	1	0	0	0	9	8	0	1	1	Publications, literature or journals	6	11	Private
473	1	1	1	UK	0	12	33	0	999999999	765	1	1	0	0	2	5	0	1	2	General veterinary or professional knowledge or verbal unknown	5	11	Private
474	1	1	1	UK	0	39	62	1	1	50	1	1	0	1	9	4	0	1	3	0	999999999	11	Research
475	1	1	1	UK	0	26	49	0	0	40	1	0	0	0	6	4	0	1	3	Another discipline e.g. human medicine or science	1	11	Private
476	1	1	1	UK	0	47	69	1	1	50	0	1	0	1	999999999	999999999	0	1	3	Work place or I teach it	4	11	Other
477	1	1	1	UK	0	43	65	1	2	30	1	0	0	5	0	4	0	1	3	University or Vet School	7	11	Private
478	1	1	1	UK	1	15	37	0	2	30	1	1	0	9	0	5	0	1	2	Another discipline e.g. human medicine or science	1	11	Private
479	0	1	1	UK	0	34	56	0	0	50	0	1	0	4	5	0	0	1	3	Publications, literature or journals	6	11	PrivateCharityOther
480	1	1	1	UK	1	29	52	1	0	35	0	1	0	0	1	5	0	0	3	0	999999999	11	Private
483	0	1	1	UK	0	22	45	1	0	60	1	0	0	1	0	4	0	1	3	Colleague or friend	5	11	Gov
484	1	1	1	UK	1	18	41	0	0	40	1	1	0	0	4	6	0	1	2	Publications, literature or journals	6	11	Private
485	0	1	1	UK	0	7	31	1	2	2	1	0	0	2	0	9	0	0	1	0	999999999	11	Public
486	0	1	1	UK	1	9	32	0	2	15	0	0	1	0	9	8	0	0	2	0	999999999	11	Public
487	0	1	1	UK	1	4	28	1	0	70	0	1	0	9	2	5	0	0	1	0	999999999	11	Public
488	0	1	1	UK	1	45	66	0	0	999999999	0	0	0	999999999	999999999	999999999	0	1	3	Ubiquitous or various and multiple sources	1	11	UniResearchPath
489	1	1	1	UK	1	11	33	0	1	35	1	0	0	0	1	2	0	1	2	0	999999999	11	Private
490	1	1	1	UK	0	8	38	1	0	150	1	0	0	6	0	2	0	1	2	0	999999999	11	Private
491	1	1	1	UK	0	32	55	1	0	60	1	1	1	0	5	9	0	1	3	0	999999999	11	Private
492	1	1	1	UK	0	29	51	0	0	70	1	0	0	6	0	2	0	1	3	0	999999999	11	Private
493	1	1	1	UK	0	4	28	0	0	40	1	1	1	0	1	5	0	1	1	University or Vet School	7	11	Private
494	1	1	1	UK	0	8	30	0	0	40	1	0	0	0	1	8	0	1	2	University or Vet School	7	11	Private
495	1	1	1	UK	1	31	55	0	0	35	0	1	0	0	6	4	0	1	3	Publications, literature or journals	6	11	Private
497	1	1	1	UK	0	30	52	0	0	35	1	0	0	0	2	1	0	1	3	University or Vet School	7	11	Private
498	1	1	1	UK	1	14	36	0	0	35	1	0	0	9	0	3	0	1	2	Publications, literature or journals	6	11	Private
499	1	1	1	UK	1	14	36	0	0	35	1	1	0	0	9	2	0	1	2	Colleague or friend	5	11	Private
500	1	1	1	UK	0	16	38	1	0	32	1	0	0	2	1	0	0	1	2	0	999999999	11	Private
501	1	1	1	UK	0	40	62	0	0	60	1	0	0	2	0	8	0	1	3	0	999999999	11	Private
502	1	1	1	UK	1	13	35	1	2	50	1	1	0	0	2	1	0	1	2	University or Vet School	7	11	PrivateUniPath
503	1	1	1	UK	0	25	46	0	0	40	1	0	0	0	9	1	0	0	3	0	999999999	11	Private
504	1	1	1	UK	0	34	54	0	0	40	1	0	1	0	1	2	0	0	3	0	999999999	11	Private
505	0	1	1	UK	0	29	50	0	0	60	1	1	0	0	4	7	0	1	3	0	999999999	11	Gov
506	1	1	1	UK	1	6	28	1	2	20	1	1	0	0	1	8	0	1	1	University or Vet School	7	11	Charity
507	1	1	1	UK	1	15	38	0	0	35	1	1	0	2	0	5	0	1	2	CPD, Conferences, meetings, seminars or lectures	2	11	Private
508	1	1	1	UK	1	24	45	0	2	20	1	0	0	0	8	5	0	1	3	Publications, literature or journals	6	11	Private
509	1	1	1	UK	0	18	40	0	0	30	1	0	0	6	0	4	0	1	2	Publications, literature or journals	6	11	Private
510	1	1	1	UK	0	31	52	1	999999999	35	1	0	0	9	8	4	0	1	3	Publications, literature or journals	6	11	PrivatePublicOther
511	1	1	1	UK	0	6	28	0	0	50	1	1	0	0	6	9	0	1	1	University or Vet School	7	11	Private
512	1	1	1	UK	0	23	46	1	0	50	0	1	0	7	4	3	0	1	3	University or Vet School	7	11	Industry
513	0	1	1	UK	1	16	38	0	0	30	0	1	0	0	9	2	0	0	2	0	999999999	11	Other
514	0	1	1	UK	0	32	54	1	0	999999999	1	0	0	3	1	7	0	1	3	General veterinary or professional knowledge or verbal unknown	5	11	Gov
515	1	1	1	UK	0	15	39	1	0	60	1	0	0	1	0	7	0	1	2	Ubiquitous or various and multiple sources	1	11	Private
516	1	1	1	UK	1	6	32	1	1	35	0	1	0	2	5	6	0	1	1	Publications, literature or journals	6	11	Private
517	1	1	1	UK	1	9	32	0	0	100	1	0	0	0	4	9	0	1	2	0	999999999	11	Private
518	1	1	1	UK	1	6	28	0	0	40	1	0	0	0	1	9	0	1	1	Publications, literature or journals	6	11	Private
519	1	1	1	UK	1	6	28	0	1	40	1	1	1	9	2	5	0	1	1	0	999999999	11	Private
520	0	1	1	UK	1	32	53	1	0	400	0	1	0	2	4	5	0	1	3	Publications, literature or journals	6	11	Gov
521	1	1	1	UK	0	37	59	0	999999999	40	0	1	0	1	0	8	0	1	3	CPD, Conferences, meetings, seminars or lectures	2	11	PrivateCharity
522	1	1	1	UK	1	23	47	1	2	16	1	0	0	1	0	5	0	1	3	0	999999999	11	Private
523	1	1	1	UK	1	14	37	1	1	35	1	0	0	1	3	0	0	1	2	Publications, literature or journals	6	11	Private
524	1	1	1	UK	1	7	29	0	2	50	1	0	0	3	0	7	0	1	1	Colleague or friend	5	11	Private
525	1	1	1	UK	1	8	30	0	0	40	1	0	0	0	9	1	0	0	2	0	999999999	11	Private
526	1	1	1	UK	1	10	30	1	0	35	1	0	0	0	1	5	0	1	2	University or Vet School	7	11	Private
527	1	1	1	UK	0	17	40	1	0	40	1	0	0	0	4	1	0	1	2	University or Vet School	7	11	Private
529	1	1	1	UK	1	23	47	1	0	15	1	1	0	3	1	2	0	1	3	CPD, Conferences, meetings, seminars or lectures	2	11	Private
530	0	1	1	UK	1	29	51	0	0	20	1	0	0	1	4	7	0	1	3	Publications, literature or journals	6	11	Industry
531	1	1	1	UK	1	22	38	0	0	50	0	1	0	0	2	9	0	0	3	0	999999999	11	Private
532	1	1	1	UK	1	26	49	0	0	45	1	1	1	1	0	8	0	1	3	CPD, Conferences, meetings, seminars or lectures	2	11	Private
533	1	1	1	UK	1	10	33	0	0	100	1	1	0	0	1	2	0	1	2	Work place or I teach it	4	11	Private
534	1	1	1	UK	0	3	26	0	2	80	1	0	0	0	2	5	0	1	1	0	999999999	11	Private
535	1	1	1	UK	0	15	37	1	0	40	1	0	0	0	5	9	0	1	2	CPD, Conferences, meetings, seminars or lectures	2	11	Private
536	1	1	1	UK	0	6	30	0	2	50	1	0	0	0	1	5	0	1	1	University or Vet School	7	11	Private
537	1	1	1	UK	1	9	31	0	2	30	1	0	0	0	2	8	0	1	2	0	999999999	11	Private
538	1	1	1	UK	1	7	32	1	2	60	1	0	0	0	5	9	0	1	1	PG or specialist study or personal research	4	11	Private
539	1	1	1	UK	1	4	26	0	2	10	1	0	0	2	0	4	0	1	1	University or Vet School	7	11	Private
540	1	1	1	UK	1	23	44	0	0	30	1	1	1	6	0	8	0	1	3	University or Vet School	7	11	Private
541	1	1	1	UK	1	7	29	0	0	40	1	1	0	0	4	8	0	1	1	University or Vet School	7	11	PrivateOther
542	0	1	1	UK	1	23	53	1	0	40	0	1	1	0	1	4	0	1	3	Publications, literature or journals	6	11	Gov
543	1	1	1	UK	0	3	25	0	0	50	1	0	0	0	4	1	0	1	1	University or Vet School	7	11	Private
544	0	1	1	UK	0	38	61	0	0	40	1	1	0	5	4	1	0	1	3	Publications, literature or journals	6	11	Other
545	1	1	1	UK	0	11	32	0	1	999999999	1	0	0	0	8	9	0	1	2	General veterinary or professional knowledge or verbal unknown	5	11	Private
547	1	1	1	UK	1	2	29	0	0	30	1	0	0	9	2	7	0	1	1	University or Vet School	7	11	Private
548	1	1	1	UK	1	1	23	0	0	25	1	0	0	0	1	2	0	1	1	University or Vet School	7	11	Private
549	1	1	1	UK	0	5	26	0	0	60	1	1	1	1	0	2	0	1	1	University or Vet School	7	11	Private
550	1	1	1	UK	1	29	51	0	2	40	0	1	0	0	3	5	0	1	3	Another discipline e.g. human medicine or science	1	11	Private
551	1	1	1	UK	0	7	29	0	0	200	1	0	0	0	9	1	0	1	1	University or Vet School	7	11	Private
552	1	1	1	UK	1	7	29	0	0	50	1	0	0	8	0	2	0	1	1	University or Vet School	7	11	Private
553	0	1	1	UK	0	25	46	1	1	35	1	0	0	4	1	0	0	1	3	0	999999999	11	Gov
554	1	1	1	UK	1	4	27	0	0	30	1	0	0	0	1	2	0	1	1	University or Vet School	7	11	Private
555	1	1	1	UK	0	28	49	1	0	40	1	1	0	2	0	3	0	1	3	Publications, literature or journals	6	11	Private
557	0	1	1	UK	1	5	28	0	2	35	1	1	0	0	6	2	0	0	1	0	999999999	11	Other
558	1	1	1	UK	0	21	52	1	2	25	1	0	0	0	4	5	0	0	2	0	999999999	11	Private
559	1	1	1	UK	1	15	39	0	2	999999999	1	1	0	1	2	4	0	1	2	Publications, literature or journals	6	11	PrivateCharity
560	1	1	1	UK	0	30	52	0	0	45	1	0	0	0	6	1	0	1	3	CPD, Conferences, meetings, seminars or lectures	2	11	Private
562	1	1	1	UK	0	22	44	0	0	50	1	0	0	0	8	5	0	1	3	Publications, literature or journals	6	11	Private
563	1	1	1	UK	0	10	32	0	0	35	1	0	0	0	4	999999999	0	1	2	Commercial pharmaceutical or nutrition company	5	11	Private
564	1	1	1	UK	0	37	60	1	2	40	0	1	0	1	0	4	0	1	3	CPD, Conferences, meetings, seminars or lectures	2	11	Private
565	1	1	1	UK	1	7	30	1	0	50	1	1	0	0	9	5	0	1	1	University or Vet School	7	11	PrivateUni
566	1	1	1	UK	0	30	51	0	2	40	0	1	0	0	4	7	0	1	3	Publications, literature or journals	6	11	Private
568	1	1	1	UK	0	36	57	0	1	50	1	0	0	0	8	999999999	0	0	3	0	999999999	11	Private
569	1	1	1	UK	0	41	62	0	1	30	1	0	0	4	0	5	0	1	3	Publications, literature or journals	6	11	Private
570	1	1	1	UK	1	42	62	0	2	40	1	0	0	4	0	5	0	0	3	0	999999999	11	Charity
571	1	1	1	UK	1	7	29	0	999999999	25	1	1	0	0	5	2	0	1	1	0	999999999	11	PrivateCharity
573	1	1	1	UK	0	10	32	0	2	40	1	0	1	0	1	8	0	1	2	CPD, Conferences, meetings, seminars or lectures	2	11	Private
574	1	1	1	UK	0	11	33	0	2	25	1	0	0	0	8	4	0	1	2	Publications, literature or journals	6	11	Private
575	1	1	1	UK	1	4	26	0	1	18	1	0	0	0	2	5	0	0	1	0	999999999	11	Private
576	1	1	1	UK	0	25	47	0	1	40	1	0	0	0	2	3	0	1	3	Publications, literature or journals	6	11	Private
577	1	1	1	UK	1	11	33	0	0	70	1	1	0	0	8	1	0	0	2	0	999999999	11	Private
578	1	1	1	UK	0	18	40	0	0	36	1	0	0	1	0	5	0	1	2	Ubiquitous or various and multiple sources	1	11	Private
579	1	1	1	UK	0	31	53	0	1	40	1	0	0	0	5	2	0	1	3	0	999999999	11	Private
580	1	1	1	UK	1	6	27	0	2	30	1	0	0	1	0	8	0	1	1	University or Vet School	7	11	Private
581	1	1	1	UK	1	7	29	1	0	20	0	1	0	0	9	5	0	1	1	0	999999999	11	Private
584	1	1	1	UK	1	1	22	0	2	999999999	0	0	0	999999999	999999999	999999999	0	1	1	0	999999999	11	Private
585	1	1	1	UK	1	21	43	1	0	200	1	1	0	1	0	0	0	1	2	Work place or I teach it	4	11	Uni
586	1	1	1	UK	0	33	55	1	0	35	1	0	0	6	5	8	0	0	3	0	999999999	11	Gov
587	1	1	1	UK	0	24	47	1	0	50	0	1	0	4	2	0	0	1	3	Publications, literature or journals	6	11	Private
589	1	1	1	UK	1	7	38	1	0	40	1	0	0	0	1	9	0	1	1	0	999999999	11	Charity
590	0	1	1	UK	1	24	45	0	0	737	1	0	0	0	999999999	999999999	0	0	3	0	999999999	11	Gov
591	1	1	1	UK	0	16	40	0	2	30	1	0	0	0	4	3	0	0	2	0	999999999	11	Private
592	1	1	1	UK	0	3	27	0	2	999999999	0	0	0	999999999	999999999	999999999	0	1	1	University or Vet School	7	11	PrivateUniResearchPath
593	1	1	1	UK	1	5	29	0	2	40	1	0	0	2	5	0	0	1	1	University or Vet School	7	11	Private
594	1	1	1	UK	1	13	35	1	2	40	1	1	0	0	1	3	0	1	2	University or Vet School	7	11	Private
595	1	1	1	UK	0	9	35	1	0	45	1	1	1	1	8	4	0	1	2	General veterinary or professional knowledge or verbal unknown	5	11	Private
596	1	1	1	UK	0	40	62	0	1	36	1	0	0	0	8	7	0	1	3	0	999999999	11	Private
597	1	1	1	UK	0	10	32	1	1	50	1	0	0	0	4	0	0	1	2	Publications, literature or journals	6	11	Private
598	1	1	1	UK	1	3	30	1	0	50	1	0	0	0	2	1	0	0	1	0	999999999	11	Private
600	1	1	1	UK	0	11	34	1	0	999999999	0	0	0	999999999	999999999	999999999	0	1	2	University or Vet School	7	11	Private
601	0	1	1	UK	1	6	32	0	2	999999999	0	0	0	999999999	999999999	999999999	0	0	1	0	999999999	11	Gov
602	1	1	1	UK	0	47	71	1	0	100	0	1	1	0	4	999999999	0	1	3	0	999999999	11	Private
603	1	1	1	UK	1	4	29	0	2	40	1	0	0	0	2	9	0	1	1	University or Vet School	7	11	Private
604	1	1	1	UK	1	7	31	0	0	150	1	1	0	2	0	4	0	1	1	Publications, literature or journals	6	11	Private
605	1	1	1	UK	1	29	50	0	0	15	1	0	0	9	8	5	0	1	3	Another discipline e.g. human medicine or science	1	11	Private
606	1	1	1	UK	1	19	44	0	0	35	1	1	0	0	2	5	0	1	2	CPD, Conferences, meetings, seminars or lectures	2	11	Private
607	1	1	1	UK	1	12	34	0	0	35	1	0	0	2	8	9	0	0	2	0	999999999	11	Private
608	1	1	1	UK	1	11	33	1	0	35	1	0	0	2	5	6	0	0	2	0	999999999	11	Private
609	1	1	1	UK	0	27	49	0	1	60	1	0	0	0	1	2	0	1	3	0	999999999	11	Private
610	1	1	1	UK	0	48	70	0	0	50	0	1	0	1	0	4	0	1	3	Publications, literature or journals	6	11	PrivateOther
611	1	1	1	UK	1	4	27	1	0	60	1	1	0	0	1	5	0	1	1	0	999999999	11	Private
612	0	1	1	UK	0	11	36	0	0	250	1	1	0	6	4	0	0	1	2	Publications, literature or journals	6	11	Path
613	0	1	1	UK	1	18	41	1	0	35	1	0	0	9	2	1	0	1	2	Publications, literature or journals	6	11	Path
614	0	1	1	UK	1	9	30	1	0	35	1	0	0	0	1	6	0	1	2	0	999999999	11	Path
615	1	1	1	UK	0	14	37	0	0	40	1	0	0	0	1	7	0	1	2	Don't know	1	11	Private
616	1	1	1	UK	0	45	66	1	1	999999999	0	0	0	999999999	999999999	999999999	0	1	3	Publications, literature or journals	6	11	Private
617	1	1	1	UK	1	5	29	0	1	35	1	1	1	0	7	5	0	1	1	0	999999999	11	Private
618	1	1	1	UK	1	30	58	1	0	40	0	1	0	0	9	1	0	1	3	Colleague or friend	5	11	Private
619	1	1	1	UK	0	37	59	0	1	35	1	0	0	0	7	8	0	1	3	0	999999999	11	Private
620	0	1	1	UK	0	42	64	0	0	30	1	0	0	0	4	1	0	1	3	Publications, literature or journals	6	11	Gov
622	1	1	1	UK	0	40	61	0	0	45	1	0	0	0	4	9	0	1	3	Ubiquitous or various and multiple sources	1	11	Private
623	1	1	1	UK	0	18	40	0	2	40	1	1	0	0	1	9	0	1	2	Publications, literature or journals	6	11	Private
624	1	1	1	UK	0	27	44	1	0	999999999	1	0	0	0	4	2	0	0	3	0	999999999	11	Private
625	1	1	1	UK	1	9	32	0	2	40	1	0	0	2	0	9	0	1	2	CPD, Conferences, meetings, seminars or lectures	2	11	Private
626	1	1	1	UK	0	12	35	0	0	20	1	0	0	0	1	4	0	1	2	CPD, Conferences, meetings, seminars or lectures	2	11	Private
627	1	1	1	UK	1	5	27	0	2	999999999	1	0	0	0	1	8	0	1	1	0	999999999	11	Private
628	1	1	1	UK	0	22	44	1	0	240	1	1	0	1	8	9	0	1	3	Veterinary Association	5	11	Private
629	1	1	1	UK	0	35	57	0	2	40	1	0	0	0	9	4	0	1	3	Publications, literature or journals	6	11	Private
630	1	1	1	UK	1	39	66	1	999999999	350	0	1	0	4	0	2	0	1	3	Work place or I teach it	4	11	PrivateUniResearchOther
631	1	1	1	UK	0	23	48	1	2	40	1	0	0	0	4	2	0	1	3	0	999999999	11	Private
632	1	1	1	UK	1	25	48	0	0	40	1	0	0	5	9	2	0	1	3	CPD, Conferences, meetings, seminars or lectures	2	11	Private
633	1	1	1	UK	1	16	39	0	2	30	1	0	0	9	0	4	0	1	2	Publications, literature or journals	6	11	Private
634	1	1	1	UK	0	19	41	1	0	40	1	0	0	0	1	5	0	1	2	Publications, literature or journals	6	11	Private
635	1	1	1	UK	1	25	46	0	0	40	1	0	0	0	4	6	0	1	3	CPD, Conferences, meetings, seminars or lectures	2	11	Private
636	1	1	1	UK	1	24	46	0	0	999999999	1	0	0	0	9	8	0	1	3	0	999999999	11	Private
637	1	1	1	UK	0	4	28	1	0	30	1	0	0	0	6	2	0	1	1	Work place or I teach it	4	11	Private
638	1	1	1	UK	1	4	27	0	0	10	1	1	0	0	4	5	0	1	1	University or Vet School	7	11	PrivateUni
639	1	1	1	UK	1	5	29	1	2	50	1	0	0	5	0	8	0	1	1	University or Vet School	7	11	Private
640	1	1	1	UK	0	1	30	1	0	35	1	0	0	1	0	2	0	1	1	0	999999999	11	Private
642	1	1	1	UK	1	3	25	0	2	35	1	0	0	1	0	2	0	1	1	0	999999999	11	Private
643	1	1	1	UK	1	8	32	0	1	35	1	0	0	9	0	4	0	1	2	Publications, literature or journals	6	11	Private
644	1	1	1	UK	0	31	53	0	1	40	1	1	0	1	0	5	0	1	3	CPD, Conferences, meetings, seminars or lectures	2	11	Private
645	1	1	1	UK	0	17	41	0	1	35	1	0	0	7	0	2	0	0	2	0	999999999	11	Private
646	1	1	1	UK	0	10	34	1	0	40	1	1	0	0	2	6	0	1	2	Publications, literature or journals	6	11	Private
647	1	1	1	UK	1	6	30	1	2	40	1	0	0	0	5	1	0	1	1	0	999999999	11	Private
648	1	1	1	UK	1	1	24	0	1	48	1	0	0	0	1	5	0	1	1	0	999999999	11	Private
649	1	1	1	UK	1	30	52	0	0	40	1	1	0	5	2	0	0	0	3	0	999999999	11	Private
650	1	1	1	UK	0	30	52	0	2	50	0	1	0	2	7	0	0	1	3	0	999999999	11	Private
651	1	1	1	UK	0	21	43	1	2	30	1	0	0	5	0	3	0	1	2	Another discipline e.g. human medicine or science	1	11	Private
652	1	1	1	UK	1	33	55	0	0	35	1	0	0	3	0	5	0	0	3	0	999999999	11	Private
653	0	1	1	UK	0	49	71	0	0	999999999	0	0	0	999999999	999999999	999999999	0	1	3	Publications, literature or journals	6	11	Private
654	1	1	1	UK	0	35	58	0	0	35	1	0	0	0	8	1	0	1	3	Publications, literature or journals	6	11	Private
655	1	1	1	UK	1	7	30	0	2	30	1	0	0	0	1	3	0	1	1	University or Vet School	7	11	Private
656	1	1	1	UK	1	3	26	0	999999999	20	1	1	0	0	1	2	0	1	1	University or Vet School	7	11	Private
657	1	1	1	UK	1	23	44	0	0	45	1	1	0	2	8	9	0	1	3	0	999999999	11	Private
658	1	1	1	UK	0	16	39	1	1	50	1	0	0	1	0	5	0	1	2	0	999999999	11	Private
659	1	1	1	UK	1	3	27	1	1	35	1	0	0	0	1	9	0	1	1	0	999999999	11	Private
660	1	1	1	UK	0	34	56	0	0	45	1	1	1	0	9	5	0	1	3	Specialist organisation, research centre or referral clinic	5	11	Private
661	1	1	1	UK	1	26	49	1	999999999	35	1	1	0	0	3	5	0	1	3	0	999999999	11	Private
662	1	1	1	UK	1	11	34	0	0	25	1	0	0	0	5	2	0	0	2	0	999999999	11	Private
663	1	1	1	UK	1	4	28	0	0	35	1	0	0	0	1	9	0	1	1	University or Vet School	7	11	Private
664	1	1	1	UK	0	4	27	0	0	150	1	0	0	0	1	2	0	1	1	University or Vet School	7	11	Private
665	1	1	1	UK	1	5	31	1	0	40	0	1	0	0	1	8	0	0	1	0	999999999	11	Private
666	1	1	1	UK	1	21	43	0	0	50	1	1	0	9	0	2	0	1	2	0	999999999	11	Charity
667	1	1	1	UK	1	6	29	0	0	35	1	0	0	0	8	2	0	1	1	CPD, Conferences, meetings, seminars or lectures	2	11	Private
668	1	1	1	UK	1	16	38	0	0	40	1	0	0	1	9	4	0	1	2	CPD, Conferences, meetings, seminars or lectures	2	11	Private
669	1	1	1	UK	0	6	29	0	1	30	1	1	0	6	0	2	0	1	1	University or Vet School	7	11	Private
670	0	1	1	UK	1	8	31	1	0	50	1	0	0	1	4	9	0	1	2	Veterinary Association	5	11	Uni
671	1	1	1	UK	1	2	24	0	0	80	1	0	0	0	1	4	0	1	1	0	999999999	11	Private
672	0	1	1	UK	1	8	31	1	0	500	1	1	0	0	9	2	0	0	2	0	999999999	11	Public
673	1	1	1	UK	1	7	30	0	2	50	1	0	0	0	2	3	0	0	1	0	999999999	11	Private
674	1	1	1	UK	0	6	30	0	0	30	1	0	1	2	5	0	0	1	1	0	999999999	11	Private
675	1	1	1	UK	1	22	45	1	2	40	0	1	0	0	2	1	0	1	3	CPD, Conferences, meetings, seminars or lectures	2	11	Private
676	1	1	1	UK	1	5	28	0	0	30	1	0	0	0	1	9	0	1	1	0	999999999	11	Private
677	1	1	1	UK	1	19	41	1	0	20	1	1	1	2	0	9	0	1	2	PG or specialist study or personal research	4	11	Private
678	1	1	1	UK	1	999999999	999999999	0	1	40	0	1	0	1	4	5	0	1	999999999	Publications, literature or journals	6	11	PrivateOther
679	1	1	1	UK	1	2	25	0	0	20	1	1	0	0	1	9	0	1	1	University or Vet School	7	11	Private
680	1	1	1	UK	1	11	32	0	0	50	1	0	0	2	0	9	0	1	2	PG or specialist study or personal research	4	11	Industry
681	1	1	1	UK	0	42	64	0	1	75	0	1	0	4	2	6	0	1	3	Publications, literature or journals	6	11	Private
682	1	1	1	UK	1	9	32	0	0	25	1	0	1	0	1	9	0	1	2	0	999999999	11	Private
683	1	1	1	UK	1	11	34	0	0	350	1	0	0	2	0	4	0	1	2	General veterinary or professional knowledge or verbal unknown	5	11	Private
684	1	1	1	UK	1	3	25	0	0	40	1	0	0	0	1	4	0	1	1	University or Vet School	7	11	Private
685	1	1	1	UK	1	22	44	0	1	35	0	1	0	0	1	10	0	1	3	0	999999999	11	Private
686	1	1	1	UK	0	35	58	0	999999999	60	1	0	0	0	6	8	0	1	3	General veterinary or professional knowledge or verbal unknown	5	11	Private
687	1	1	1	UK	1	3	26	0	0	30	1	0	0	0	9	5	0	1	1	PG or specialist study or personal research	4	11	Private
688	1	1	1	UK	1	20	42	1	2	50	0	1	0	4	1	0	0	1	2	Publications, literature or journals	6	11	Private
689	1	1	1	UK	0	14	38	0	0	100	0	1	0	0	1	2	0	1	2	University or Vet School	7	11	PrivateCharity
690	1	1	1	UK	1	33	54	1	0	35	0	1	0	3	2	0	0	1	3	0	999999999	11	Private
691	1	1	1	UK	1	2	24	0	0	30	1	0	0	0	1	9	0	1	1	University or Vet School	7	11	Private
692	0	1	1	UK	1	20	44	1	0	6	1	1	0	5	4	3	0	1	2	Publications, literature or journals	6	11	Industry
693	1	1	1	UK	1	32	55	0	0	65	0	1	0	0	9	5	0	1	3	Publications, literature or journals	6	11	Private
694	1	1	1	UK	1	14	35	1	0	35	1	0	0	1	0	4	0	1	2	Colleague or friend	5	11	Private
695	1	1	1	UK	0	20	43	1	0	36	1	1	0	2	0	7	0	1	2	CPD, Conferences, meetings, seminars or lectures	2	11	Private
696	1	1	1	UK	1	11	33	1	0	40	1	1	0	0	2	1	0	1	2	0	999999999	11	Private
697	1	1	1	UK	0	14	37	0	0	35	1	0	0	9	8	2	0	1	2	Publications, literature or journals	6	11	Private
698	1	1	1	UK	0	4	28	1	0	50	1	0	0	0	1	9	0	1	1	University or Vet School	7	11	Private
699	1	1	1	UK	0	23	44	1	1	49	1	0	0	4	6	1	0	1	3	0	999999999	11	Private
700	1	1	1	UK	0	28	51	1	0	35	1	0	0	6	0	4	0	1	3	Veterinary Association	5	11	Private
701	1	1	1	UK	1	1	24	0	0	999999999	1	0	0	2	0	4	0	1	1	University or Vet School	7	11	Private
702	1	1	1	UK	0	21	44	0	0	150	0	1	0	3	5	3	0	1	2	0	999999999	11	Private
703	1	1	1	UK	1	27	999999999	0	1	50	1	1	0	5	0	2	0	0	3	0	999999999	11	Private
704	1	1	1	UK	1	11	34	0	0	35	1	0	0	9	0	1	0	1	2	Publications, literature or journals	6	11	Private
705	1	1	1	UK	1	12	35	0	2	35	1	0	0	2	0	5	0	1	2	University or Vet School	7	11	Private
706	1	1	1	UK	0	11	34	0	2	45	1	1	1	2	9	0	0	1	2	University or Vet School	7	11	Private
707	1	1	1	UK	1	8	30	0	0	35	1	1	0	0	1	6	0	1	2	0	999999999	11	Private
708	1	1	1	UK	1	6	29	0	0	200	1	1	0	2	0	8	0	1	1	0	999999999	11	Private
711	1	1	1	UK	1	2	25	0	0	90	1	0	0	0	5	7	0	1	1	0	999999999	11	Private
713	1	1	1	UK	1	19	45	1	0	50	1	0	0	0	1	2	0	1	2	Publications, literature or journals	6	11	Private
714	1	1	1	UK	0	5	27	0	2	30	1	0	0	0	9	5	0	1	1	0	999999999	11	Private
715	1	1	1	UK	1	4	26	0	0	50	1	1	0	1	3	0	0	1	1	0	999999999	11	Private
716	1	1	1	UK	1	9	33	1	1	40	1	1	0	6	1	4	0	1	2	University or Vet School	7	11	Uni
717	1	1	1	UK	1	23	47	0	0	30	1	0	1	6	0	9	0	1	3	0	999999999	11	Private
718	1	1	1	UK	1	5	28	0	1	34	0	1	0	0	2	1	0	1	1	0	999999999	11	Private
719	1	1	1	UK	1	13	39	1	0	45	1	1	0	1	4	0	0	1	2	Colleague or friend	5	11	Private
720	1	1	1	UK	0	7	30	0	0	60	1	0	0	0	9	1	0	1	1	Publications, literature or journals	6	11	Private
721	1	1	1	UK	0	11	33	1	0	36	1	0	0	0	2	7	0	1	2	Publications, literature or journals	6	11	PrivatePublicOutside
722	1	1	1	UK	0	48	72	1	0	40	0	1	0	1	0	4	0	1	3	Veterinary Association	5	11	Other
723	1	1	1	UK	1	1	23	0	0	60	1	1	0	0	1	4	0	1	1	University or Vet School	7	11	Private
724	1	1	1	UK	0	6	29	0	2	70	1	1	0	5	5	9	0	1	1	0	999999999	11	Private
725	1	1	1	UK	0	28	51	0	1	35	1	0	0	0	1	2	0	1	3	0	999999999	11	Private
726	0	1	1	UK	1	10	43	0	2	20	1	0	0	0	5	9	0	0	2	0	999999999	11	Gov
727	1	1	1	UK	0	3	26	0	0	35	1	0	0	0	4	8	0	1	1	University or Vet School	7	11	Private
728	1	1	1	UK	1	12	33	1	2	50	1	1	0	4	1	7	0	1	2	University or Vet School	7	11	Private
729	1	1	1	UK	0	13	35	1	0	100	1	0	0	1	0	4	0	1	2	PG or specialist study or personal research	4	11	Private
730	1	1	1	UK	1	17	40	1	0	60	1	0	0	1	4	6	0	1	2	0	999999999	11	Private
731	1	1	1	UK	1	27	51	1	0	150	1	1	1	0	1	3	0	1	3	CPD, Conferences, meetings, seminars or lectures	2	11	Private
732	1	1	1	UK	0	17	38	1	2	60	1	1	0	0	1	2	0	1	2	0	999999999	11	PrivateOther
733	1	1	1	UK	1	13	37	1	0	35	1	0	0	0	6	7	0	1	2	0	999999999	11	Private
734	1	1	1	UK	0	14	36	0	0	40	1	0	0	0	4	6	0	1	2	CPD, Conferences, meetings, seminars or lectures	2	11	Private
735	1	1	1	UK	1	6	29	1	0	100	1	1	0	7	2	3	0	1	1	0	999999999	11	Charity
736	1	1	1	UK	0	33	55	0	0	40	0	1	0	5	0	2	0	1	3	0	999999999	11	Private
737	1	1	1	UK	1	24	47	0	0	40	1	0	0	0	2	4	0	1	3	Publications, literature or journals	6	11	Private
738	1	1	1	UK	1	3	28	0	0	20	1	0	0	0	8	3	0	1	1	University or Vet School	7	11	Private
739	1	1	1	UK	1	5	29	0	1	25	1	0	0	0	5	1	0	1	1	0	999999999	11	Charity
740	1	1	1	UK	0	31	54	0	0	15	1	0	1	0	5	6	0	1	3	Publications, literature or journals	6	11	Private
741	1	1	1	UK	0	25	49	0	999999999	35	1	0	0	1	0	6	0	1	3	RCVS standards or practice audit	5	11	Private
742	1	1	1	UK	0	8	31	1	0	100	1	1	0	0	1	8	0	1	2	University or Vet School	7	11	Private
743	1	1	1	UK	0	28	50	1	0	50	1	1	0	1	0	6	0	1	3	Publications, literature or journals	6	11	Private
744	1	1	1	UK	1	4	31	1	2	100	0	1	0	2	7	3	0	1	1	University or Vet School	7	11	Private
745	1	1	1	UK	1	6	30	0	1	999999999	1	1	0	1	0	4	0	1	1	0	999999999	11	Research
746	1	1	1	UK	1	35	57	1	0	40	1	0	0	0	4	7	0	1	3	CPD, Conferences, meetings, seminars or lectures	2	11	Private
747	1	1	1	UK	0	4	27	0	0	60	0	0	1	0	1	2	0	0	1	0	999999999	11	Private
748	1	1	1	UK	0	17	39	0	0	30	0	1	0	2	6	7	0	1	2	Publications, literature or journals	6	11	Private
749	1	1	1	UK	1	20	44	1	0	50	1	1	0	2	1	4	0	1	2	Work place or I teach it	4	11	Uni
750	1	1	1	UK	1	3	26	0	0	30	1	0	0	0	9	1	0	1	1	0	999999999	11	Private
751	0	1	1	UK	1	18	40	1	0	40	0	1	0	1	6	4	0	1	2	Don't know	1	11	Industry
752	1	1	1	UK	1	7	36	1	0	40	1	0	0	0	2	5	0	1	1	Another discipline e.g. human medicine or science	1	11	Private
753	1	1	1	UK	0	24	46	0	0	40	0	1	0	0	4	5	0	1	3	Publications, literature or journals	6	11	PrivateCharity
754	1	1	1	UK	1	5	33	1	0	35	1	0	0	2	0	999999999	0	1	1	0	999999999	11	Private
755	1	1	1	UK	1	10	31	0	0	90	0	1	1	0	2	4	0	1	2	University or Vet School	7	11	PrivateCharity
756	1	1	1	UK	1	7	30	0	1	40	1	0	0	0	1	2	0	1	1	University or Vet School	7	11	Charity
757	1	1	1	UK	0	20	43	1	1	45	1	0	0	1	0	9	0	1	2	Publications, literature or journals	6	11	Private
758	1	1	1	UK	1	10	34	1	1	25	1	1	0	0	5	9	0	1	2	University or Vet School	7	11	Private
759	1	1	1	UK	1	24	52	0	0	40	1	1	0	8	0	1	0	1	3	0	999999999	11	Private
760	1	1	1	UK	1	8	30	0	0	40	1	1	0	0	4	2	0	1	2	University or Vet School	7	11	Charity
761	1	1	1	UK	1	12	34	1	0	50	1	0	0	0	1	4	0	1	2	Specialist organisation, research centre or referral clinic	5	11	Private
762	1	1	1	UK	0	19	41	1	0	60	1	0	0	9	4	7	0	1	2	Publications, literature or journals	6	11	Private
763	1	1	1	UK	1	6	29	0	2	50	1	1	0	0	1	2	0	1	1	University or Vet School	7	11	Private
764	1	1	1	UK	1	8	31	0	0	30	1	0	0	2	5	8	0	1	2	0	999999999	11	Private
765	1	1	1	UK	1	13	35	1	0	50	1	0	0	0	4	2	0	1	2	0	999999999	11	Private
766	1	1	1	UK	1	4	28	0	1	150	1	1	0	0	2	1	0	1	1	0	999999999	11	Private
767	1	1	1	UK	1	33	56	0	0	35	1	0	0	0	2	5	0	1	3	CPD, Conferences, meetings, seminars or lectures	2	11	Private
768	1	1	1	UK	1	2	23	0	0	30	1	0	0	8	0	5	0	0	1	0	999999999	11	Private
769	1	1	1	UK	1	7	29	0	0	40	1	1	0	0	5	6	0	1	1	0	999999999	11	Private
770	1	1	1	UK	1	11	35	0	0	35	1	0	0	0	2	1	0	1	2	Publications, literature or journals	6	11	Private
771	1	1	1	UK	1	14	39	1	0	35	1	1	0	0	9	2	0	1	2	Publications, literature or journals	6	11	PrivateCharity
772	1	1	1	UK	1	3	26	1	0	50	1	1	0	0	1	4	0	1	1	Colleague or friend	5	11	Private
773	1	1	1	UK	1	11	35	0	0	50	0	1	0	2	0	5	0	1	2	0	999999999	11	Private
774	1	1	1	UK	1	41	65	0	0	35	1	0	0	0	1	9	0	1	3	Publications, literature or journals	6	11	Private
775	1	1	1	UK	1	3	25	0	2	35	1	0	0	0	1	9	0	1	1	0	999999999	11	Private
776	0	1	1	UK	0	14	36	1	0	30	1	1	0	4	1	6	0	1	2	University or Vet School	7	11	Research
777	1	1	1	UK	1	3	27	1	1	40	1	0	0	0	7	5	0	1	1	University or Vet School	7	11	Private
778	1	1	1	UK	1	14	36	0	0	35	1	0	0	2	7	9	0	1	2	Work place or I teach it	4	11	Uni
779	1	1	1	UK	1	11	33	0	0	30	1	1	0	0	2	9	0	1	2	Publications, literature or journals	6	11	Private
780	1	1	1	UK	1	22	42	1	0	30	1	1	0	1	0	4	0	1	3	Publications, literature or journals	6	11	Private
781	1	1	1	UK	1	6	30	0	0	35	1	1	0	0	4	2	0	1	1	University or Vet School	7	11	Charity
782	1	1	1	UK	0	29	53	0	0	60	1	0	0	0	4	5	0	1	3	Colleague or friend	5	11	Private
783	1	1	1	UK	0	23	45	0	0	100	1	0	0	2	1	9	0	1	3	PG or specialist study or personal research	4	11	Private
784	1	1	1	UK	1	3	26	1	2	35	1	1	1	0	1	5	0	1	1	0	999999999	11	Private
785	1	1	1	UK	1	6	29	1	2	40	1	0	0	0	9	4	0	1	1	University or Vet School	7	11	Private
786	1	1	1	UK	0	32	54	0	0	25	1	0	0	0	3	1	0	1	3	0	999999999	11	Private
787	1	1	1	UK	0	16	35	0	2	30	1	1	0	0	1	8	0	1	2	0	999999999	11	Private
788	1	1	1	UK	1	9	32	1	999999999	40	1	1	0	0	9	1	0	1	2	0	999999999	11	Private
789	1	1	1	UK	1	6	29	0	0	38	1	0	0	0	1	7	0	1	1	0	999999999	11	Private
790	1	1	1	UK	0	1	23	1	0	20	1	0	0	0	1	2	0	1	1	0	999999999	11	Private
791	1	1	1	UK	0	29	51	0	0	50	1	1	1	1	2	8	0	1	3	CPD, Conferences, meetings, seminars or lectures	2	11	PrivateCharityOutside
792	0	1	1	UK	0	35	57	0	0	30	1	1	0	0	6	1	0	1	3	Publications, literature or journals	6	11	GovIndustry
793	1	1	1	UK	1	6	29	0	999999999	15	0	1	0	0	2	3	0	1	1	University or Vet School	7	11	Private
794	0	1	1	UK	1	30	53	0	1	35	0	1	0	1	0	4	0	1	3	Another discipline e.g. human medicine or science	1	11	Gov
796	0	1	1	UK	0	25	57	1	0	35	1	1	0	0	1	4	0	1	3	Publications, literature or journals	6	11	Gov
797	1	1	1	UK	1	32	52	0	0	36	1	0	0	1	5	999999999	0	1	3	Publications, literature or journals	6	11	Private
798	1	1	1	UK	1	8	31	0	0	50	1	0	0	0	1	4	0	1	2	University or Vet School	7	11	Private
799	1	1	1	UK	1	21	45	0	0	45	1	1	0	2	1	4	0	1	2	Publications, literature or journals	6	11	Private
800	1	1	1	UK	0	2	24	0	1	35	0	1	0	0	2	5	0	1	1	University or Vet School	7	11	Private
801	1	1	1	UK	1	3	26	0	0	30	1	0	0	9	1	0	0	1	1	University or Vet School	7	11	Private
802	0	1	1	UK	1	11	34	1	2	50	1	0	0	0	2	7	0	0	2	0	999999999	11	Public
803	1	1	1	UK	0	11	35	0	0	35	0	1	0	0	1	4	0	1	2	CPD, Conferences, meetings, seminars or lectures	2	11	Private
804	1	1	1	UK	0	3	26	0	0	50	1	1	1	0	1	4	0	1	1	University or Vet School	7	11	PrivateCharity
805	1	1	1	UK	0	24	46	0	0	45	1	1	0	5	2	9	0	1	3	Publications, literature or journals	6	11	Private
806	1	1	1	UK	1	5	29	0	2	45	1	0	0	0	1	9	0	1	1	University or Vet School	7	11	Private
807	1	1	1	UK	1	21	43	0	0	20	1	0	0	0	1	9	0	0	2	0	999999999	11	Private
808	0	1	1	UK	1	17	40	1	0	50	1	0	1	0	9	8	0	1	2	Veterinary Association	5	11	GovPath
809	1	1	1	UK	1	6	29	0	2	35	0	1	0	2	0	1	0	1	1	University or Vet School	7	11	Private
810	1	1	1	UK	1	5	30	1	2	4	1	0	0	0	5	2	0	1	1	University or Vet School	7	11	Private
811	1	1	1	UK	0	34	56	1	0	80	0	1	0	1	4	0	0	1	3	Ubiquitous or various and multiple sources	1	11	Private
813	1	1	1	UK	0	8	32	1	0	50	0	1	0	1	6	4	0	1	2	0	999999999	11	Private
814	1	1	1	UK	0	26	48	0	1	40	1	0	0	1	4	0	0	1	3	Publications, literature or journals	6	11	Private
815	1	1	1	UK	0	34	57	0	0	35	1	0	0	0	9	8	0	1	3	Colleague or friend	5	11	Private
816	1	1	1	UK	0	20	47	0	0	50	1	0	0	0	5	8	0	0	2	0	999999999	11	Private
817	1	1	1	UK	1	2	25	0	0	37	1	0	0	0	5	2	0	1	1	0	999999999	11	PrivateCharity
819	1	1	1	UK	0	13	41	1	0	20	0	0	1	1	4	5	0	1	2	Publications, literature or journals	6	11	UniResearch
821	1	1	1	UK	1	13	37	0	0	35	1	0	0	0	2	7	0	1	2	University or Vet School	7	11	Private
822	1	1	1	UK	1	8	31	0	0	20	1	1	0	1	4	7	0	1	2	0	999999999	11	Industry
823	1	1	1	UK	1	15	39	0	0	35	1	0	0	0	1	5	0	1	2	Publications, literature or journals	6	11	Charity
824	1	1	1	UK	1	3	34	0	0	30	1	1	0	0	3	8	0	1	1	0	999999999	11	Private
825	1	1	1	UK	1	3	28	0	0	18	1	0	0	0	9	4	0	1	1	0	999999999	11	Private
826	1	1	1	UK	1	7	31	1	0	50	1	1	0	1	0	2	0	1	1	University or Vet School	7	11	Private
827	1	1	1	UK	1	25	47	1	0	50	1	1	0	4	1	6	0	1	3	Another discipline e.g. human medicine or science	1	11	Uni
828	0	1	1	UK	1	11	32	1	0	50	1	1	0	0	1	9	0	1	2	PG or specialist study or personal research	4	11	Research
829	0	1	1	UK	1	22	44	1	1	999999999	0	0	0	999999999	999999999	999999999	0	1	3	Blank or invalid answer	1	11	Research
830	0	1	1	UK	1	29	50	1	0	60	1	0	0	1	2	7	0	1	3	Work place or I teach it	4	11	Uni
831	1	1	1	UK	1	2	25	0	2	35	1	1	0	0	2	1	0	1	1	University or Vet School	7	11	Private
832	1	1	1	UK	0	1	25	1	0	12	1	0	0	0	1	5	0	1	1	University or Vet School	7	11	Private
833	0	1	1	UK	1	9	33	1	1	999999999	0	0	0	999999999	999999999	999999999	0	1	2	University or Vet School	7	11	Research
834	1	1	1	UK	1	6	32	1	0	40	1	1	1	0	1	4	0	1	1	University or Vet School	7	11	PrivateResearch
835	0	1	1	UK	0	54	77	1	0	100	0	1	0	4	7	0	0	1	3	General veterinary or professional knowledge or verbal unknown	5	11	PathOther
836	1	1	1	UK	1	24	49	1	0	90	1	1	1	4	0	1	0	1	3	Work place or I teach it	4	11	UniResearch
837	1	1	1	UK	1	33	56	1	0	100	0	1	0	0	1	2	0	1	3	Colleague or friend	5	11	UniResearchOther
838	1	1	1	UK	0	19	42	1	1	40	1	1	0	1	1	6	0	1	2	PG or specialist study or personal research	4	11	Uni
839	1	1	1	UK	1	4	27	0	0	80	1	1	0	0	6	1	0	1	1	University or Vet School	7	11	Uni
840	1	1	1	UK	0	8	30	1	0	100	1	1	0	0	0	6	0	1	2	Ubiquitous or various and multiple sources	1	11	Research
841	1	1	1	UK	1	4	35	1	1	700	1	1	0	2	4	1	0	1	1	0	999999999	11	Uni
842	1	1	1	UK	0	7	29	1	0	100	1	1	1	1	4	6	0	1	1	University or Vet School	7	11	Uni
843	1	1	1	UK	1	5	28	1	0	30	1	0	0	0	2	9	0	1	1	PG or specialist study or personal research	4	11	Uni
844	1	1	1	UK	1	4	27	1	2	80	1	1	1	0	1	9	0	1	1	0	999999999	11	PrivateUni
845	1	1	1	UK	1	8	30	1	0	40	1	1	0	0	1	4	0	1	2	0	999999999	11	Uni
846	1	1	1	UK	0	8	33	0	0	80	1	1	0	4	6	8	0	1	2	Publications, literature or journals	6	11	Uni
847	0	1	1	UK	1	7	30	1	0	999999999	0	0	0	999999999	999999999	999999999	0	1	1	Publications, literature or journals	6	11	Research
848	1	1	1	UK	1	5	28	0	0	70	0	0	1	0	9	2	0	1	1	Work place or I teach it	4	11	Uni
849	0	1	1	UK	1	17	44	1	0	999999999	0	0	0	999999999	999999999	999999999	0	1	2	0	999999999	11	UniResearch
850	0	1	1	UK	1	34	56	1	1	60	1	0	0	0	4	6	0	1	3	Publications, literature or journals	6	11	Path
852	1	1	1	UK	1	33	56	0	2	30	1	0	0	8	0	6	0	0	3	0	999999999	11	Private
853	0	1	1	UK	1	10	35	1	0	30	1	1	0	2	9	0	0	0	2	0	999999999	11	Public
854	1	1	1	UK	1	6	28	0	1	30	0	1	0	4	2	0	0	1	1	0	999999999	11	Private
855	1	1	1	UK	1	3	26	0	0	35	1	0	0	2	0	9	0	0	1	0	999999999	11	Private
856	1	1	1	UK	1	2	26	1	2	40	1	0	0	1	2	4	0	1	1	Publications, literature or journals	6	11	Private
857	1	1	1	UK	1	4	26	0	0	40	1	1	0	0	8	2	0	1	1	0	999999999	11	Private
858	1	1	1	UK	1	4	29	0	2	40	1	0	0	9	1	0	0	1	1	University or Vet School	7	11	Private
859	1	1	1	UK	0	25	47	1	0	35	1	0	0	0	1	4	0	1	3	Publications, literature or journals	6	11	Private
860	1	1	1	UK	1	9	35	1	0	200	1	1	0	2	4	5	0	1	2	University or Vet School	7	11	Research
861	1	1	1	UK	0	27	51	1	0	35	1	0	0	1	4	0	0	1	3	CPD, Conferences, meetings, seminars or lectures	2	11	Private
862	0	1	1	UK	1	4	23	1	0	70	1	0	0	1	0	2	0	1	1	PG or specialist study or personal research	4	11	ResearchOther
863	1	1	1	UK	0	2	25	0	0	40	1	0	0	0	1	7	0	1	1	University or Vet School	7	11	Private
864	1	1	1	UK	1	13	37	0	2	35	1	0	0	1	0	8	0	0	2	0	999999999	11	Private
865	1	1	1	UK	1	5	28	0	1	35	1	1	0	9	0	2	0	1	1	0	999999999	11	Private
866	1	1	1	UK	1	4	27	0	2	25	1	1	0	0	2	5	0	1	1	0	999999999	11	Private
867	1	1	1	UK	1	32	54	1	1	40	1	0	0	4	5	6	0	1	3	Publications, literature or journals	6	11	Private
868	1	1	1	UK	1	10	31	0	0	35	1	0	0	0	1	2	0	1	2	University or Vet School	7	11	Private
869	1	1	1	UK	1	28	50	0	0	50	0	1	0	1	9	0	0	1	3	General veterinary or professional knowledge or verbal unknown	5	11	Other
870	1	1	1	UK	1	13	38	1	2	40	1	0	0	0	9	6	0	1	2	CPD, Conferences, meetings, seminars or lectures	2	11	Charity
871	1	1	1	UK	0	12	39	1	999999999	32	1	1	0	0	1	9	0	1	2	0	999999999	11	Private
872	1	1	1	UK	0	37	61	0	0	35	0	1	0	0	5	6	0	1	3	General veterinary or professional knowledge or verbal unknown	5	11	Private
873	1	1	1	UK	1	5	29	1	0	24	1	0	0	9	1	0	0	1	1	University or Vet School	7	11	Private
874	1	1	1	UK	1	15	38	0	2	35	1	1	0	0	2	999999999	0	1	2	Publications, literature or journals	6	11	Private
875	1	1	1	UK	1	5	29	0	2	15	1	0	0	3	2	4	0	1	1	0	999999999	11	Private
876	1	1	1	UK	1	3	25	0	1	30	1	0	0	0	2	3	0	1	1	0	999999999	11	Private
878	1	1	1	UK	1	7	29	0	0	40	1	0	0	0	6	4	0	1	1	University or Vet School	7	11	Charity
880	1	1	1	UK	0	42	65	1	0	50	1	1	0	0	4	9	0	1	3	CPD, Conferences, meetings, seminars or lectures	2	11	Private
882	1	1	1	UK	1	32	56	0	2	40	1	0	0	5	0	1	0	1	3	Publications, literature or journals	6	11	Private
883	1	1	1	UK	0	27	49	0	0	50	1	1	0	0	9	8	0	1	3	Publications, literature or journals	6	11	Private
884	0	1	1	UK	0	36	57	1	2	50	1	0	0	0	4	1	0	1	3	Publications, literature or journals	6	11	Industry
885	1	1	1	UK	0	14	36	0	0	25	1	1	0	0	9	1	0	1	2	Publications, literature or journals	6	11	Private
886	1	1	1	UK	1	6	28	0	1	130	1	0	0	0	1	8	0	1	1	University or Vet School	7	11	Private
887	1	1	1	UK	0	9	31	0	2	35	1	0	0	0	1	9	0	1	2	0	999999999	11	Private
888	1	1	1	UK	1	7	31	0	0	45	1	1	0	9	0	1	0	1	1	Veterinary Association	5	11	Private
889	1	1	1	UK	1	4	26	0	0	35	1	0	0	0	1	4	0	1	1	0	999999999	11	Private
890	1	1	1	UK	1	3	26	0	1	50	1	1	1	0	8	9	0	1	1	University or Vet School	7	11	Private
891	1	1	1	UK	1	19	47	1	0	40	1	1	0	0	1	3	0	1	2	Work place or I teach it	4	11	Private
892	1	1	1	UK	0	1	23	0	0	15	1	1	0	0	1	2	0	1	1	University or Vet School	7	11	Private
893	1	1	1	UK	0	33	56	0	0	50	1	0	0	1	0	9	0	1	3	CPD, Conferences, meetings, seminars or lectures	2	11	Private
894	1	1	1	UK	1	26	49	1	0	35	1	0	0	0	9	5	0	1	3	CPD, Conferences, meetings, seminars or lectures	2	11	Private
895	1	1	1	UK	1	7	30	0	0	45	1	0	0	0	3	2	0	1	1	University or Vet School	7	11	Charity
896	1	1	1	UK	1	33	50	1	2	60	1	1	0	0	2	4	0	1	3	Ubiquitous or various and multiple sources	1	11	Private
897	1	1	1	UK	1	9	31	0	0	30	1	0	0	0	1	8	0	1	2	0	999999999	11	Private
898	1	1	1	UK	1	4	27	0	1	35	1	1	0	0	1	9	0	1	1	University or Vet School	7	11	Private
899	1	1	1	UK	1	18	41	0	0	50	1	0	0	2	0	4	0	1	2	University or Vet School	7	11	Private
900	1	1	1	UK	0	34	56	1	0	80	1	1	0	0	1	4	0	1	3	Publications, literature or journals	6	11	Private
901	1	1	1	UK	0	26	49	0	0	75	1	1	0	0	1	9	0	1	3	General veterinary or professional knowledge or verbal unknown	5	11	Private
902	1	1	1	UK	0	9	30	0	0	150	1	0	0	2	4	0	0	1	2	University or Vet School	7	11	Private
903	1	1	1	UK	0	25	47	0	0	38	1	1	0	0	3	9	0	1	3	Publications, literature or journals	6	11	Private
904	1	1	1	UK	1	33	58	0	0	10	1	1	0	0	2	1	0	1	3	0	999999999	11	Private
905	1	1	1	UK	0	9	31	0	1	40	1	0	0	2	3	7	0	1	2	University or Vet School	7	11	Private
906	1	1	1	UK	0	9	31	1	1	100	1	0	1	1	4	0	0	1	2	Publications, literature or journals	6	11	Gov
907	1	1	1	UK	1	9	31	0	2	999999999	1	0	0	9	0	7	0	0	2	0	999999999	11	Private
908	1	1	1	UK	0	31	53	1	0	45	1	1	0	0	1	6	0	1	3	Publications, literature or journals	6	11	Private
909	1	1	1	UK	1	11	33	0	2	35	1	1	0	0	1	3	0	1	2	CPD, Conferences, meetings, seminars or lectures	2	11	Private
910	1	1	1	UK	0	29	50	0	2	40	1	0	0	8	9	0	0	0	3	0	999999999	11	Private
911	1	1	1	UK	1	8	33	0	0	35	1	1	0	5	7	0	0	1	2	University or Vet School	7	11	Private
912	1	1	1	UK	0	30	52	0	0	35	1	0	0	0	5	9	0	0	3	0	999999999	11	Private
913	1	1	1	UK	1	4	26	0	2	100	1	0	0	4	0	9	0	1	1	0	999999999	11	Private
914	1	1	1	UK	1	16	38	0	0	40	1	1	0	0	9	5	0	1	2	Publications, literature or journals	6	11	Private
915	1	1	1	UK	1	17	39	0	1	40	1	1	0	0	2	3	0	1	2	CPD, Conferences, meetings, seminars or lectures	2	11	Private
916	1	1	1	UK	1	13	37	1	0	15	1	1	0	2	0	4	0	1	2	CPD, Conferences, meetings, seminars or lectures	2	11	Private
917	1	1	1	UK	0	35	60	0	0	999999999	0	1	0	0	5	2	0	0	3	0	999999999	11	BreakOther
918	1	1	1	UK	1	4	28	0	0	50	1	1	0	4	0	0	0	1	1	PG or specialist study or personal research	4	11	Private
919	1	1	1	UK	1	10	35	1	0	35	1	0	0	0	1	2	0	1	2	0	999999999	11	Private
920	1	1	1	UK	0	5	27	1	0	40	1	0	0	1	0	2	0	1	1	0	999999999	11	Private
921	1	1	1	UK	1	12	34	1	0	40	1	1	0	9	0	2	0	1	2	CPD, Conferences, meetings, seminars or lectures	2	11	Private
922	1	1	1	UK	1	16	39	1	0	70	1	1	0	0	9	4	0	1	2	Don't know	1	11	PrivateUni
923	1	1	1	UK	0	15	37	1	0	40	1	0	0	0	5	6	0	1	2	Publications, literature or journals	6	11	Private
924	1	1	1	UK	0	10	34	1	0	30	1	0	0	0	6	4	0	1	2	Publications, literature or journals	6	11	Private
925	1	1	1	UK	0	7	30	0	0	40	1	0	0	0	1	4	0	1	1	0	999999999	11	Private
926	1	1	1	UK	0	5	28	0	0	45	1	1	1	0	1	4	0	1	1	University or Vet School	7	11	Private
927	1	1	1	UK	1	1	23	0	0	999999999	0	0	0	0	9	4	0	1	1	University or Vet School	7	11	Uni
928	1	1	1	UK	0	2	24	0	1	35	1	0	0	0	4	1	0	1	1	University or Vet School	7	11	Private
929	1	1	1	UK	0	36	58	0	0	80	1	0	0	0	4	9	0	1	3	Publications, literature or journals	6	11	Private
930	1	1	1	UK	1	6	33	1	1	36	1	0	0	0	9	8	0	1	1	University or Vet School	7	11	Private
931	1	1	1	UK	0	23	44	0	0	100	1	0	0	0	1	9	0	1	3	CPD, Conferences, meetings, seminars or lectures	2	11	Private
932	1	1	1	UK	1	2	27	1	0	45	1	1	0	0	1	2	0	1	1	University or Vet School	7	11	Private
933	1	1	1	UK	1	3	28	1	0	20	1	0	0	9	0	2	0	1	1	0	999999999	11	Private
934	1	1	1	UK	1	1	23	0	0	35	1	0	0	9	0	2	0	1	1	0	999999999	11	Private
936	1	1	1	UK	1	28	49	0	1	40	1	0	0	0	5	1	0	1	3	Publications, literature or journals	6	11	Charity
937	1	1	1	UK	0	8	31	0	1	30	1	0	0	0	2	3	0	1	2	0	999999999	11	Private
938	1	1	1	UK	0	19	42	0	2	35	1	1	1	9	5	6	0	1	2	0	999999999	11	Private
939	1	1	1	UK	1	7	40	0	0	60	1	1	0	0	1	2	0	1	1	Publications, literature or journals	6	11	Private
940	1	1	1	UK	0	5	33	1	0	30	1	1	1	0	6	1	0	1	1	0	999999999	11	Private
941	1	1	1	UK	0	34	58	0	0	80	0	1	0	0	1	5	0	1	3	0	999999999	11	Private
942	1	1	1	UK	0	3	26	0	2	30	1	0	1	0	0	2	0	1	1	0	999999999	11	Private
943	1	1	1	UK	1	13	36	1	0	135	1	0	0	1	0	2	0	0	2	0	999999999	11	Private
944	1	1	1	UK	1	5	27	0	0	25	1	1	0	1	0	4	0	1	1	Publications, literature or journals	6	11	Private
945	1	1	1	UK	1	13	34	1	0	35	1	0	0	0	1	9	0	0	2	0	999999999	11	Private
946	1	1	1	UK	0	25	47	1	1	30	1	1	0	0	4	8	0	0	3	0	999999999	11	Private
947	1	1	1	UK	1	41	64	1	0	30	0	1	0	2	0	4	0	1	3	CPD, Conferences, meetings, seminars or lectures	2	11	Private
949	1	1	1	UK	1	5	29	0	2	30	1	0	0	0	5	6	0	1	1	0	999999999	11	Private
950	1	1	1	UK	1	28	50	0	2	35	1	0	0	0	5	7	0	1	3	Publications, literature or journals	6	11	Private
951	1	1	1	UK	1	10	33	0	0	35	0	0	1	0	1	3	0	1	2	0	999999999	11	Private
952	1	1	1	UK	0	29	54	1	2	40	1	1	1	9	4	0	0	1	3	Publications, literature or journals	6	11	Private
953	1	1	1	UK	0	13	35	1	1	40	1	1	0	0	4	6	0	1	2	Publications, literature or journals	6	11	Private
954	1	1	1	UK	0	23	46	0	0	50	1	1	0	1	0	4	0	1	3	CPD, Conferences, meetings, seminars or lectures	2	11	Private
955	1	1	1	UK	1	6	28	0	1	40	1	1	0	0	9	4	0	1	1	University or Vet School	7	11	Private
956	1	1	1	UK	0	28	51	1	0	35	1	0	0	6	7	0	0	1	3	0	999999999	11	Private
957	1	1	1	UK	1	4	27	0	0	60	1	1	0	0	1	2	0	1	1	University or Vet School	7	11	Private
958	0	1	1	UK	1	38	59	1	0	999999999	1	1	0	0	1	7	0	1	3	Publications, literature or journals	6	11	Path
959	1	1	1	UK	1	9	32	0	0	30	1	0	0	1	0	5	0	1	2	University or Vet School	7	11	Private
960	1	1	1	UK	0	9	30	1	2	30	1	0	0	0	1	9	0	0	2	0	999999999	11	Private
961	1	1	1	UK	1	6	30	0	0	40	1	1	0	0	4	6	0	1	1	PG or specialist study or personal research	4	11	Private
962	0	1	1	UK	0	58	79	1	1	10	0	1	0	2	4	1	0	1	3	Colleague or friend	5	11	Charity
963	1	1	1	UK	0	14	41	1	0	50	1	1	0	0	9	1	0	1	2	University or Vet School	7	11	Private
964	1	1	1	UK	0	19	41	0	1	40	1	0	0	0	1	5	0	1	2	Another discipline e.g. human medicine or science	1	11	Private
965	1	1	1	UK	1	29	50	1	999999999	35	0	1	0	0	6	3	0	1	3	Colleague or friend	5	11	Private
966	1	1	1	UK	1	3	25	0	0	30	1	1	0	0	4	2	0	1	1	University or Vet School	7	11	Private
967	1	1	1	UK	1	8	31	0	0	35	1	0	0	0	2	4	0	1	2	Publications, literature or journals	6	11	Private
968	1	1	1	UK	1	14	37	0	0	10	1	0	0	0	1	9	0	1	2	0	999999999	11	Private
969	1	1	1	UK	0	8	30	0	0	60	1	1	0	0	1	10	0	1	2	PG or specialist study or personal research	4	11	Private
971	1	1	1	UK	0	23	47	0	0	40	1	0	0	0	9	1	0	1	3	CPD, Conferences, meetings, seminars or lectures	2	11	Private
972	1	1	1	UK	0	18	42	0	0	40	1	0	0	0	1	4	0	1	2	CPD, Conferences, meetings, seminars or lectures	2	11	Private
973	1	1	1	UK	1	14	36	0	0	35	1	1	0	1	0	3	0	1	2	Publications, literature or journals	6	11	Private
974	1	1	1	UK	0	30	53	0	0	40	1	0	0	0	1	7	0	1	3	0	999999999	11	Private
975	1	1	1	UK	1	2	25	0	0	50	1	0	0	2	8	0	0	1	1	0	999999999	11	Private
976	1	1	1	UK	1	34	56	0	0	50	1	0	0	0	9	1	0	1	3	Publications, literature or journals	6	11	Private
977	1	1	1	UK	0	25	47	0	0	40	1	0	0	0	9	4	0	1	3	0	999999999	11	Private
978	1	1	1	UK	1	6	30	1	1	50	0	1	0	0	7	5	0	0	1	0	999999999	11	Private
979	1	1	1	UK	1	2	24	0	0	25	1	1	0	0	1	2	0	1	1	University or Vet School	7	11	Private
980	1	1	1	UK	1	1	23	0	1	999999999	1	1	0	0	9	4	0	1	1	0	999999999	11	Private
981	1	1	1	UK	0	35	55	1	0	126	1	0	1	0	1	3	0	1	3	Publications, literature or journals	6	11	Private
982	1	1	1	UK	1	6	31	1	0	999999999	1	0	0	0	7	4	0	1	1	University or Vet School	7	11	Private
983	1	1	1	UK	0	25	48	0	2	40	1	1	1	1	0	4	0	1	3	University or Vet School	7	11	Private
984	1	1	1	UK	0	5	30	1	1	40	1	1	0	0	4	1	0	1	1	University or Vet School	7	11	Private
985	1	1	1	UK	1	12	33	0	0	90	1	0	0	0	6	4	0	1	2	Publications, literature or journals	6	11	Private
986	0	1	1	UK	1	3	26	0	0	60	1	0	0	0	1	999999999	0	0	1	0	999999999	11	GovPublic
987	1	1	1	UK	1	6	28	0	0	30	1	1	0	0	1	4	0	1	1	Ubiquitous or various and multiple sources	1	11	Private
988	1	1	1	UK	0	8	30	1	0	35	1	1	0	0	4	6	0	1	2	0	999999999	11	Private
989	1	1	1	UK	0	11	33	1	0	40	1	0	0	0	1	999999999	0	1	2	PG or specialist study or personal research	4	11	Private
990	1	1	1	UK	0	43	66	1	0	120	1	0	0	0	1	4	0	1	3	University or Vet School	7	11	Private
991	1	1	1	UK	1	9	32	1	0	20	1	1	0	0	9	6	0	1	2	0	999999999	11	Private
992	1	1	1	UK	0	2	25	1	0	40	1	1	0	1	0	4	0	1	1	0	999999999	11	Private
994	1	1	1	UK	1	26	52	1	0	35	1	0	0	5	0	9	0	1	3	Publications, literature or journals	6	11	Private
996	0	1	1	UK	0	25	49	1	0	50	1	0	0	4	0	1	0	1	3	Specialist organisation, research centre or referral clinic	5	11	Gov
997	0	1	1	UK	0	24	46	1	1	40	1	1	0	0	1	4	0	1	3	Publications, literature or journals	6	11	Gov
998	1	1	1	UK	1	3	28	1	2	35	1	1	1	9	0	5	0	1	1	University or Vet School	7	11	Private
999	1	1	1	UK	1	11	34	1	1	60	1	0	0	0	1	4	0	1	2	CPD, Conferences, meetings, seminars or lectures	2	11	Gov
1000	1	1	1	UK	1	9	31	1	0	40	1	1	0	9	1	0	0	1	2	Ubiquitous or various and multiple sources	1	11	Private
1001	1	1	1	UK	1	12	38	1	0	40	1	0	0	0	8	9	0	1	2	University or Vet School	7	11	Private
1002	1	1	1	UK	0	21	43	0	0	110	1	1	0	5	0	9	0	1	2	Publications, literature or journals	6	11	Private
1003	1	1	1	UK	0	30	52	1	0	50	1	0	0	1	7	4	0	1	3	0	999999999	11	Private
1004	1	1	1	UK	1	4	28	1	1	40	1	1	0	0	2	1	0	1	1	University or Vet School	7	11	Private
1005	0	1	1	UK	0	6	30	0	0	25	1	0	0	0	5	2	0	1	1	University or Vet School	7	11	Public
1006	1	1	1	UK	1	12	38	1	2	50	1	0	0	1	9	1	0	1	2	CPD, Conferences, meetings, seminars or lectures	2	11	Charity
1007	1	1	1	UK	1	10	32	0	0	30	1	0	0	0	4	1	0	0	2	0	999999999	11	Private
1008	0	1	1	UK	1	6	30	1	0	60	1	1	0	0	2	3	0	0	1	0	999999999	11	Research
1009	1	1	1	UK	1	3	25	0	0	999999999	1	0	0	0	9	1	0	1	1	0	999999999	11	Private
1010	1	1	1	UK	0	18	42	1	0	70	1	1	1	0	2	4	0	1	2	Publications, literature or journals	6	11	Charity
1011	1	1	1	UK	1	2	25	0	2	30	1	0	0	0	6	5	0	1	1	0	999999999	11	Private
1012	1	1	1	UK	1	9	32	0	2	50	1	0	0	0	2	9	0	1	2	University or Vet School	7	11	Private
1013	1	1	1	UK	0	26	48	0	2	35	0	1	0	2	5	7	0	1	3	0	999999999	11	Private
1015	1	1	1	UK	1	3	25	0	0	35	1	0	0	0	1	5	0	1	1	University or Vet School	7	11	Private
1016	1	1	1	UK	999999999	7	29	0	0	40	1	0	0	2	3	1	0	1	1	0	999999999	11	Private
1017	1	1	1	UK	0	2	24	0	0	50	1	1	0	0	1	4	0	1	1	0	999999999	11	Private
1018	1	1	1	UK	1	13	35	0	0	35	1	1	0	0	9	7	0	1	2	Publications, literature or journals	6	11	Private
1019	1	1	1	UK	0	28	49	0	1	50	1	0	0	0	5	1	0	1	3	Publications, literature or journals	6	11	Private
1020	1	1	1	UK	1	4	27	1	2	40	1	0	0	0	1	6	0	1	1	0	999999999	11	Private
1021	1	1	1	UK	1	22	44	1	0	35	1	1	0	0	2	9	0	1	3	Colleague or friend	5	11	PrivateOther
1022	1	1	1	UK	0	39	62	1	0	999999999	0	0	0	999999999	999999999	999999999	0	1	3	Veterinary Association	5	11	Private
1023	1	1	1	UK	0	7	31	1	0	40	1	0	0	0	2	8	0	1	1	Don't know	1	11	Private
1024	1	1	1	UK	0	4	29	0	0	45	1	1	0	2	1	0	0	1	1	University or Vet School	7	11	Private
1025	1	1	1	UK	1	13	39	1	0	999999999	1	1	0	0	2	1	0	1	2	Publications, literature or journals	6	11	Private
1026	1	1	1	UK	0	53	76	0	0	15	0	0	0	2	5	6	0	0	3	0	999999999	11	Private
1027	1	1	1	UK	1	8	32	1	2	30	1	0	0	2	9	0	0	0	2	0	999999999	11	Private
1028	1	1	1	UK	1	13	35	0	0	35	1	1	0	0	4	8	0	1	2	Publications, literature or journals	6	11	Private
1029	1	1	1	UK	1	30	51	1	2	40	1	0	0	0	3	4	0	1	3	RCVS standards or practice audit	5	11	Private
1030	1	1	1	UK	1	8	32	0	1	40	1	0	0	1	0	9	0	1	2	University or Vet School	7	11	Private
1031	1	1	1	UK	1	3	25	0	2	20	1	0	0	0	4	1	0	1	1	University or Vet School	7	11	Private
1032	1	1	1	UK	1	16	39	0	2	45	1	1	0	0	9	5	0	1	2	CPD, Conferences, meetings, seminars or lectures	2	11	Private
1033	1	1	1	UK	1	7	29	0	0	40	1	0	0	0	1	2	0	1	1	0	999999999	11	Private
1034	0	1	1	UK	0	5	29	0	0	40	1	1	0	0	6	2	0	0	1	0	999999999	11	Private
1035	1	1	1	UK	1	26	48	1	0	200	1	1	0	0	1	2	0	1	3	Publications, literature or journals	6	11	Private
1036	1	1	1	UK	1	4	31	0	0	50	1	0	0	1	0	2	0	1	1	University or Vet School	7	11	Private
1037	1	1	1	UK	0	14	39	1	0	60	1	1	0	0	1	2	0	1	2	CPD, Conferences, meetings, seminars or lectures	2	11	Private
1039	1	1	1	UK	0	15	37	0	0	30	1	0	0	0	1	4	0	1	2	Publications, literature or journals	6	11	Private
1040	1	1	1	UK	0	33	55	0	0	100	1	0	0	0	2	3	0	1	3	CPD, Conferences, meetings, seminars or lectures	2	11	Private
1041	1	1	1	UK	0	20	41	1	0	50	1	1	0	1	4	7	0	1	2	0	999999999	11	Private
1042	1	1	1	UK	1	9	32	0	0	999999999	1	1	0	0	2	1	0	1	2	Veterinary Association	5	11	Private
1043	1	1	1	UK	0	22	46	0	0	40	1	0	1	0	1	9	0	1	3	Publications, literature or journals	6	11	Private
1044	1	1	1	UK	0	27	49	0	1	50	1	1	0	3	5	6	0	1	3	0	999999999	11	Charity
1045	1	1	1	UK	1	10	32	1	0	40	0	1	0	2	1	6	0	0	2	0	999999999	11	Private
1046	1	1	1	UK	1	5	28	0	1	40	1	1	0	0	1	2	0	1	1	0	999999999	11	Charity
1047	1	1	1	UK	1	8	29	0	0	50	1	1	0	2	0	3	0	1	2	PG or specialist study or personal research	4	11	Private
1048	0	1	1	UK	0	40	63	0	1	30	0	1	0	1	5	7	0	0	3	0	999999999	11	GovPublic
1049	1	1	1	UK	0	3	25	0	1	30	1	1	0	9	0	8	0	0	1	0	999999999	11	Private
1051	1	1	1	UK	0	35	58	0	0	40	1	0	0	0	5	8	0	1	3	Publications, literature or journals	6	11	Private
1052	1	1	1	UK	0	7	29	0	0	50	1	0	0	0	1	4	0	1	1	University or Vet School	7	11	Private
1053	1	1	1	UK	0	30	50	0	0	36	1	0	0	0	1	999999999	0	0	3	0	999999999	11	Private
1054	1	1	1	UK	0	32	55	0	0	30	1	1	0	0	4	1	0	1	3	Publications, literature or journals	6	11	Private
1055	1	1	1	UK	1	8	35	0	0	40	1	0	0	0	1	9	0	1	2	University or Vet School	7	11	Private
1056	1	1	1	UK	1	9	32	0	0	35	1	0	0	0	4	1	0	1	2	Publications, literature or journals	6	11	Private
1057	1	1	1	UK	1	24	46	0	2	40	1	1	0	1	0	2	0	0	3	0	999999999	11	Private
1058	1	1	1	UK	1	7	28	0	2	36	1	1	1	1	3	5	0	1	1	University or Vet School	7	11	Private
1059	1	1	1	UK	0	27	49	0	0	40	1	0	1	0	4	9	0	1	3	Veterinary Association	5	11	Private
1060	0	1	1	UK	0	9	33	0	0	24	1	0	0	0	2	999999999	0	1	2	0	999999999	11	GovPublic
1061	1	1	1	UK	1	27	50	1	999999999	35	1	0	0	3	9	0	0	1	3	University or Vet School	7	11	Private
1062	1	1	1	UK	0	41	63	0	0	50	0	1	0	1	4	7	0	1	3	Emails, E-list, Electronic forums, networks or internet	3	11	Private
1063	1	1	1	UK	0	38	62	1	2	30	0	1	0	1	4	6	0	1	3	Publications, literature or journals	6	11	Private
1064	1	1	1	UK	1	20	43	1	1	40	1	1	1	0	4	6	0	1	2	Ubiquitous or various and multiple sources	1	11	Private
1065	0	1	1	UK	0	44	66	1	1	30	1	1	0	1	0	6	0	1	3	Work place or I teach it	4	11	Gov
1066	1	1	1	UK	0	22	45	0	0	80	1	0	0	0	9	4	0	1	3	Veterinary Association	5	11	Private
1067	1	1	1	UK	0	22	44	1	0	35	1	0	0	0	3	1	0	1	3	University or Vet School	7	11	Private
1068	0	1	1	UK	0	15	38	0	0	999999999	0	0	0	999999999	999999999	999999999	0	0	2	0	999999999	11	Industry
1069	1	1	1	UK	0	33	55	0	0	40	1	0	0	0	4	6	0	1	3	0	999999999	11	Private
1070	1	1	1	UK	1	24	47	0	999999999	40	1	0	0	2	0	5	0	0	3	0	999999999	11	Private
1071	1	1	1	UK	0	25	48	0	0	40	0	1	0	1	4	6	0	1	3	Publications, literature or journals	6	11	Private
1072	1	1	1	UK	1	23	46	1	0	50	1	1	0	1	4	0	0	1	3	Publications, literature or journals	6	11	PrivateIndustry
1073	1	1	1	UK	0	8	30	1	0	60	1	0	0	0	2	4	0	1	2	0	999999999	11	Private
1074	1	1	1	UK	0	38	60	1	0	35	1	0	0	0	4	2	0	1	3	Publications, literature or journals	6	11	Private
1076	1	1	1	UK	1	8	35	1	2	50	1	1	0	0	2	1	0	1	2	Publications, literature or journals	6	11	Private
1078	1	1	1	UK	1	18	40	1	2	35	1	1	0	0	1	9	0	1	2	PG or specialist study or personal research	4	11	Private
1079	1	1	1	UK	1	2	26	0	999999999	50	1	1	0	0	1	2	0	1	1	0	999999999	11	Private
1080	1	1	1	UK	1	13	37	1	0	35	1	0	0	0	9	2	0	1	2	0	999999999	11	Private
1081	0	1	1	UK	0	18	40	0	0	100	1	0	0	1	0	4	0	1	2	Publications, literature or journals	6	11	Public
1082	1	1	1	UK	1	24	46	0	1	60	1	0	0	0	4	1	0	1	3	Don't know	1	11	Private
1083	1	1	1	UK	0	40	63	1	0	50	1	0	0	4	1	5	0	1	3	Publications, literature or journals	6	11	Private
1084	1	1	1	UK	1	1	23	0	0	999999999	1	0	0	0	1	2	0	1	1	University or Vet School	7	11	Private
1085	1	1	1	UK	1	31	53	0	0	999999999	1	0	0	0	9	5	0	1	3	Publications, literature or journals	6	11	PrivateOther
1086	1	1	1	UK	1	11	34	1	0	50	1	1	0	0	2	1	0	1	2	0	999999999	11	Private
1087	1	1	1	UK	0	2	35	0	0	30	1	1	0	0	1	2	0	0	1	0	999999999	11	Private
1088	1	1	1	UK	1	8	31	0	2	35	1	1	0	0	5	3	0	1	2	University or Vet School	7	11	Private
1089	1	1	1	UK	1	5	28	0	1	50	1	1	0	0	9	2	0	1	1	University or Vet School	7	11	Private
1090	1	1	1	UK	1	8	30	0	2	30	1	0	0	0	2	1	0	1	2	0	999999999	11	Private
1091	0	1	1	UK	1	23	46	1	0	20	0	1	1	0	2	3	0	1	3	Publications, literature or journals	6	11	Uni
1092	0	1	1	UK	0	43	64	0	1	10	0	1	0	0	1	999999999	0	1	3	Publications, literature or journals	6	11	Other
1093	0	1	1	UK	0	51	74	0	0	999999999	1	1	0	4	0	7	0	1	3	Another discipline e.g. human medicine or science	1	11	Industry
1095	1	1	1	UK	1	5	28	0	1	40	1	1	0	6	0	9	0	1	1	0	999999999	11	Private
1096	1	1	1	UK	1	24	46	0	0	35	1	1	0	1	5	6	0	1	3	CPD, Conferences, meetings, seminars or lectures	2	11	Private
1097	1	1	1	UK	1	5	29	1	0	80	1	0	0	0	1	6	0	1	1	0	999999999	11	PrivateUni
1098	1	1	1	UK	1	13	46	0	0	20	0	1	0	0	6	1	0	0	2	0	999999999	11	Other
1099	1	1	1	UK	1	30	53	0	1	90	1	0	0	0	1	2	0	1	3	Ubiquitous or various and multiple sources	1	11	Private
1100	0	1	1	UK	0	21	44	0	2	999999999	0	0	0	999999999	999999999	999999999	0	0	2	0	999999999	11	Other
1101	1	1	1	UK	1	4	28	1	2	999999999	1	1	0	0	1	9	0	0	1	0	999999999	11	Private
1102	1	1	1	UK	1	38	60	0	2	40	1	0	0	0	4	5	0	1	3	Publications, literature or journals	6	11	Private
1103	1	1	1	UK	1	29	53	1	0	35	1	0	0	0	9	8	0	0	3	0	999999999	11	Private
1104	1	1	1	UK	0	6	30	0	2	40	1	0	0	1	0	2	0	1	1	CPD, Conferences, meetings, seminars or lectures	2	11	Private
1105	1	1	1	UK	1	4	29	1	0	10	0	1	0	5	2	0	0	1	1	0	999999999	11	Private
1106	1	1	1	UK	1	12	34	1	0	50	1	0	0	0	2	9	0	1	2	CPD, Conferences, meetings, seminars or lectures	2	11	Private
1107	1	1	1	UK	1	2	25	0	2	40	1	0	0	0	1	3	0	1	1	0	999999999	11	Private
1108	1	1	1	UK	1	24	47	0	0	36	1	1	0	0	2	9	0	1	3	0	999999999	11	Private
1109	1	1	1	UK	0	52	74	0	0	20	0	0	0	1	4	6	0	0	3	0	999999999	11	Other
1110	1	1	1	UK	1	13	41	1	0	24	1	0	0	0	2	7	0	1	2	CPD, Conferences, meetings, seminars or lectures	2	11	Private
1111	1	1	1	UK	1	7	34	1	0	45	1	1	1	0	1	2	0	1	1	University or Vet School	7	11	Private
1112	1	1	1	UK	1	35	56	0	2	50	0	1	0	3	5	2	0	1	3	Publications, literature or journals	6	11	Private
1113	1	1	1	UK	0	3	27	0	0	120	1	0	0	1	0	2	0	1	1	University or Vet School	7	11	Private
1114	1	1	1	UK	1	4	27	0	2	60	1	1	0	0	5	2	0	1	1	0	999999999	11	Private
1115	1	1	1	UK	0	32	59	1	0	50	1	1	0	0	1	4	0	1	3	Blank or invalid answer	1	11	Private
1116	0	1	1	UK	0	7	30	0	0	20	1	0	0	0	2	3	0	0	1	0	999999999	11	Public
1117	1	1	1	UK	1	9	32	1	2	20	1	1	0	0	5	7	0	1	2	Don't know	1	11	Private
1118	1	1	1	UK	1	15	37	0	0	40	1	1	1	1	9	6	0	1	2	0	999999999	11	Private
1119	1	1	1	UK	1	13	37	0	0	40	0	1	0	2	9	3	0	1	2	0	999999999	11	Private
1120	1	1	1	UK	0	27	49	0	0	35	1	0	0	0	1	3	0	1	3	CPD, Conferences, meetings, seminars or lectures	2	11	Private
1121	0	1	1	UK	1	8	33	1	0	30	1	1	0	0	2	6	0	0	2	0	999999999	11	GovPublic
1122	1	1	1	UK	1	28	49	0	2	35	1	1	0	0	9	2	0	1	3	Publications, literature or journals	6	11	Private
1123	1	1	1	UK	1	4	29	1	1	35	1	0	0	0	1	2	0	1	1	0	999999999	11	Private
1124	0	1	1	UK	0	30	52	1	1	30	0	1	0	1	4	8	0	1	3	0	999999999	11	Gov
1125	1	1	1	UK	0	30	53	1	0	50	1	1	1	0	9	5	0	1	3	Publications, literature or journals	6	11	Private
1126	1	1	1	UK	0	31	56	0	2	35	1	0	0	0	1	5	0	1	3	Publications, literature or journals	6	11	Private
1127	1	1	1	UK	1	26	51	0	0	45	0	1	0	2	5	6	0	0	3	0	999999999	11	Private
1128	1	1	1	UK	1	2	25	0	0	25	1	1	0	0	2	9	0	1	1	0	999999999	11	Private
1129	1	1	1	UK	0	39	65	0	0	30	1	1	0	6	4	9	0	1	3	CPD, Conferences, meetings, seminars or lectures	2	11	Private
1130	1	1	1	UK	1	6	29	0	0	45	1	1	1	0	5	9	0	1	1	University or Vet School	7	11	Private
1131	1	1	1	UK	1	26	49	0	0	105	1	0	0	0	9	6	0	1	3	Publications, literature or journals	6	11	Private
1132	999999999	1	1	UK	999999999	999999999	999999999	999999999	0	30	0	1	0	2	1	4	0	1	999999999	0	999999999	11	#N/A
1133	1	1	1	UK	0	28	50	0	0	35	1	0	0	0	1	5	0	1	3	Publications, literature or journals	6	11	Private
1134	1	1	1	UK	1	2	25	0	2	30	1	1	0	1	0	2	0	0	1	0	999999999	11	Private
1135	1	1	1	UK	0	19	34	0	0	30	1	1	0	0	1	6	0	1	2	Veterinary Association	5	11	Private
1136	1	1	1	UK	1	3	27	0	0	35	0	1	0	2	5	0	0	1	1	Publications, literature or journals	6	11	PrivateResearch
1137	1	1	1	UK	1	2	24	0	1	50	1	0	0	1	0	2	0	1	1	0	999999999	11	Private
1138	1	1	1	UK	1	6	29	0	1	50	1	1	0	0	6	4	0	1	1	University or Vet School	7	11	Private
1139	1	1	1	UK	1	6	38	0	1	35	1	0	0	1	0	4	0	1	1	University or Vet School	7	11	Private
1140	1	1	1	UK	1	6	32	0	0	60	1	0	0	0	2	9	0	1	1	CPD, Conferences, meetings, seminars or lectures	2	11	Private
1141	1	1	1	UK	1	7	32	0	0	30	1	0	0	0	1	2	0	1	1	CPD, Conferences, meetings, seminars or lectures	2	11	Private
1142	1	1	1	UK	0	18	40	1	0	999999999	1	0	0	0	1	4	0	1	2	CPD, Conferences, meetings, seminars or lectures	2	11	Private
1143	1	1	1	UK	1	2	27	1	0	30	1	1	0	0	1	9	0	1	1	University or Vet School	7	11	Private
1144	1	1	1	UK	1	4	25	1	0	60	1	1	0	0	2	999999999	0	1	1	University or Vet School	7	11	Private
1145	1	1	1	UK	1	30	53	1	0	100	1	1	0	2	3	0	0	1	3	Publications, literature or journals	6	11	Private
1146	1	1	1	UK	1	13	37	1	2	24	1	1	0	0	1	9	0	0	2	0	999999999	11	Private
1148	1	1	1	UK	0	29	51	0	0	50	1	0	0	0	9	5	0	1	3	Publications, literature or journals	6	11	Private
1149	1	1	1	UK	1	6	29	1	0	50	1	0	0	0	4	2	0	1	1	University or Vet School	7	11	Private
1150	1	1	1	UK	0	5	27	0	0	50	1	0	0	1	0	2	0	1	1	0	999999999	11	Private
1151	1	1	1	UK	1	10	32	0	0	70	1	1	0	1	2	0	0	1	2	University or Vet School	7	11	Private
1152	1	1	1	UK	0	8	30	0	0	45	1	1	0	4	0	6	0	1	2	University or Vet School	7	11	PrivateCharity
1153	1	1	1	UK	0	16	40	0	1	50	1	0	0	0	9	6	0	1	2	CPD, Conferences, meetings, seminars or lectures	2	11	Private
1154	0	1	1	UK	1	25	49	1	0	750	1	1	0	9	0	5	0	1	3	Veterinary Association	5	11	Gov
1155	1	1	1	UK	0	19	42	0	0	45	1	0	0	0	5	6	0	1	2	Another discipline e.g. human medicine or science	1	11	Private
1156	1	1	1	UK	0	25	48	0	0	40	1	1	1	6	0	5	0	1	3	Ubiquitous or various and multiple sources	1	11	Private
1157	1	1	1	UK	1	10	35	1	1	35	1	1	0	0	1	6	0	0	2	0	999999999	11	Private
1158	1	1	1	UK	1	6	29	0	0	35	1	0	0	0	2	3	0	1	1	University or Vet School	7	11	Private
1159	1	1	1	UK	0	13	35	1	0	50	1	1	0	0	5	1	0	1	2	Veterinary Association	5	11	PrivateUniCharity
1160	1	1	1	UK	0	13	35	1	0	50	1	1	0	1	4	9	0	1	2	PG or specialist study or personal research	4	11	Private
1161	1	1	1	UK	1	20	42	0	0	40	1	1	1	0	1	4	0	1	2	CPD, Conferences, meetings, seminars or lectures	2	11	Private
1162	1	1	1	UK	1	15	45	0	999999999	999999999	1	0	0	0	1	2	0	1	2	0	999999999	11	Private
1163	1	1	1	UK	1	4	26	0	0	40	1	1	0	9	0	5	0	1	1	0	999999999	11	Private
1164	1	1	1	UK	0	15	38	0	0	80	1	0	0	0	5	6	0	1	2	Publications, literature or journals	6	11	Private
1165	1	1	1	UK	1	15	38	0	0	40	1	0	0	0	9	5	0	1	2	CPD, Conferences, meetings, seminars or lectures	2	11	Private
1166	1	1	1	UK	1	5	27	0	2	30	1	1	0	0	9	2	0	1	1	0	999999999	11	Private
1167	1	1	1	UK	1	18	40	0	0	40	1	0	0	2	0	6	0	1	2	Publications, literature or journals	6	11	Private
1168	1	1	1	UK	1	6	29	0	2	40	1	1	0	1	0	5	0	1	1	University or Vet School	7	11	Private
1169	1	1	1	UK	1	7	30	0	1	30	1	0	0	1	0	5	0	1	1	0	999999999	11	Private
1170	1	1	1	UK	1	3	26	1	0	40	1	0	0	0	4	2	0	1	1	University or Vet School	7	11	Private
1171	1	1	1	UK	1	6	32	0	0	40	1	1	0	0	6	1	0	1	1	University or Vet School	7	11	Private
1173	1	1	1	UK	0	30	52	1	0	50	1	0	0	0	1	6	0	1	3	University or Vet School	7	11	Private
1174	1	1	1	UK	1	14	36	0	0	35	1	0	0	0	3	4	0	1	2	Publications, literature or journals	6	11	Private
1175	1	1	1	UK	1	5	28	0	0	40	1	0	0	2	3	0	0	1	1	0	999999999	11	Private
1176	1	1	1	UK	1	16	38	0	0	20	0	1	0	0	1	9	0	1	2	CPD, Conferences, meetings, seminars or lectures	2	11	Private
1177	0	1	1	UK	1	21	41	0	1	30	1	0	0	2	4	0	0	0	2	0	999999999	11	Industry
1178	0	1	1	UK	0	29	54	0	0	100	0	1	1	0	2	2	0	0	3	0	999999999	11	Public
1179	1	1	1	UK	0	31	53	0	1	45	1	1	0	1	0	4	0	1	3	CPD, Conferences, meetings, seminars or lectures	2	11	Private
1180	1	1	1	UK	0	2	26	0	2	30	1	0	0	0	2	6	0	0	1	0	999999999	11	Private
1181	1	1	1	UK	0	17	39	0	0	35	1	1	0	5	0	1	0	1	2	Publications, literature or journals	6	11	Private
1182	1	1	1	UK	1	7	31	1	0	35	1	1	0	0	7	4	0	1	1	0	999999999	11	Private
1183	0	1	1	UK	0	8	33	1	0	40	1	0	0	0	9	2	0	0	2	0	999999999	11	Public
1184	1	1	1	UK	0	23	46	0	0	40	1	0	0	0	8	2	0	1	3	Veterinary Association	5	11	Private
1185	1	1	1	UK	1	22	45	1	0	35	0	1	0	3	0	5	0	1	3	Publications, literature or journals	6	11	Private
1186	1	1	1	UK	1	7	34	0	0	20	1	0	0	1	2	0	0	1	1	University or Vet School	7	11	Private
1187	1	1	1	UK	0	40	62	0	999999999	20	1	0	0	8	5	1	0	1	3	CPD, Conferences, meetings, seminars or lectures	2	11	Private
1188	1	1	1	UK	0	19	43	0	0	40	1	0	0	0	5	2	0	1	2	University or Vet School	7	11	Charity
1189	1	1	1	UK	1	28	51	0	0	40	1	0	0	0	5	7	0	0	3	0	999999999	11	Private
1190	1	1	1	UK	1	14	37	0	2	40	1	0	0	0	4	1	0	1	2	Publications, literature or journals	6	11	Private
1191	1	1	1	UK	1	20	44	1	0	35	1	1	0	0	9	2	0	1	2	0	999999999	11	UniCharity
1192	1	1	1	UK	0	27	49	1	2	80	1	1	0	0	9	1	0	1	3	0	999999999	11	PrivateResearchOther
1193	1	1	1	UK	0	39	61	1	1	35	0	1	0	2	0	3	0	1	3	Publications, literature or journals	6	11	PrivateOutside
1194	1	1	1	UK	1	2	26	0	0	20	1	0	0	0	1	5	0	1	1	0	999999999	11	Army
1195	1	1	1	UK	0	33	55	0	0	40	1	1	1	0	1	2	0	1	3	Publications, literature or journals	6	11	Private
1196	1	1	1	UK	1	29	51	0	0	36	1	0	0	0	3	2	0	1	3	RCVS standards or practice audit	5	11	Private
1197	1	1	1	UK	0	25	48	0	2	35	1	0	0	0	6	5	0	1	3	0	999999999	11	Private
1198	1	1	1	UK	1	27	49	1	0	70	1	1	0	1	4	0	0	1	3	CPD, Conferences, meetings, seminars or lectures	2	11	PrivateUni
1199	1	1	1	UK	1	2	24	0	2	35	1	0	0	0	9	1	0	1	1	0	999999999	11	Private
1201	1	1	1	UK	0	35	57	0	0	35	0	1	0	8	0	7	0	1	3	Publications, literature or journals	6	11	Private
1202	1	1	1	UK	1	6	30	0	2	32	1	0	0	0	1	8	0	1	1	0	999999999	11	Private
1203	1	1	1	UK	1	15	37	1	0	50	1	1	0	0	2	3	0	1	2	CPD, Conferences, meetings, seminars or lectures	2	11	Private
1204	1	1	1	UK	1	5	28	0	0	35	1	0	0	1	0	5	0	1	1	0	999999999	11	Private
1205	1	1	1	UK	0	7	42	1	2	40	1	0	0	0	2	9	0	1	1	University or Vet School	7	11	Private
1206	1	1	1	UK	1	6	29	0	0	40	1	0	0	1	0	9	0	1	1	University or Vet School	7	11	Private
1207	1	1	1	UK	1	14	39	0	0	20	0	1	0	0	2	5	0	1	2	CPD, Conferences, meetings, seminars or lectures	2	11	Private
1208	1	1	1	UK	1	33	56	1	0	50	1	0	0	0	1	4	0	1	3	Publications, literature or journals	6	11	Private
1209	1	1	1	UK	1	22	45	1	0	45	0	1	0	10	1	4	0	1	3	CPD, Conferences, meetings, seminars or lectures	2	11	Private
1210	1	1	1	UK	0	12	36	0	0	40	1	0	0	0	2	5	0	1	2	CPD, Conferences, meetings, seminars or lectures	2	11	Private
1211	1	1	1	UK	0	10	33	0	1	45	1	1	0	0	1	6	0	1	2	Publications, literature or journals	6	11	Private
1212	0	1	1	UK	1	9	33	1	0	300	1	1	0	0	2	6	0	0	2	0	999999999	11	GovPublic
1213	1	1	1	UK	1	12	35	1	0	55	1	1	0	0	2	3	0	1	2	PG or specialist study or personal research	4	11	Private
1214	0	1	1	UK	0	7	30	1	0	200	1	0	0	9	7	0	0	0	1	0	999999999	11	Public
1215	1	1	1	UK	1	7	30	1	0	100	1	0	0	0	1	9	0	1	1	PG or specialist study or personal research	4	11	Private
1216	1	1	1	UK	1	21	44	1	0	20	1	0	0	0	8	4	0	1	2	CPD, Conferences, meetings, seminars or lectures	2	11	Private
1217	1	1	1	UK	1	14	37	1	0	50	1	1	0	0	1	4	0	1	2	University or Vet School	7	11	PrivateUni
1218	1	1	1	UK	1	8	34	0	0	60	1	0	0	0	1	6	0	1	2	CPD, Conferences, meetings, seminars or lectures	2	11	Private
1219	1	1	1	UK	1	11	33	0	0	12	1	0	0	0	2	8	0	1	2	Veterinary Association	5	11	Private
1220	1	1	1	UK	0	19	43	1	0	100	1	0	0	0	4	8	0	1	2	Specialist organisation, research centre or referral clinic	5	11	PrivateUni
1221	1	1	1	UK	0	20	43	1	0	45	1	1	0	0	1	6	0	1	2	Don't know	1	11	Private
1222	1	1	1	UK	0	29	51	0	0	30	1	0	0	1	9	3	0	1	3	University or Vet School	7	11	Private
1223	1	1	1	UK	0	14	37	1	0	40	1	0	0	1	0	4	0	1	2	Ubiquitous or various and multiple sources	1	11	Private
1224	1	1	1	UK	1	3	26	0	0	40	1	1	0	1	8	0	0	1	1	University or Vet School	7	11	Private
1225	0	1	1	UK	0	39	62	0	1	44	1	0	0	1	5	0	0	1	3	Work place or I teach it	4	11	Other
1226	0	1	1	UK	1	26	47	1	2	50	1	0	0	0	2	7	0	1	3	University or Vet School	7	11	Gov
1227	1	1	1	UK	1	5	26	0	1	12	1	0	0	3	5	4	0	1	1	0	999999999	11	Private
1228	1	1	1	UK	1	3	27	1	2	45	1	1	0	1	2	9	0	1	1	0	999999999	11	Private
1229	1	1	1	UK	1	10	34	1	0	40	1	0	0	0	9	4	0	1	2	University or Vet School	7	11	Private
1230	1	1	1	UK	1	25	46	0	0	45	1	0	0	0	1	4	0	1	3	Publications, literature or journals	6	11	Private
1231	1	1	1	UK	0	8	30	1	0	40	1	0	0	1	0	4	0	1	2	University or Vet School	7	11	Private
1232	1	1	1	UK	0	9	33	1	0	50	1	1	1	0	1	4	0	1	2	University or Vet School	7	11	Private
1233	1	1	1	UK	1	18	41	1	0	35	1	0	0	0	4	9	0	1	2	University or Vet School	7	11	Private
1234	1	1	1	UK	0	17	39	1	0	100	1	1	0	0	1	3	0	1	2	Publications, literature or journals	6	11	Private
1235	1	1	1	UK	0	4	27	0	0	50	1	0	0	0	8	9	0	1	1	Publications, literature or journals	6	11	Private
1236	1	1	1	UK	1	1	23	0	0	999999999	0	0	0	999999999	999999999	999999999	0	1	1	0	999999999	11	Private
1237	1	1	1	UK	1	4	28	1	0	30	1	1	1	0	6	9	0	1	1	0	999999999	11	Private
1238	1	1	1	UK	1	9	32	1	0	80	1	1	0	0	1	9	0	1	2	Work place or I teach it	4	11	PrivateUni
1239	1	1	1	UK	1	33	55	0	0	35	1	0	0	1	3	5	0	1	3	Publications, literature or journals	6	11	Private
1240	1	1	1	UK	1	2	29	1	0	35	1	0	0	0	2	5	0	1	1	University or Vet School	7	11	Private
1241	1	1	1	UK	1	3	25	0	2	50	1	1	0	0	1	8	0	1	1	University or Vet School	7	11	Private
1242	1	1	1	UK	1	6	29	0	0	40	1	0	0	0	1	9	0	1	1	University or Vet School	7	11	Private
1243	1	1	1	UK	1	4	26	0	0	24	1	0	0	0	8	6	0	1	1	Work place or I teach it	4	11	Private
1245	1	1	1	UK	0	11	33	0	0	40	1	0	0	0	1	4	0	1	2	CPD, Conferences, meetings, seminars or lectures	2	11	Private
1246	1	1	1	UK	0	25	47	0	2	60	1	0	0	0	9	5	0	1	3	Work place or I teach it	4	11	Private
1247	1	1	1	UK	0	13	36	0	0	40	1	0	0	5	4	3	0	1	2	Publications, literature or journals	6	11	Private
1248	1	1	1	UK	1	10	34	1	2	30	1	0	0	0	1	9	0	1	2	PG or specialist study or personal research	4	11	Private
1249	1	1	1	UK	0	15	38	1	0	40	1	0	0	2	4	6	0	1	2	0	999999999	11	Private
1250	1	1	1	UK	1	20	43	1	0	45	1	0	0	7	0	5	0	1	2	University or Vet School	7	11	Private
1251	1	1	1	UK	1	4	27	1	0	50	1	1	1	2	0	9	0	1	1	University or Vet School	7	11	Private
1252	1	1	1	UK	1	999999999	999999999	0	0	40	1	0	0	9	0	2	0	1	999999999	Specialist organisation, research centre or referral clinic	5	11	Private
1253	1	1	1	UK	1	6	29	0	0	85	1	1	1	0	4	3	0	1	1	0	999999999	11	Private
1254	1	1	1	UK	1	7	30	1	2	30	1	0	0	0	1	5	0	0	1	0	999999999	11	Private
1255	1	1	1	UK	0	23	46	0	0	37	1	0	0	1	0	4	0	1	3	Publications, literature or journals	6	11	Private
1256	1	1	1	UK	1	32	55	0	0	40	0	1	0	0	5	7	0	1	3	Publications, literature or journals	6	11	PrivateOther
1257	0	1	1	UK	1	4	30	0	0	50	1	0	0	0	2	1	0	0	1	0	999999999	11	Other
1258	1	1	1	UK	0	43	64	0	1	50	1	0	0	5	0	7	0	1	3	Publications, literature or journals	6	11	Private
1259	1	1	1	UK	1	2	26	0	0	25	1	0	0	9	0	1	0	1	1	University or Vet School	7	11	PrivateUni
1260	1	1	1	UK	0	17	39	0	0	100	1	1	0	5	9	0	0	1	2	0	999999999	11	Private
1261	1	1	1	UK	1	4	30	1	2	45	1	1	1	0	1	4	0	1	1	University or Vet School	7	11	Private
1262	1	1	1	UK	1	10	33	0	0	999999999	1	1	1	2	9	4	0	1	2	PG or specialist study or personal research	4	11	Private
1263	1	1	1	UK	1	7	32	0	0	100	1	1	0	0	1	9	0	1	1	PG or specialist study or personal research	4	11	Charity
1265	1	1	1	UK	1	3	25	0	1	46	1	0	0	0	6	8	0	1	1	0	999999999	11	Private
1266	1	1	1	UK	1	14	36	0	2	20	1	0	0	0	9	2	0	0	2	0	999999999	11	Charity
1267	1	1	1	UK	1	25	48	1	0	180	1	1	0	9	1	2	0	1	3	Publications, literature or journals	6	11	Private
1268	1	1	1	UK	0	39	61	0	1	40	1	0	0	1	4	8	0	1	3	Publications, literature or journals	6	11	Private
1269	1	1	1	UK	0	14	36	0	2	30	1	0	0	0	1	2	0	0	2	0	999999999	11	Private
1270	1	1	1	UK	1	3	25	0	0	20	1	0	0	0	2	8	0	1	1	0	999999999	11	Private
1271	1	1	1	UK	0	19	41	0	0	40	1	0	1	1	0	5	0	0	2	0	999999999	11	Private
1272	1	1	1	UK	1	16	38	1	0	40	1	0	0	0	4	9	0	1	2	CPD, Conferences, meetings, seminars or lectures	2	11	Private
1273	1	1	1	UK	0	17	39	0	0	516	1	0	0	3	7	0	0	0	2	0	999999999	11	Public
1274	1	1	1	UK	0	32	53	0	2	50	1	1	0	5	3	0	0	1	3	Publications, literature or journals	6	11	Private
1275	1	1	1	UK	0	25	47	1	0	999999999	1	1	0	0	4	8	0	1	3	0	999999999	11	PrivateUni
1276	1	1	1	UK	0	8	32	1	0	35	1	0	1	9	6	0	0	1	2	Publications, literature or journals	6	11	Private
1277	1	1	1	UK	0	5	30	0	0	50	1	1	0	0	9	4	0	1	1	0	999999999	11	Private
1278	1	1	1	UK	1	4	26	0	0	45	1	0	0	0	1	9	0	1	1	Publications, literature or journals	6	11	Private
1279	1	1	1	UK	0	11	34	0	0	75	1	0	0	1	0	4	0	1	2	Publications, literature or journals	6	11	PrivateResearch
1280	1	1	1	UK	0	36	58	1	0	90	1	0	0	1	4	6	0	1	3	0	999999999	11	Private
1281	1	1	1	UK	1	11	34	0	0	40	1	0	0	0	2	4	0	1	2	CPD, Conferences, meetings, seminars or lectures	2	11	Private
1282	1	1	1	UK	1	15	38	1	0	25	0	1	0	0	9	5	0	1	2	Publications, literature or journals	6	11	Private
1283	1	1	1	UK	1	12	34	1	0	35	0	1	0	4	0	7	0	1	2	Work place or I teach it	4	11	Uni
1285	0	1	1	UK	1	26	48	1	0	90	1	1	0	4	0	9	0	1	3	0	999999999	11	Gov
1286	0	1	1	UK	1	12	35	0	0	35	1	0	0	2	3	0	0	1	2	CPD, Conferences, meetings, seminars or lectures	2	11	Private
1287	0	1	1	UK	1	5	30	0	0	999999999	0	0	0	999999999	999999999	999999999	0	0	1	0	999999999	11	GovOutside
1288	1	1	1	UK	0	34	58	0	2	150	0	1	0	0	1	2	0	1	3	University or Vet School	7	11	PrivateUni
1289	1	1	1	UK	0	35	57	1	0	50	1	1	1	1	4	0	0	1	3	0	999999999	11	Uni
1290	1	1	1	UK	0	24	47	1	999999999	100	1	0	0	0	1	4	0	1	3	0	999999999	11	PrivateUniResearch
1291	1	1	1	UK	1	23	47	1	0	35	0	1	0	0	4	2	0	1	3	University or Vet School	7	11	Uni
1292	0	1	1	UK	0	20	43	1	1	35	1	0	0	4	7	6	0	1	2	0	999999999	11	UniResearch
1293	1	1	1	UK	0	22	44	0	0	60	1	0	0	0	4	1	0	1	3	0	999999999	11	Private
1294	1	1	1	UK	0	16	38	1	1	110	1	1	1	4	1	0	0	1	2	0	999999999	11	UniResearch
1295	1	1	1	UK	0	37	61	0	2	25	1	0	0	0	6	7	0	1	3	Ubiquitous or various and multiple sources	1	11	Private
1296	1	1	1	UK	1	22	42	1	0	40	1	0	0	0	4	6	0	1	3	0	999999999	11	Private
1297	1	1	1	UK	0	5	34	0	0	300	1	0	0	4	10	1	0	1	1	University or Vet School	7	11	Research
1298	1	1	1	UK	1	14	37	0	0	35	1	1	0	9	2	0	0	1	2	CPD, Conferences, meetings, seminars or lectures	2	11	Charity
1299	0	1	1	UK	1	15	37	1	0	50	1	0	0	1	0	4	0	1	2	PG or specialist study or personal research	4	11	Uni
1300	1	1	1	UK	1	15	37	1	0	100	1	1	0	1	0	4	0	1	2	Work place or I teach it	4	11	Uni
1301	1	1	1	UK	0	9	32	1	1	50	1	1	1	1	0	4	0	1	2	Work place or I teach it	4	11	Uni
1302	1	1	1	UK	1	6	29	0	0	50	1	0	0	0	1	6	0	1	1	Work place or I teach it	4	11	Uni
1303	0	1	1	UK	1	10	37	1	0	40	1	1	0	1	4	7	0	1	2	Work place or I teach it	4	11	Uni
1304	1	1	1	UK	1	21	44	0	2	40	1	1	0	3	9	0	0	1	2	Don't know	1	11	Private
1305	1	1	1	UK	0	17	51	1	0	60	1	1	0	1	4	9	0	1	2	Another discipline e.g. human medicine or science	1	11	Uni
1306	1	1	1	UK	1	26	47	1	0	500	1	1	0	1	4	6	0	1	3	University or Vet School	7	11	Uni
1307	1	1	1	UK	0	25	47	1	999999999	140	1	1	0	4	1	6	0	1	3	CPD, Conferences, meetings, seminars or lectures	2	11	Private
1308	1	1	1	UK	0	28	54	1	0	35	1	0	0	2	7	9	0	1	3	CPD, Conferences, meetings, seminars or lectures	2	11	Private
1309	1	1	1	UK	1	17	41	0	0	40	1	0	0	8	3	9	0	1	2	CPD, Conferences, meetings, seminars or lectures	2	11	Private
1310	0	1	1	UK	1	7	29	1	0	100	1	1	0	1	0	4	0	1	1	University or Vet School	7	11	Industry
1311	1	1	1	UK	1	1	24	0	0	999999999	1	0	0	0	1	9	0	1	1	University or Vet School	7	11	Private
1312	1	1	1	UK	1	11	40	1	0	60	1	1	0	0	1	4	0	1	2	Publications, literature or journals	6	11	Private
1313	1	1	1	UK	0	15	38	1	1	80	1	1	0	4	1	6	0	1	2	University or Vet School	7	11	UniResearch
1314	1	1	1	UK	0	49	72	0	1	999999999	0	0	0	999999999	999999999	999999999	0	1	3	Publications, literature or journals	6	11	Private
1315	0	1	1	UK	1	40	62	1	999999999	35	1	0	0	1	2	4	0	1	3	0	999999999	11	Path
1316	1	1	1	UK	1	2	24	0	1	50	1	0	0	0	1	9	0	1	1	University or Vet School	7	11	Private
1317	0	1	1	UK	0	42	64	1	0	999999999	0	0	0	999999999	999999999	999999999	0	1	3	Work place or I teach it	4	11	Other
1318	1	1	1	UK	1	27	51	1	0	100	1	0	0	0	4	6	0	1	3	Publications, literature or journals	6	11	Private
1319	1	1	1	UK	0	3	27	0	0	120	1	1	0	0	1	9	0	1	1	0	999999999	11	Private
1320	1	1	1	UK	1	2	25	0	2	999999999	1	1	0	5	0	4	0	1	1	University or Vet School	7	11	Private
1321	1	1	1	UK	0	30	52	0	0	80	1	0	0	0	9	5	0	1	3	0	999999999	11	Private
1322	1	1	1	UK	1	3	25	0	0	45	1	0	0	2	0	6	0	1	1	Publications, literature or journals	6	11	Private
1323	1	1	1	UK	1	7	30	0	2	40	1	0	0	2	5	9	0	0	1	0	999999999	11	Private
1324	1	1	1	UK	1	27	49	0	2	30	1	1	0	0	0	999999999	0	0	3	0	999999999	11	Private
1325	1	1	1	UK	1	15	39	1	0	40	1	0	0	0	5	4	0	1	2	0	999999999	11	Private
1326	1	1	1	UK	0	26	50	1	1	35	1	0	0	1	9	5	0	1	3	0	999999999	11	Private
1327	1	1	1	UK	1	8	33	1	0	40	1	0	0	0	1	9	0	0	2	0	999999999	11	Private
1328	1	1	1	UK	1	17	38	1	0	50	1	1	0	0	4	9	0	1	2	RCVS standards or practice audit	5	11	Private
1329	1	1	1	UK	1	5	29	1	2	40	1	0	0	0	5	2	0	1	1	0	999999999	11	Private
1330	1	1	1	UK	1	16	39	0	0	35	1	0	0	0	1	2	0	1	2	CPD, Conferences, meetings, seminars or lectures	2	11	Private
1331	1	1	1	UK	1	5	29	0	2	40	1	0	0	0	6	8	0	1	1	0	999999999	11	Private
1332	1	1	1	UK	1	8	32	0	0	50	1	1	1	0	1	9	0	1	2	0	999999999	11	Private
1333	1	1	1	UK	1	11	33	0	0	50	1	0	0	9	1	2	0	1	2	0	999999999	11	Private
1334	0	1	1	UK	0	8	32	1	0	35	1	0	1	1	4	6	0	1	2	University or Vet School	7	11	UniResearch
1335	1	1	1	UK	1	22	44	0	2	40	1	1	0	0	1	4	0	1	3	0	999999999	11	Private
1336	1	1	1	UK	1	10	33	0	2	60	1	0	0	0	1	2	0	1	2	CPD, Conferences, meetings, seminars or lectures	2	11	Private
1337	1	1	1	UK	1	5	28	0	2	40	1	0	0	0	1	8	0	1	1	0	999999999	11	Private
1338	0	1	1	UK	0	7	30	0	0	200	1	0	0	0	4	1	0	1	1	CPD, Conferences, meetings, seminars or lectures	2	11	Industry
1339	1	1	1	UK	1	31	53	1	0	35	1	0	0	0	9	5	0	1	3	0	999999999	11	Private
1340	1	1	1	UK	0	27	49	0	0	35	1	1	0	0	5	2	0	1	3	University or Vet School	7	11	Private
1341	1	1	1	UK	0	45	70	0	0	50	1	1	0	0	3	1	0	1	3	Publications, literature or journals	6	11	Private
1342	1	1	1	UK	1	8	31	0	0	50	1	1	0	9	0	2	0	1	2	Specialist organisation, research centre or referral clinic	5	11	Private
1343	1	1	1	UK	1	9	31	0	1	35	1	0	0	0	5	4	0	1	2	Ubiquitous or various and multiple sources	1	11	Private
1344	1	1	1	UK	1	9	34	0	999999999	40	1	0	0	0	9	8	0	1	2	Publications, literature or journals	6	11	Private
1345	1	1	1	UK	1	3	27	1	0	50	1	0	0	0	9	2	0	1	1	0	999999999	11	Private
1346	1	1	1	UK	0	15	37	0	0	50	1	0	0	1	0	9	0	1	2	CPD, Conferences, meetings, seminars or lectures	2	11	Private
1347	1	1	1	UK	1	2	25	1	0	30	1	1	0	0	9	4	0	1	1	University or Vet School	7	11	PrivateUniBreak
1348	1	1	1	UK	1	7	30	0	0	35	1	0	0	0	1	9	0	1	1	CPD, Conferences, meetings, seminars or lectures	2	11	Private
1349	1	1	1	UK	0	32	54	1	0	35	1	0	0	1	4	6	0	1	3	0	999999999	11	PrivateUni
1350	1	1	1	UK	1	22	44	1	0	35	1	0	0	0	1	2	0	1	3	Colleague or friend	5	11	Private
1351	1	1	1	UK	1	4	27	0	1	25	1	1	0	1	0	4	0	1	1	0	999999999	11	Private
1352	1	1	1	UK	1	13	35	0	0	30	1	0	0	2	4	0	0	1	2	0	999999999	11	Private
1353	1	1	1	UK	1	31	52	0	2	36	1	1	0	0	1	9	0	1	3	CPD, Conferences, meetings, seminars or lectures	2	11	Charity
1354	1	1	1	UK	1	25	47	0	0	35	1	0	0	3	0	5	0	1	3	Veterinary Association	5	11	Private
1355	1	1	1	UK	0	29	53	1	0	50	1	0	0	0	4	9	0	1	3	CPD, Conferences, meetings, seminars or lectures	2	11	Private
1356	1	1	1	UK	0	1	24	0	0	999999999	0	0	0	999999999	999999999	999999999	0	1	1	University or Vet School	7	11	Private
1357	1	1	1	UK	1	10	32	0	2	20	1	0	0	0	1	5	0	1	2	0	999999999	11	Private
1358	1	1	1	UK	1	2	24	0	0	40	0	1	0	0	1	5	0	1	1	0	999999999	11	PrivateGov
1359	1	1	1	UK	0	21	44	1	0	35	1	0	0	1	0	2	0	1	2	CPD, Conferences, meetings, seminars or lectures	2	11	Private
1360	1	1	1	UK	1	24	48	0	2	40	1	0	0	4	1	0	0	1	3	Don't know	1	11	Gov
1361	1	1	1	UK	1	3	25	0	0	60	0	1	0	2	9	0	0	1	1	University or Vet School	7	11	Private
1362	1	1	1	UK	1	1	29	1	0	35	1	1	1	9	0	2	0	1	1	0	999999999	11	Private
1363	1	1	1	UK	0	28	51	0	0	40	1	0	0	0	1	4	0	1	3	Publications, literature or journals	6	11	Private
1364	1	1	1	UK	0	46	67	0	0	20	1	1	0	0	4	2	0	1	3	Colleague or friend	5	11	Private
1365	1	1	1	UK	1	30	52	1	0	200	1	1	1	4	2	1	0	1	3	Another discipline e.g. human medicine or science	1	11	PrivateResearch
1366	1	1	1	UK	1	13	37	0	0	30	0	1	0	2	0	9	0	1	2	0	999999999	11	Private
1367	1	1	1	UK	1	1	23	0	1	60	1	0	0	8	0	9	0	1	1	University or Vet School	7	11	PrivateUni
1368	1	1	1	UK	1	5	28	0	1	35	1	0	0	0	5	9	0	1	1	University or Vet School	7	11	Private
1369	1	1	1	UK	1	9	33	1	0	60	1	0	0	2	0	4	0	1	2	University or Vet School	7	11	Private
1370	1	1	1	UK	1	22	44	1	0	35	1	1	0	9	0	2	0	0	3	0	999999999	11	Private
1371	1	1	1	UK	0	41	64	0	2	50	0	1	0	5	6	999999999	0	0	3	0	999999999	11	Private
1372	1	1	1	UK	1	4	27	0	2	30	1	0	0	9	2	1	0	1	1	University or Vet School	7	11	Private
1373	1	1	1	UK	0	30	52	0	2	35	1	0	0	1	0	4	0	0	3	0	999999999	11	Private
1374	1	1	1	UK	0	11	32	0	2	35	1	0	0	0	2	7	0	1	2	0	999999999	11	Private
1375	0	1	1	UK	0	21	43	1	0	30	1	0	0	0	1	4	0	1	2	Specialist organisation, research centre or referral clinic	5	11	Industry
1376	1	1	1	UK	1	19	41	0	1	50	1	0	0	0	2	4	0	1	2	Publications, literature or journals	6	11	Private
1377	1	1	1	UK	0	32	55	1	0	100	1	0	0	10	1	8	0	1	3	General veterinary or professional knowledge or verbal unknown	5	11	Private
1378	0	1	1	UK	0	15	41	1	0	999999999	0	0	0	999999999	999999999	999999999	0	1	2	Ubiquitous or various and multiple sources	1	11	Research
1379	1	1	1	UK	1	7	29	1	0	30	1	1	0	0	2	1	0	1	1	0	999999999	11	Private
1380	1	1	1	UK	1	8	31	1	1	45	1	1	0	3	2	0	0	1	2	University or Vet School	7	11	Private
1381	1	1	1	UK	0	4	30	1	0	50	1	0	1	0	1	8	0	1	1	University or Vet School	7	11	Private
1382	1	1	1	UK	1	19	42	0	2	40	1	1	0	0	1	3	0	1	2	Publications, literature or journals	6	11	Private
1383	1	1	1	UK	1	8	31	1	0	50	1	0	0	2	9	4	0	1	2	University or Vet School	7	11	Private
1384	1	1	1	UK	1	10	35	1	0	30	1	1	0	0	1	4	0	1	2	CPD, Conferences, meetings, seminars or lectures	2	11	Private
1385	1	1	1	UK	0	37	58	0	0	50	1	1	0	4	0	10	0	1	3	0	999999999	11	Private
1386	1	1	1	UK	1	6	30	0	1	37	1	0	1	0	5	2	0	1	1	0	999999999	11	Private
1387	1	1	1	UK	0	35	58	1	0	60	1	0	1	1	9	4	0	1	3	CPD, Conferences, meetings, seminars or lectures	2	11	PrivateUni
1388	1	1	1	UK	0	31	54	1	2	50	1	0	0	0	4	2	0	1	3	Ubiquitous or various and multiple sources	1	11	Private
1389	1	1	1	UK	1	2	25	0	2	35	1	0	0	0	1	2	0	1	1	University or Vet School	7	11	Private
1390	1	1	1	UK	1	10	32	0	0	35	1	1	0	0	9	3	0	1	2	Publications, literature or journals	6	11	Private
1391	1	1	1	UK	1	33	56	0	0	30	0	1	0	0	1	9	0	1	3	0	999999999	11	Private
1392	1	1	1	UK	0	21	43	0	0	40	1	0	0	0	1	4	0	1	2	Publications, literature or journals	6	11	Private
1393	1	1	1	UK	1	25	50	0	2	35	1	1	0	0	1	4	0	0	3	0	999999999	11	Private
1394	1	1	1	UK	1	9	32	0	2	50	1	1	0	2	0	9	0	1	2	PG or specialist study or personal research	4	11	Charity
1395	0	1	1	UK	0	5	27	0	1	40	1	0	0	1	0	5	0	1	1	0	999999999	11	Industry
1396	0	1	1	UK	1	23	45	0	0	999999999	0	1	0	4	6	1	0	1	3	General veterinary or professional knowledge or verbal unknown	5	11	OutsideOther
1397	1	1	1	UK	0	23	45	1	0	100	1	1	1	10	9	4	0	1	3	Publications, literature or journals	6	11	PrivatePathCharity
1398	1	1	1	UK	0	3	26	0	0	40	1	0	0	0	1	2	0	1	1	University or Vet School	7	11	Private
1399	1	1	1	UK	1	12	34	0	0	20	1	1	0	2	0	3	0	0	2	0	999999999	11	Charity
1400	1	1	1	UK	1	11	33	1	0	40	1	0	0	1	0	4	0	1	2	Colleague or friend	5	11	Private
1401	1	1	1	UK	0	22	45	1	1	100	1	1	1	3	4	1	0	1	3	CPD, Conferences, meetings, seminars or lectures	2	11	Private
1402	1	1	1	UK	1	5	27	0	0	40	0	0	1	0	2	6	0	1	1	0	999999999	11	Private
1403	1	1	1	UK	1	17	40	1	0	100	1	0	0	1	4	8	0	1	2	Ubiquitous or various and multiple sources	1	11	Private
1404	1	1	1	UK	1	26	48	0	1	40	1	0	0	2	0	7	0	1	3	General veterinary or professional knowledge or verbal unknown	5	11	Private
1405	1	1	1	UK	0	40	62	1	1	500	1	1	0	0	1	2	0	1	3	CPD, Conferences, meetings, seminars or lectures	2	11	Private
1406	1	1	1	UK	0	28	50	0	0	40	1	0	0	0	1	4	0	1	3	Publications, literature or journals	6	11	Private
1407	1	1	1	UK	1	5	32	1	0	20	1	0	0	0	4	5	0	1	1	0	999999999	11	Private
1408	1	1	1	UK	1	6	28	0	0	36	1	1	0	1	0	2	0	1	1	0	999999999	11	Private
1409	1	1	1	UK	0	4	27	1	0	40	1	0	0	0	5	8	0	1	1	General veterinary or professional knowledge or verbal unknown	5	11	Private
1410	1	1	1	UK	0	3	31	1	0	50	1	1	0	0	9	4	0	1	1	0	999999999	11	Private
1411	1	1	1	UK	1	22	44	0	0	35	1	0	0	0	3	5	0	1	3	0	999999999	11	Private
1412	1	1	1	UK	1	11	39	0	1	35	0	1	0	2	4	9	0	1	2	University or Vet School	7	11	Private
1413	1	1	1	UK	1	6	29	0	0	40	1	0	0	0	1	4	0	1	1	University or Vet School	7	11	Private
1414	1	1	1	UK	1	38	60	0	0	40	1	1	0	0	5	2	0	1	3	Publications, literature or journals	6	11	Private
1415	1	1	1	UK	1	14	36	0	1	50	1	1	0	0	1	4	0	1	2	Publications, literature or journals	6	11	Private
1416	1	1	1	UK	0	8	30	0	0	35	1	1	0	0	4	2	0	1	2	Publications, literature or journals	6	11	Private
1417	1	1	1	UK	1	13	40	0	0	50	1	0	0	0	5	8	0	1	2	CPD, Conferences, meetings, seminars or lectures	2	11	Private
1418	1	1	1	UK	1	3	27	0	1	45	1	0	0	2	6	4	0	1	1	University or Vet School	7	11	Private
1419	1	1	1	UK	0	24	47	0	0	40	1	0	0	0	9	1	0	1	3	Publications, literature or journals	6	11	Private
1420	1	1	1	UK	1	35	55	1	0	70	1	0	0	0	4	1	0	1	3	Publications, literature or journals	6	11	Private
1421	1	1	1	UK	1	5	27	0	1	60	1	1	1	2	1	0	0	1	1	University or Vet School	7	11	Private
1422	1	1	1	UK	1	35	58	0	2	999999999	0	0	0	999999999	999999999	999999999	0	0	3	0	999999999	11	Private
1423	1	1	1	UK	1	1	23	0	2	35	1	0	0	0	8	2	0	1	1	0	999999999	11	Private
1424	1	1	1	UK	1	2	25	0	0	50	1	0	0	0	5	6	0	1	1	CPD, Conferences, meetings, seminars or lectures	2	11	Private
1425	1	1	1	UK	1	10	34	0	0	35	1	0	0	0	2	9	0	1	2	0	999999999	11	Private
1426	1	1	1	UK	1	8	30	1	0	50	0	1	0	0	5	4	0	1	2	0	999999999	11	Private
1427	1	1	1	UK	1	37	60	0	0	60	1	0	0	0	2	1	0	0	3	0	999999999	11	Private
1428	0	1	1	UK	0	15	36	1	0	550	1	1	1	1	0	4	0	1	2	Colleague or friend	5	11	Gov
1429	0	1	1	UK	0	39	62	0	0	60	1	1	0	5	1	4	0	1	3	0	999999999	11	Other
1430	1	1	1	UK	1	6	33	0	0	60	1	1	0	0	1	6	0	1	1	0	999999999	11	Private
1431	1	1	1	UK	0	35	58	0	0	40	1	0	1	0	1	8	0	0	3	0	999999999	11	Private
1432	1	1	1	UK	0	29	50	0	1	35	1	0	0	0	4	5	0	1	3	Publications, literature or journals	6	11	Private
1433	1	1	1	UK	1	24	47	0	999999999	30	1	1	0	0	9	5	0	1	3	0	999999999	11	Private
1434	1	1	1	UK	1	1	23	0	0	20	1	1	0	0	8	9	0	1	1	University or Vet School	7	11	Private
1435	1	1	1	UK	1	2	25	0	2	30	1	1	0	9	3	0	0	0	1	0	999999999	11	Private
1436	1	1	1	UK	1	3	27	0	2	30	1	0	0	0	1	4	0	1	1	0	999999999	11	Private
1437	1	1	1	UK	0	37	59	0	0	35	1	0	0	0	1	5	0	1	3	CPD, Conferences, meetings, seminars or lectures	2	11	Private
1438	1	1	1	UK	1	3	27	1	1	40	1	0	0	0	1	6	0	1	1	University or Vet School	7	11	Private
1439	1	1	1	UK	0	11	35	1	999999999	45	1	0	0	0	9	4	0	1	2	0	999999999	11	Private
1440	1	1	1	UK	1	8	30	0	0	50	1	1	0	0	2	9	0	0	2	0	999999999	11	Private
1441	1	1	1	UK	1	5	27	0	0	35	1	0	0	0	4	2	0	1	1	University or Vet School	7	11	Private
1442	1	1	1	UK	0	24	47	1	0	200	1	1	0	0	1	2	0	1	3	Publications, literature or journals	6	11	Private
1443	1	1	1	UK	0	32	55	0	2	35	1	0	0	0	1	5	0	0	3	0	999999999	11	Private
1444	1	1	1	UK	1	7	36	1	2	30	1	1	0	2	0	6	0	1	1	University or Vet School	7	11	Private
1445	1	1	1	UK	0	11	34	0	0	40	1	0	0	0	2	4	0	1	2	Colleague or friend	5	11	Private
1446	1	1	1	UK	1	6	28	0	2	35	1	0	0	0	6	2	0	1	1	University or Vet School	7	11	Private
1447	1	1	1	UK	1	6	29	0	2	30	1	0	0	0	1	3	0	1	1	Publications, literature or journals	6	11	Private
1448	0	1	1	UK	1	38	60	0	2	40	1	0	0	1	0	5	0	1	3	Publications, literature or journals	6	11	Public
1449	1	1	1	UK	1	1	25	0	0	20	1	0	0	0	1	2	0	1	1	University or Vet School	7	11	Private
1450	1	1	1	UK	0	9	35	0	0	50	1	1	0	0	2	4	0	1	2	Publications, literature or journals	6	11	Private
1451	1	1	1	UK	1	9	32	0	999999999	40	1	1	1	0	1	2	0	1	2	Publications, literature or journals	6	11	Private
1452	1	1	1	UK	0	6	29	0	0	30	1	1	0	0	1	8	0	1	1	Publications, literature or journals	6	11	Charity
1453	1	1	1	UK	0	15	37	0	0	30	1	0	0	0	8	5	0	1	2	University or Vet School	7	11	Private
1454	1	1	1	UK	1	9	31	1	0	40	1	0	0	0	2	6	0	1	2	University or Vet School	7	11	Private
1455	1	1	1	UK	1	18	41	0	0	35	1	0	0	0	8	1	0	1	2	0	999999999	11	Private
1456	1	1	1	UK	1	36	61	1	0	250	0	1	0	4	0	2	0	1	3	Work place or I teach it	4	11	Private
1457	1	1	1	UK	0	44	68	0	0	30	1	0	0	0	5	0	0	1	3	Publications, literature or journals	6	11	Private
1458	1	1	1	UK	1	3	27	0	1	35	1	0	0	1	0	2	0	1	1	University or Vet School	7	11	Private
1459	1	1	1	UK	0	2	24	0	1	42	1	0	0	0	8	2	0	1	1	0	999999999	11	Private
1460	1	1	1	UK	0	3	28	0	2	50	1	0	0	0	1	4	0	1	1	0	999999999	11	Private
1461	1	1	1	UK	0	28	48	1	0	200	1	0	0	2	3	4	0	1	3	General veterinary or professional knowledge or verbal unknown	5	11	Private
1462	1	1	1	UK	0	35	58	1	1	20	1	0	0	0	8	5	0	1	3	Publications, literature or journals	6	11	Private
1463	1	1	1	UK	1	23	46	1	0	35	1	1	0	0	1	4	0	1	3	Publications, literature or journals	6	11	PrivateUni
1464	0	1	1	UK	0	17	40	1	0	40	1	0	0	1	0	2	0	1	2	Publications, literature or journals	6	11	Charity
1465	1	1	1	UK	1	16	39	0	0	35	0	1	0	9	8	2	0	0	2	0	999999999	11	Private
1466	1	1	1	UK	1	15	37	0	2	35	1	0	0	0	1	2	0	1	2	Veterinary Association	5	11	Private
1467	1	1	1	UK	1	8	31	0	0	60	1	1	1	0	1	9	0	1	2	CPD, Conferences, meetings, seminars or lectures	2	11	Private
1468	1	1	1	UK	1	6	30	0	0	40	1	0	0	1	0	5	0	1	1	0	999999999	11	Private
1469	1	1	1	UK	1	6	30	0	0	30	1	1	0	0	2	7	0	1	1	University or Vet School	7	11	Private
1470	0	1	1	UK	0	14	37	0	0	35	1	0	0	0	1	4	0	1	2	0	999999999	11	Private
1471	1	1	1	UK	1	10	40	1	0	24	1	1	0	0	1	5	0	1	2	Publications, literature or journals	6	11	Private
1472	1	1	1	UK	1	1	23	0	1	999999999	1	1	0	9	1	0	0	1	1	University or Vet School	7	11	Private
1473	1	1	1	UK	0	35	57	1	0	40	0	1	0	0	4	5	0	1	3	Publications, literature or journals	6	11	Private
1474	1	1	1	UK	0	41	64	1	0	40	1	0	0	1	0	9	0	1	3	Publications, literature or journals	6	11	Private
1475	1	1	1	UK	0	4	27	0	1	40	1	0	0	0	9	2	0	1	1	University or Vet School	7	11	Private
1476	1	1	1	UK	1	3	30	1	0	50	1	1	0	0	2	1	0	1	1	Publications, literature or journals	6	11	PrivateOther
1477	1	1	1	UK	0	12	39	0	999999999	35	0	1	0	0	6	3	0	1	2	Don't know	1	11	PrivateCharity
1478	1	1	1	UK	0	9	32	1	0	50	0	1	0	0	4	8	0	1	2	University or Vet School	7	11	Private
1479	1	1	1	UK	0	8	32	1	0	50	1	1	0	1	0	4	0	1	2	University or Vet School	7	11	Private
1480	1	1	1	UK	1	3	24	0	0	45	1	0	0	0	2	4	0	1	1	0	999999999	11	Private
1481	1	1	1	UK	1	21	44	0	0	40	0	1	0	2	3	0	0	1	2	CPD, Conferences, meetings, seminars or lectures	2	11	Private
1482	1	1	1	UK	1	8	32	0	0	50	1	0	0	0	4	3	0	1	2	0	999999999	11	Private
1483	1	1	1	UK	1	10	32	0	0	50	1	0	0	0	1	2	0	1	2	Publications, literature or journals	6	11	Private
1484	1	1	1	UK	0	41	65	0	1	60	1	0	0	5	0	0	0	1	3	Publications, literature or journals	6	11	Private
1485	1	1	1	UK	0	48	72	0	1	40	0	1	0	0	3	5	0	1	3	Publications, literature or journals	6	11	Private
1486	1	1	1	UK	1	3	26	0	2	40	1	1	0	0	2	9	0	1	1	University or Vet School	7	11	Private
1487	1	1	1	UK	1	10	33	0	1	42	1	1	0	0	6	9	0	1	2	Colleague or friend	5	11	Charity
1488	1	1	1	UK	0	21	44	1	0	50	1	0	0	0	2	7	0	1	2	Another discipline e.g. human medicine or science	1	11	Private
1489	1	1	1	UK	0	32	53	0	2	20	1	0	0	2	9	4	0	1	3	General veterinary or professional knowledge or verbal unknown	5	11	Private
1490	999999999	1	1	UK	1	5	29	0	0	35	1	0	1	0	1	4	0	1	1	University or Vet School	7	11	Break
1491	1	1	1	UK	1	17	40	0	0	26	1	0	0	0	8	9	0	1	2	General veterinary or professional knowledge or verbal unknown	5	11	Private
1492	1	1	1	UK	1	4	26	0	2	60	1	0	0	0	6	3	0	1	1	University or Vet School	7	11	Private
1493	1	1	1	UK	0	4	27	0	0	35	1	1	0	10	0	2	0	1	1	0	999999999	11	Private
1494	0	1	1	UK	0	40	62	0	0	10	0	1	0	4	0	1	0	1	3	Publications, literature or journals	6	11	Private
1495	1	1	1	UK	0	7	37	1	0	32	1	0	0	0	1	5	0	1	1	University or Vet School	7	11	Private
1496	0	1	1	UK	1	36	60	1	0	37	1	1	0	1	4	3	0	1	3	Publications, literature or journals	6	11	Gov
1497	1	1	1	UK	0	36	58	0	2	30	0	1	0	0	4	7	0	1	3	Publications, literature or journals	6	11	Private
1498	1	1	1	UK	0	30	52	1	2	50	0	1	0	2	0	8	0	1	3	Publications, literature or journals	6	11	Private
1499	1	1	1	UK	0	37	60	0	1	35	1	0	0	4	2	0	0	1	3	Publications, literature or journals	6	11	Private
1501	0	1	1	UK	1	2	26	1	0	999999999	0	0	0	999999999	999999999	999999999	0	0	1	0	999999999	11	Public
1502	1	1	1	UK	1	2	25	0	0	10	1	1	0	2	9	0	0	1	1	0	999999999	11	Private
1503	1	1	1	UK	0	40	62	0	0	25	1	1	0	0	4	6	0	1	3	0	999999999	11	Private
1504	999999999	1	1	UK	0	42	67	1	0	35	0	1	0	4	2	0	0	1	3	General veterinary or professional knowledge or verbal unknown	5	11	Other
1505	1	1	1	UK	1	3	26	0	0	25	1	0	0	0	5	1	0	1	1	0	999999999	11	Private
1506	1	1	1	UK	1	2	31	1	1	25	1	0	0	2	5	0	0	1	1	0	999999999	11	Private
1507	1	1	1	UK	1	30	53	1	0	50	1	1	0	0	9	1	0	1	3	0	999999999	11	Private
1508	1	1	1	UK	1	9	33	0	1	35	0	1	0	2	9	0	0	1	2	0	999999999	11	Private
1509	0	1	1	UK	1	29	52	1	0	16	1	1	0	4	1	7	0	1	3	0	999999999	11	Uni
1510	1	1	1	UK	1	4	31	1	0	60	1	1	0	0	4	5	0	1	1	University or Vet School	7	11	Private
1511	1	1	1	UK	1	9	33	0	0	45	1	0	0	0	1	2	0	1	2	0	999999999	11	Private
1512	1	1	1	UK	1	22	45	0	0	75	1	1	0	0	5	2	0	1	3	Publications, literature or journals	6	11	Private
1513	1	1	1	UK	1	14	36	1	1	40	1	0	0	0	3	2	0	1	2	University or Vet School	7	11	Private
1514	0	1	1	UK	1	5	30	0	0	5	1	0	0	1	0	6	0	0	1	0	999999999	11	Public
1515	1	1	1	UK	1	3	26	0	1	40	1	0	0	0	1	2	0	1	1	University or Vet School	7	11	Private
1516	1	1	1	UK	0	3	27	0	0	40	1	0	0	0	4	7	0	1	1	University or Vet School	7	11	Private
1517	1	1	1	UK	0	33	57	0	0	35	1	0	0	0	1	1	0	0	3	0	999999999	11	Private
1518	1	1	1	UK	0	22	43	0	2	10	1	0	0	0	6	2	0	1	3	CPD, Conferences, meetings, seminars or lectures	2	11	Private
1519	0	1	1	UK	0	46	68	0	1	999999999	0	0	0	999999999	999999999	999999999	0	1	3	Publications, literature or journals	6	11	PrivatePublic
1520	1	1	1	UK	1	5	28	1	0	40	1	0	0	0	4	1	0	1	1	University or Vet School	7	11	Private
1521	0	1	1	UK	0	26	49	1	0	35	1	0	0	0	4	1	0	1	3	Publications, literature or journals	6	11	Gov
1522	0	1	1	UK	1	8	30	0	0	40	1	0	0	1	4	7	0	1	2	CPD, Conferences, meetings, seminars or lectures	2	11	Industry
1523	1	1	1	UK	0	5	28	0	0	50	1	1	0	0	2	3	0	1	1	University or Vet School	7	11	Private
1524	1	1	1	UK	0	32	57	0	2	35	1	0	0	4	3	1	0	1	3	Work place or I teach it	4	11	Private
1525	1	1	1	UK	1	11	33	0	0	35	1	1	0	1	8	0	0	1	2	University or Vet School	7	11	Private
1526	1	1	1	UK	0	26	48	0	0	50	1	0	0	1	0	4	0	1	3	CPD, Conferences, meetings, seminars or lectures	2	11	Private
1527	1	1	1	UK	0	8	33	0	1	30	1	0	0	0	1	2	0	1	2	0	999999999	11	Private
1528	1	1	1	UK	1	25	49	0	0	20	0	1	0	5	6	0	0	1	3	Publications, literature or journals	6	11	Private
1529	1	1	1	UK	0	35	57	0	0	45	1	0	0	4	0	3	0	1	3	Publications, literature or journals	6	11	Private
1530	1	1	1	UK	0	14	39	1	0	100	1	0	0	0	4	6	0	1	2	Publications, literature or journals	6	11	Private
1531	1	1	1	UK	0	22	44	0	0	999999999	1	0	0	0	8	5	0	1	3	General veterinary or professional knowledge or verbal unknown	5	11	Private
1532	1	1	1	UK	1	1	25	1	2	999999999	0	0	0	999999999	999999999	999999999	0	1	1	University or Vet School	7	11	Private
1533	1	1	1	UK	1	5	29	1	2	50	1	0	0	1	8	0	0	1	1	University or Vet School	7	11	Private
1534	1	1	1	UK	1	25	49	1	0	35	1	1	0	1	0	9	0	1	3	CPD, Conferences, meetings, seminars or lectures	2	11	Private
1535	0	1	1	UK	1	45	67	1	0	9	0	1	0	1	5	6	0	1	3	Publications, literature or journals	6	11	Other
1536	1	1	1	UK	1	2	26	0	0	20	1	0	0	1	0	5	0	1	1	University or Vet School	7	11	Private
1537	1	1	1	UK	1	3	26	0	999999999	20	1	0	0	0	1	2	0	1	1	University or Vet School	7	11	Private
1538	1	1	1	UK	1	999999999	999999999	0	0	10	0	1	0	0	1	4	0	1	999999999	Publications, literature or journals	6	11	Private
1539	1	1	1	UK	0	12	35	0	0	80	1	0	0	0	1	4	0	1	2	Publications, literature or journals	6	11	PrivateIndustry
1540	1	1	1	UK	1	5	28	0	2	30	1	0	0	0	1	4	0	0	1	0	999999999	11	Private
1541	1	1	1	UK	1	27	49	0	0	85	1	0	0	0	2	1	0	1	3	Colleague or friend	5	11	Private
1542	1	1	1	UK	0	12	39	1	0	30	1	0	0	0	4	2	0	1	2	0	999999999	11	Private
1543	0	1	1	UK	1	7	31	1	1	50	1	1	0	1	4	10	0	1	1	PG or specialist study or personal research	4	11	Research
1544	1	1	1	UK	0	31	53	0	0	24	1	0	0	6	5	0	0	1	3	University or Vet School	7	11	Private
1545	1	1	1	UK	0	29	51	0	999999999	37	1	1	0	0	2	3	0	1	3	CPD, Conferences, meetings, seminars or lectures	2	11	PrivateBreakOther
1546	1	1	1	UK	1	3	25	0	0	999999999	1	1	0	2	7	0	0	1	1	University or Vet School	7	11	Private
1547	1	1	1	UK	0	30	53	1	0	40	1	0	0	0	1	2	0	1	3	PG or specialist study or personal research	4	11	Private
1548	1	1	1	UK	1	4	30	1	1	30	1	0	0	0	1	2	0	1	1	0	999999999	11	Private
1549	1	1	1	UK	0	29	51	1	0	50	1	0	0	0	7	8	0	1	3	CPD, Conferences, meetings, seminars or lectures	2	11	Private
1550	1	1	1	UK	0	29	51	0	0	30	1	1	0	4	0	7	0	1	3	Publications, literature or journals	6	11	Private
1551	1	1	1	UK	1	3	25	0	1	40	1	0	0	0	3	9	0	1	1	0	999999999	11	Private
1552	1	1	1	UK	0	16	39	0	2	25	0	1	0	0	3	1	0	1	2	Publications, literature or journals	6	11	Private
1553	1	1	1	UK	1	28	50	1	0	80	0	1	0	0	1	9	0	1	3	Emails, E-list, Electronic forums, networks or internet	3	11	PrivateIndustry
1554	1	1	1	UK	1	25	50	0	0	50	1	1	1	0	2	5	0	1	3	Publications, literature or journals	6	11	Private
1555	1	1	1	UK	1	3	27	0	0	30	1	0	0	0	2	4	0	1	1	0	999999999	11	Private
1556	0	1	1	UK	0	9	31	0	0	20	1	0	0	0	1	2	0	1	2	Publications, literature or journals	6	11	Charity
1557	1	1	1	UK	1	16	40	1	0	20	1	0	0	1	0	4	0	1	2	Publications, literature or journals	6	11	Industry
1558	1	1	1	UK	1	35	59	1	0	35	0	1	0	2	4	0	0	1	3	0	999999999	11	PrivateOther
1559	1	1	1	UK	0	32	54	0	0	50	1	0	0	0	1	5	0	1	3	Don't know	1	11	Private
1560	1	1	1	UK	0	24	47	0	2	24	1	0	0	0	7	5	0	1	3	University or Vet School	7	11	Private
1561	1	1	1	UK	0	24	48	1	1	48	1	0	0	0	4	5	0	1	3	0	999999999	11	PrivateIndustry
1562	1	1	1	UK	1	6	29	1	0	60	1	1	0	10	0	1	0	1	1	Publications, literature or journals	6	11	Private
1563	1	1	1	UK	1	4	26	0	0	40	1	1	0	0	8	9	0	1	1	University or Vet School	7	11	Private
1564	1	1	1	UK	1	10	33	1	1	30	1	0	0	0	2	2	0	0	2	0	999999999	11	Private
1565	1	1	1	UK	1	8	34	0	0	35	1	0	0	4	9	3	0	1	2	0	999999999	11	Private
1566	1	1	1	UK	0	41	64	0	0	30	1	0	0	0	5	6	0	0	3	0	999999999	11	Private
1567	0	1	1	UK	0	26	53	1	0	10	1	0	0	0	6	7	0	1	3	PG or specialist study or personal research	4	11	GovCharity
1568	1	1	1	UK	1	22	47	0	2	25	1	1	1	9	0	5	0	0	3	0	999999999	11	Private
1569	1	1	1	UK	0	18	41	0	0	50	1	0	0	0	1	5	0	1	2	0	999999999	11	Private
1570	1	1	1	UK	0	15	38	0	0	40	0	1	0	0	1	5	0	1	2	CPD, Conferences, meetings, seminars or lectures	2	11	PrivateOutside
1571	1	1	1	UK	0	28	51	0	0	40	1	0	1	0	2	7	0	1	3	Veterinary Association	5	11	Private
1572	1	1	1	UK	0	34	56	0	2	25	1	0	0	1	5	9	0	1	3	University or Vet School	7	11	Private
1573	1	1	1	UK	1	10	33	0	2	20	1	0	0	1	9	0	0	1	2	University or Vet School	7	11	Private
1574	1	1	1	UK	1	15	37	1	0	40	1	1	1	0	2	9	0	1	2	Publications, literature or journals	6	11	Private
1575	0	1	1	UK	0	43	65	0	2	35	1	1	0	2	0	4	0	0	3	0	999999999	11	Public
1576	1	1	1	UK	0	2	26	1	0	230	1	1	0	2	0	4	0	1	1	University or Vet School	7	11	Private
1577	1	1	1	UK	1	5	30	0	0	60	1	0	0	9	8	3	0	1	1	University or Vet School	7	11	Private
1578	1	1	1	UK	1	5	31	0	1	40	1	0	0	0	1	5	0	1	1	University or Vet School	7	11	Private
1579	1	1	1	UK	1	18	44	1	0	37	0	1	0	1	9	8	0	0	2	0	999999999	11	Private
1580	1	1	1	UK	1	2	30	0	2	999999999	0	1	0	2	0	3	0	0	1	0	999999999	11	Private
1581	1	1	1	UK	0	31	56	0	1	30	1	0	0	0	1	8	0	1	3	General veterinary or professional knowledge or verbal unknown	5	11	Private
1582	1	1	1	UK	1	20	42	0	0	50	1	1	1	0	1	9	0	1	2	Publications, literature or journals	6	11	Private
1583	1	1	1	UK	1	33	54	1	2	26	1	0	0	9	0	0	0	0	3	0	999999999	11	PrivateOutside
1584	1	1	1	UK	1	37	60	0	0	999999999	0	1	0	4	999999999	0	0	1	3	0	999999999	11	Private
1585	1	1	1	UK	0	16	38	0	2	100	1	0	0	0	7	5	0	1	2	0	999999999	11	Private
1586	1	1	1	UK	0	9	31	1	0	40	1	0	0	1	0	9	0	1	2	University or Vet School	7	11	Private
1587	0	1	1	UK	0	49	74	0	1	999999999	0	0	0	999999999	999999999	999999999	0	0	3	0	999999999	11	Other
1588	1	1	1	UK	1	8	32	1	2	120	1	1	0	4	1	5	0	1	2	0	999999999	11	Private
1589	1	1	1	UK	1	6	34	0	1	40	1	1	0	0	2	9	0	0	1	0	999999999	11	Private
1590	0	1	1	UK	0	15	38	1	0	40	1	0	0	6	4	1	0	1	2	Publications, literature or journals	6	11	Path
1591	0	1	1	UK	1	16	38	1	0	48	1	1	0	0	1	2	0	1	2	PG or specialist study or personal research	4	11	Army
1592	1	1	1	UK	0	9	31	1	999999999	40	1	0	0	1	9	0	0	1	2	Don't know	1	11	Private
1593	1	1	1	UK	1	9	32	1	0	40	1	0	0	0	2	9	0	1	2	0	999999999	11	Private
1594	1	1	1	UK	1	15	39	0	0	20	1	1	0	0	1	2	0	1	2	0	999999999	11	Private
1595	1	1	1	UK	1	8	31	0	1	25	1	0	0	0	2	5	0	1	2	Publications, literature or journals	6	11	Private
1596	1	1	1	UK	0	6	30	0	0	50	1	1	0	1	0	5	0	1	1	CPD, Conferences, meetings, seminars or lectures	2	11	Private
1597	1	1	1	UK	1	6	29	1	0	40	1	1	0	0	1	2	0	1	1	University or Vet School	7	11	Private
1598	1	1	1	UK	1	3	26	1	1	40	1	1	0	1	0	9	0	1	1	University or Vet School	7	11	Private
1599	1	1	1	UK	1	5	31	1	2	20	1	0	0	0	1	6	0	1	1	University or Vet School	7	11	Private
1600	1	1	1	UK	1	5	32	1	0	35	1	0	0	0	2	8	0	1	1	University or Vet School	7	11	Private
1601	1	1	1	UK	1	10	39	1	0	40	1	0	0	1	0	3	0	1	2	Don't know	1	11	Private
1602	1	1	1	UK	0	34	58	1	0	100	1	0	0	0	6	3	0	1	3	University or Vet School	7	11	Private
1603	0	1	1	UK	1	30	53	1	2	50	1	1	0	1	4	9	0	1	3	Publications, literature or journals	6	11	Private
1604	1	1	1	UK	0	10	35	0	0	150	1	1	0	3	0	1	0	1	2	University or Vet School	7	11	Private
1605	1	1	1	UK	1	19	45	1	0	40	1	1	0	1	0	4	0	1	2	0	999999999	11	Private
1606	1	1	1	UK	1	19	46	0	0	35	0	1	0	0	7	1	0	1	2	Publications, literature or journals	6	11	Private
1607	1	1	1	UK	1	13	42	0	0	30	0	1	0	1	3	4	0	1	2	Publications, literature or journals	6	11	Private
1608	0	1	1	UK	0	45	67	0	1	10	0	1	0	1	5	7	0	0	3	0	999999999	11	Public
1609	1	1	1	UK	0	19	42	1	0	100	1	1	0	1	2	0	0	1	2	CPD, Conferences, meetings, seminars or lectures	2	11	Private
1610	1	1	1	UK	1	6	30	0	0	35	1	1	0	1	0	2	0	1	1	CPD, Conferences, meetings, seminars or lectures	2	11	Private
1611	1	1	1	UK	0	38	64	1	1	400	0	1	0	2	3	7	0	1	3	Ubiquitous or various and multiple sources	1	11	PrivateOutside
1612	1	1	1	UK	0	21	42	1	0	55	1	0	0	2	0	9	0	1	2	Publications, literature or journals	6	11	Private
1613	1	1	1	UK	1	10	32	0	0	70	1	0	0	9	1	2	0	0	2	0	999999999	11	Private
1614	1	1	1	UK	0	8	30	1	1	40	1	0	0	0	2	1	0	1	2	Publications, literature or journals	6	11	Private
1615	1	1	1	UK	1	18	41	0	2	36	1	0	0	0	1	4	0	1	2	CPD, Conferences, meetings, seminars or lectures	2	11	Private
1616	0	1	1	UK	0	43	66	0	0	20	0	1	0	1	5	0	0	1	3	Publications, literature or journals	6	11	Public
1617	0	1	1	UK	0	5	29	1	0	30	1	0	0	6	8	999999999	0	0	1	0	999999999	11	Public
1618	1	1	1	UK	1	7	31	0	0	50	1	1	1	0	9	1	0	1	1	University or Vet School	7	11	PrivateGovCharity
1619	1	1	1	UK	0	6	30	0	0	100	1	1	1	10	4	0	0	1	1	Don't know	1	11	Private
1622	1	1	1	UK	1	26	49	0	2	35	1	1	0	2	1	10	0	1	3	Publications, literature or journals	6	11	Private
1623	0	1	1	UK	1	37	57	0	0	40	1	1	0	1	2	0	0	1	3	Publications, literature or journals	6	11	Gov
1624	1	1	1	UK	0	29	51	0	1	999999999	0	0	0	999999999	999999999	999999999	0	1	3	CPD, Conferences, meetings, seminars or lectures	2	11	Private
1625	1	1	1	UK	1	13	34	0	0	50	1	1	0	0	5	4	0	1	2	CPD, Conferences, meetings, seminars or lectures	2	11	Other
1626	1	1	1	UK	0	13	35	1	0	50	1	0	1	10	0	3	0	1	2	0	999999999	11	Private
1627	1	1	1	UK	0	6	30	0	2	40	1	1	1	1	0	5	0	1	1	University or Vet School	7	11	PrivateCharity
1628	0	1	1	UK	0	24	51	0	2	50	1	0	0	0	9	4	0	0	3	0	999999999	11	PathIndustry
1629	1	1	1	UK	0	32	54	0	2	40	0	1	0	0	5	9	0	1	3	Colleague or friend	5	11	Private
1630	1	1	1	UK	0	31	53	1	0	30	1	0	0	2	4	0	0	1	3	Publications, literature or journals	6	11	Private
1631	0	1	1	UK	0	12	41	1	0	45	1	0	0	0	2	4	0	1	2	Emails, E-list, Electronic forums, networks or internet	3	11	Public
1632	0	1	1	UK	0	9	35	0	2	30	1	1	0	0	9	2	0	1	2	0	999999999	11	Public
1634	1	1	1	UK	1	18	40	1	0	40	1	0	0	9	0	10	0	1	2	Colleague or friend	5	11	Private
1635	1	1	1	UK	1	10	34	0	2	40	1	1	0	2	3	4	0	1	2	University or Vet School	7	11	Private
1636	1	1	1	UK	1	13	38	0	2	35	1	1	0	9	2	0	0	1	2	Emails, E-list, Electronic forums, networks or internet	3	11	Private
1637	1	1	1	UK	1	3	29	0	1	20	1	1	0	1	0	5	0	1	1	University or Vet School	7	11	Private
1638	1	1	1	UK	0	5	28	0	2	40	1	0	0	0	1	1	0	1	1	University or Vet School	7	11	Private
1639	1	1	1	UK	1	19	43	1	1	735	1	1	1	10	10	10	0	1	2	CPD, Conferences, meetings, seminars or lectures	2	11	Private
1640	1	1	1	UK	1	2	25	1	0	40	1	0	0	0	1	3	0	1	1	Publications, literature or journals	6	11	Private
1641	1	1	1	UK	1	17	39	1	2	45	1	0	0	0	1	9	0	1	2	CPD, Conferences, meetings, seminars or lectures	2	11	Private
1642	1	1	1	UK	1	7	29	0	0	35	1	0	0	2	4	0	0	1	1	0	999999999	11	Private
1643	1	1	1	UK	0	6	28	0	0	35	1	0	1	0	9	4	0	1	1	0	999999999	11	Private
1644	1	1	1	UK	0	31	54	1	0	70	1	0	0	0	6	4	0	1	3	Colleague or friend	5	11	Private
1645	1	1	1	UK	0	27	49	1	0	100	1	1	0	0	1	4	0	1	3	University or Vet School	7	11	Private
1646	1	1	1	UK	1	3	24	0	2	50	1	0	0	0	8	6	0	1	1	0	999999999	11	Private
1647	1	1	1	UK	0	15	38	0	0	999999999	1	1	1	0	2	9	0	1	2	Another discipline e.g. human medicine or science	1	11	Private
1648	1	1	1	UK	0	23	46	1	0	35	1	0	0	0	8	9	0	1	3	Publications, literature or journals	6	11	Private
1649	1	1	1	UK	1	20	42	0	0	50	1	0	0	0	10	5	0	1	2	Emails, E-list, Electronic forums, networks or internet	3	11	Private
1650	1	1	1	UK	0	27	49	0	2	45	1	0	0	0	6	3	0	1	3	Publications, literature or journals	6	11	Private
1651	1	1	1	UK	0	32	55	0	0	40	1	0	0	2	3	0	0	1	3	CPD, Conferences, meetings, seminars or lectures	2	11	Private
1652	1	1	1	UK	1	31	53	0	0	35	1	0	0	0	2	1	0	1	3	Publications, literature or journals	6	11	Private
1653	1	1	1	UK	1	4	26	0	0	40	1	0	0	0	1	2	0	1	1	University or Vet School	7	11	Private
1654	0	1	1	UK	0	42	64	0	0	150	0	1	0	1	4	6	0	1	3	General veterinary or professional knowledge or verbal unknown	5	11	Other
1655	1	1	1	UK	1	2	27	0	2	35	0	1	0	0	1	4	0	1	1	0	999999999	11	Private
1656	1	1	1	UK	1	33	53	1	1	150	1	1	0	0	1	5	0	1	3	Publications, literature or journals	6	11	Private
1657	1	1	1	UK	0	45	66	1	0	700	1	1	0	4	5	0	0	1	3	Publications, literature or journals	6	11	Private
1658	0	1	1	UK	1	27	50	0	2	37	1	0	0	2	0	5	0	1	3	Publications, literature or journals	6	11	Gov
1659	1	1	1	UK	0	2	24	0	0	40	1	1	0	0	2	1	0	1	1	University or Vet School	7	11	Private
1660	1	1	1	UK	1	8	31	0	0	30	1	1	0	0	9	2	0	1	2	0	999999999	11	Private
1661	1	1	1	UK	1	15	39	0	0	40	0	1	0	3	9	0	0	0	2	0	999999999	11	Private
1662	1	1	1	UK	1	3	28	1	1	35	1	1	0	0	1	5	0	1	1	Ubiquitous or various and multiple sources	1	11	Private
1663	1	1	1	UK	0	34	57	0	0	25	0	1	0	5	7	1	0	1	3	Publications, literature or journals	6	11	Private
1664	1	1	1	UK	1	12	36	0	0	50	1	1	0	2	0	4	0	1	2	University or Vet School	7	11	Private
1665	1	1	1	UK	1	9	32	0	0	900	1	0	0	1	4	10	0	1	2	0	999999999	11	Uni
1666	1	1	1	UK	0	4	27	0	0	40	1	0	0	0	1	3	0	1	1	General veterinary or professional knowledge or verbal unknown	5	11	Private
1667	1	1	1	UK	0	37	59	0	2	40	0	1	0	0	4	2	0	1	3	General veterinary or professional knowledge or verbal unknown	5	11	Private
1668	1	1	1	UK	1	8	36	0	2	45	1	0	0	0	9	2	0	1	2	Publications, literature or journals	6	11	Private
1669	1	1	1	UK	1	12	38	1	0	70	1	1	0	0	1	9	0	1	2	Colleague or friend	5	11	Private
1670	1	1	1	UK	0	6	27	0	0	100	1	0	1	9	2	0	0	1	1	University or Vet School	7	11	Private
1671	1	1	1	UK	1	17	39	1	1	35	1	1	0	2	0	9	0	1	2	CPD, Conferences, meetings, seminars or lectures	2	11	Private
1672	1	1	1	UK	1	20	44	1	1	35	1	0	0	1	0	5	0	1	2	Publications, literature or journals	6	11	Private
1673	0	1	1	UK	1	29	52	0	0	60	1	0	0	0	6	1	0	1	3	Publications, literature or journals	6	11	Other
1674	1	1	1	UK	1	9	34	1	2	40	1	1	0	0	1	2	0	1	2	University or Vet School	7	11	Charity
1675	1	1	1	UK	0	2	25	0	1	3	1	0	0	0	2	9	0	1	1	0	999999999	11	Private
1676	0	1	1	UK	1	8	33	1	2	150	1	1	0	1	0	9	0	0	2	0	999999999	11	UniPath
1677	0	1	1	UK	1	61	82	1	0	999999999	0	0	0	999999999	999999999	999999999	0	0	3	0	999999999	11	UniGov
1678	1	1	1	UK	1	2	25	0	0	30	1	1	0	0	5	9	0	1	1	0	999999999	11	Private
1680	1	1	1	UK	1	19	45	1	0	40	1	0	0	0	5	8	0	1	2	CPD, Conferences, meetings, seminars or lectures	2	11	Charity
1682	1	1	1	UK	1	4	28	0	0	1000	0	0	1	1	0	6	0	1	1	Work place or I teach it	4	11	Uni
1683	1	1	1	UK	1	15	30	0	0	100	1	1	1	2	1	0	0	1	2	Another discipline e.g. human medicine or science	1	11	Private
1684	1	1	1	UK	0	10	33	1	1	500	0	1	0	4	6	8	0	1	2	University or Vet School	7	11	Uni
1685	1	1	1	UK	0	19	42	1	0	40	1	0	0	1	9	4	0	1	2	0	999999999	11	Private
1686	1	1	1	UK	0	5	28	0	0	50	1	1	0	1	0	4	0	1	1	University or Vet School	7	11	Private
1687	1	1	1	UK	1	3	26	0	0	60	0	1	0	0	1	9	0	1	1	University or Vet School	7	11	Private
1688	1	1	1	UK	1	19	43	1	0	100	1	1	1	4	1	0	0	1	2	Work place or I teach it	4	11	Uni
1689	1	1	1	UK	1	38	60	1	1	50	1	1	0	0	9	2	0	1	3	Publications, literature or journals	6	11	Private
1690	1	1	1	UK	1	7	31	1	1	25	1	0	0	1	6	9	0	1	1	0	999999999	11	Private
1691	1	1	1	UK	1	10	33	0	0	35	1	0	0	0	9	2	0	1	2	0	999999999	11	Private
1692	0	1	1	UK	1	9	36	1	1	140	1	1	0	1	4	9	0	1	2	University or Vet School	7	11	UniPath
1693	0	1	1	UK	0	59	83	1	0	150	0	1	0	2	4	3	0	1	3	Another discipline e.g. human medicine or science	1	11	UniResearchPath
1694	0	1	1	UK	1	42	65	1	1	999999999	0	0	0	7	999999999	999999999	0	1	3	Publications, literature or journals	6	11	Uni
1695	1	1	1	UK	0	28	53	1	0	25	0	1	0	1	4	7	0	1	3	Publications, literature or journals	6	11	Private
1696	1	1	1	UK	1	10	35	0	0	45	1	0	0	0	4	6	0	0	2	0	999999999	11	PrivateCharity
1697	1	1	1	UK	1	35	58	0	0	40	1	1	0	0	1	6	0	1	3	0	999999999	11	PrivateUni
1698	1	1	1	UK	1	13	38	1	0	100	0	1	0	0	6	2	0	1	2	0	999999999	11	Uni
1699	0	1	1	UK	1	23	999999999	1	0	100	0	1	0	1	0	2	0	1	3	0	999999999	11	Uni
1700	1	1	1	UK	1	10	33	1	0	50	1	1	0	0	9	2	0	1	2	0	999999999	11	Private
1701	1	1	1	UK	1	17	40	1	0	40	1	0	0	2	0	5	0	1	2	0	999999999	11	Private
1702	1	1	1	UK	1	15	36	0	0	40	1	1	0	0	0	7	0	1	2	0	999999999	11	Private
1703	1	1	1	UK	1	10	32	1	1	30	0	1	0	1	0	4	0	1	2	Work place or I teach it	4	11	Uni
1704	1	1	1	UK	0	8	31	0	0	16	1	0	0	1	8	4	0	0	2	0	999999999	11	Private
1705	1	1	1	UK	1	22	47	1	0	40	1	1	0	0	5	1	0	1	3	0	999999999	11	Private
1706	0	1	1	UK	1	999999999	53	1	0	240	1	0	0	0	1	9	0	1	999999999	PG or specialist study or personal research	4	11	Gov
1707	0	1	1	UK	1	8	31	1	0	999999999	0	0	0	999999999	999999999	999999999	0	1	2	Publications, literature or journals	6	11	Research
1708	1	1	1	UK	1	5	29	1	0	40	1	1	0	0	1	9	0	1	1	0	999999999	11	Private
1709	1	1	1	UK	0	8	30	1	1	40	0	1	0	1	4	0	0	1	2	University or Vet School	7	11	Uni
1710	1	1	1	UK	1	10	34	1	0	100	0	1	0	0	2	3	0	1	2	0	999999999	11	Private
1711	1	1	1	UK	1	3	28	1	0	55	1	1	0	0	1	2	0	1	1	University or Vet School	7	11	Private
1712	1	1	1	UK	1	16	37	1	1	100	0	1	0	1	1	7	0	1	2	0	999999999	11	Uni
1713	0	1	1	UK	0	3	28	0	0	35	1	0	0	1	0	4	0	1	1	Publications, literature or journals	6	11	Private
1714	1	1	1	UK	1	10	35	1	999999999	35	1	0	0	0	1	9	0	1	2	Publications, literature or journals	6	11	Private
1715	0	1	1	UK	1	4	29	1	999999999	70	0	1	0	1	0	5	0	1	1	Publications, literature or journals	6	11	Research
1716	1	1	1	UK	1	6	29	0	2	400	1	1	0	0	1	2	0	1	1	University or Vet School	7	11	Uni
1717	0	1	1	UK	1	7	32	1	0	80	1	0	0	1	4	5	0	1	1	Publications, literature or journals	6	11	Research
1718	0	1	1	UK	1	22	59	0	2	999999999	1	0	0	0	6	5	0	0	3	0	999999999	11	Gov
1719	1	1	1	UK	1	16	41	1	0	60	1	1	0	4	1	0	0	1	2	0	999999999	11	Uni
1720	1	1	1	UK	0	7	29	0	2	40	1	1	1	0	4	1	0	1	1	0	999999999	11	Private
1721	1	1	1	UK	1	22	47	1	1	60	0	0	1	1	0	1	0	1	3	University or Vet School	7	11	UniResearch
1722	1	1	1	UK	1	19	43	1	999999999	35	1	1	0	0	0	1	0	1	2	Publications, literature or journals	6	11	Private
1723	1	1	1	UK	1	5	38	1	0	70	1	0	0	0	1	8	0	0	1	0	999999999	11	Private
1725	1	1	1	UK	0	23	47	1	1	45	1	1	1	4	1	0	0	1	3	0	999999999	11	Private
1726	1	1	1	UK	1	31	54	1	1	140	1	0	0	1	4	0	0	1	3	0	999999999	11	PrivateResearch
1728	1	1	1	UK	1	20	42	0	0	25	0	1	0	0	7	4	0	0	2	0	999999999	11	Private
1729	1	1	1	UK	0	6	29	1	0	8	1	1	0	4	6	1	0	1	1	University or Vet School	7	11	Uni
1730	1	1	1	UK	0	9	32	1	0	300	1	0	0	0	4	8	0	1	2	Work place or I teach it	4	11	PrivateUniResearch
1731	1	1	1	UK	1	2	27	1	1	35	1	1	0	0	1	3	0	1	1	University or Vet School	7	11	Charity
1732	0	1	1	UK	1	10	33	1	0	10	1	0	1	1	4	6	0	1	2	Colleague or friend	5	11	ResearchCharity
1733	1	1	1	UK	0	35	57	1	1	999999999	0	1	1	1	4	6	0	1	3	0	999999999	11	PrivateUni
1735	1	1	1	UK	1	2	33	1	0	30	1	0	0	0	1	3	0	1	1	0	999999999	11	Private
1736	1	1	1	UK	0	17	40	1	0	20	1	0	0	0	8	9	0	1	2	0	999999999	11	Private
1737	1	1	1	UK	0	9	33	1	0	40	1	1	0	0	5	1	0	1	2	0	999999999	11	Private
1738	1	1	1	UK	1	999999999	30	0	0	600	1	1	0	0	4	1	0	1	999999999	Publications, literature or journals	6	11	Charity
1739	1	1	1	UK	1	13	35	0	0	35	1	1	0	0	5	1	0	1	2	Veterinary Association	5	11	Private
1740	1	1	1	UK	0	17	39	0	0	100	1	0	0	4	1	0	0	1	2	Colleague or friend	5	11	Private
1741	1	1	1	UK	0	11	34	0	1	35	1	0	0	0	1	4	0	1	2	Publications, literature or journals	6	11	Private
1742	1	1	1	UK	0	7	38	1	1	36	1	1	1	0	5	6	0	1	1	University or Vet School	7	11	Private
1743	1	1	1	UK	0	39	61	0	0	50	1	1	0	4	8	9	0	1	3	Publications, literature or journals	6	11	Private
1744	1	1	1	UK	1	8	31	1	2	50	1	1	0	1	0	3	0	1	2	0	999999999	11	Private
1745	1	1	1	UK	999999999	999999999	999999999	1	0	100	1	1	0	1	4	0	0	1	999999999	0	999999999	11	Private
1746	1	1	1	UK	0	9	32	1	0	75	1	1	0	1	4	0	0	1	2	University or Vet School	7	11	Private
1747	1	1	1	UK	0	19	42	1	1	100	1	1	1	0	1	3	0	1	2	CPD, Conferences, meetings, seminars or lectures	2	11	Private
1748	1	1	1	UK	0	6	29	1	0	50	0	0	1	5	1	0	0	1	1	Another discipline e.g. human medicine or science	1	11	Private
1749	1	1	1	UK	1	29	51	0	0	50	1	0	0	0	6	4	0	1	3	Publications, literature or journals	6	11	Private
1750	1	1	1	UK	1	9	34	1	0	80	1	0	0	0	3	2	0	1	2	University or Vet School	7	11	Charity
1751	1	1	1	UK	0	33	57	1	0	20	1	0	0	0	4	8	0	1	3	Ubiquitous or various and multiple sources	1	11	Private
1753	1	1	1	UK	1	8	31	0	2	40	1	1	0	0	1	9	0	1	2	0	999999999	11	Private
1754	1	1	1	UK	1	16	38	0	0	35	1	1	0	9	1	2	0	1	2	0	999999999	11	Other
1755	1	1	1	UK	0	15	41	1	2	30	0	1	0	1	4	0	0	1	2	Publications, literature or journals	6	11	Private
1756	0	1	1	UK	0	10	31	0	2	20	1	0	0	0	2	3	0	0	2	0	999999999	11	Gov
1757	1	1	1	UK	1	8	31	1	2	40	1	0	0	0	1	5	0	1	2	University or Vet School	7	11	Private
1758	1	1	1	UK	1	5	27	1	0	40	1	0	0	0	2	3	0	1	1	University or Vet School	7	11	Private
1759	1	1	1	UK	1	6	30	1	2	44	1	1	0	0	1	2	0	1	1	University or Vet School	7	11	Private
1760	1	1	1	UK	1	10	33	0	0	35	1	1	0	0	0	6	0	1	2	0	999999999	11	Private
1761	1	1	1	UK	0	9	34	0	0	35	1	0	0	0	4	2	0	1	2	Publications, literature or journals	6	11	Private
1762	0	1	1	UK	0	44	65	1	1	40	1	0	0	1	0	4	0	0	3	0	999999999	11	PrivatePath
1763	1	1	1	UK	1	3	27	0	0	40	1	1	0	0	1	6	0	1	1	0	999999999	11	Private
1764	1	1	1	UK	1	21	44	1	0	60	0	1	0	0	1	6	0	1	2	Veterinary Association	5	11	Private
1765	1	1	1	UK	1	6	30	1	0	200	0	1	0	0	9	7	0	1	1	PG or specialist study or personal research	4	11	Private
1766	0	1	1	UK	0	29	52	1	2	40	1	1	0	0	4	5	0	1	3	Veterinary Association	5	11	Gov
1767	0	1	1	UK	0	29	51	0	1	40	1	1	0	5	1	0	0	1	3	Publications, literature or journals	6	11	Gov
1768	1	1	1	UK	1	6	48	1	1	40	1	0	0	0	1	2	0	1	1	Work place or I teach it	4	11	Private
1769	1	1	1	UK	1	5	28	0	0	45	1	1	0	1	0	2	0	1	1	Publications, literature or journals	6	11	Private
1770	1	1	1	UK	0	16	40	1	0	50	1	1	0	0	1	8	0	1	2	Publications, literature or journals	6	11	Private
1771	1	1	1	UK	0	34	58	0	1	60	1	0	0	4	0	0	0	1	3	Publications, literature or journals	6	11	Private
1772	1	1	1	UK	0	34	56	1	0	40	1	1	0	4	5	1	0	1	3	University or Vet School	7	11	Other
1773	1	1	1	UK	0	31	53	0	0	10	0	1	0	4	0	2	0	1	3	Publications, literature or journals	6	11	Private
1774	0	1	1	UK	1	25	48	1	0	40	1	0	0	1	0	4	0	1	3	0	999999999	11	Gov
1775	0	1	1	UK	0	19	40	1	0	30	1	0	0	0	1	7	0	1	2	Publications, literature or journals	6	11	Public
1776	0	1	1	UK	0	38	64	1	2	50	0	0	1	1	0	4	0	1	3	Ubiquitous or various and multiple sources	1	11	Gov
1777	0	1	1	UK	0	43	64	1	0	150	1	1	1	1	4	6	0	1	3	University or Vet School	7	11	Path
1778	1	1	1	UK	1	29	51	1	1	40	1	0	0	1	0	2	0	1	3	University or Vet School	7	11	Industry
1779	1	1	1	UK	0	19	42	1	2	40	1	0	0	0	5	9	0	1	2	Publications, literature or journals	6	11	Private
1780	0	1	1	UK	0	18	40	0	0	16	1	0	0	0	1	2	0	0	2	0	999999999	11	Public
1781	0	1	1	UK	1	10	33	1	0	50	1	0	0	0	3	5	0	0	2	0	999999999	11	Path
1782	1	1	1	UK	0	40	62	0	1	999999999	0	0	0	999999999	999999999	999999999	0	1	3	Colleague or friend	5	11	PrivatePublic
1783	1	1	1	UK	1	9	33	0	0	45	1	1	0	0	6	2	0	1	2	Publications, literature or journals	6	11	Private
1784	1	1	1	UK	1	6	32	1	0	30	1	1	0	0	1	9	0	1	1	University or Vet School	7	11	Private
1785	1	1	1	UK	1	4	28	0	0	60	1	1	0	0	8	5	0	1	1	University or Vet School	7	11	Private
1787	0	1	1	UK	1	26	50	1	0	80	0	1	0	1	0	7	0	1	3	Colleague or friend	5	11	CharityOutsideOther
1788	1	1	1	UK	1	3	26	1	0	22	1	0	0	10	4	0	0	0	1	0	999999999	11	Uni
1789	1	1	1	UK	1	7	34	1	0	50	1	1	0	0	1	5	0	1	1	University or Vet School	7	11	Private
1791	0	1	1	UK	0	22	48	1	0	50	1	0	0	0	2	7	0	1	3	Publications, literature or journals	6	11	Other
1792	1	1	1	UK	1	13	36	0	2	35	0	1	0	2	3	5	0	0	2	0	999999999	11	Private
1793	1	1	1	UK	1	25	50	1	0	40	1	0	0	0	8	2	0	1	3	General veterinary or professional knowledge or verbal unknown	5	11	Private
1794	1	1	1	UK	1	26	49	0	0	100	1	1	0	0	4	9	0	1	3	Publications, literature or journals	6	11	Private
1795	1	1	1	UK	1	31	53	0	0	50	1	1	0	0	6	5	0	1	3	Another discipline e.g. human medicine or science	1	11	Private
1796	1	1	1	UK	1	18	42	0	0	40	1	1	0	2	0	1	0	1	2	University or Vet School	7	11	Private
1797	1	1	1	UK	1	6	33	1	1	100	1	0	0	2	0	7	0	1	1	0	999999999	11	Private
1798	1	1	1	UK	0	14	42	1	0	200	1	1	0	0	4	1	0	1	2	Publications, literature or journals	6	11	Private
1799	1	1	1	UK	0	31	53	0	1	40	1	1	1	0	9	5	0	1	3	0	999999999	11	Private
1800	1	1	1	UK	1	11	34	0	0	60	1	1	0	0	6	1	0	0	2	0	999999999	11	Private
1801	0	1	1	UK	0	37	59	0	0	80	1	0	0	1	0	4	0	1	3	Publications, literature or journals	6	11	Industry
1802	1	1	1	UK	0	21	43	0	0	40	1	0	1	1	0	5	0	1	2	0	999999999	11	Private
1803	0	1	1	UK	1	9	32	1	0	300	1	1	0	0	1	0	0	1	2	0	999999999	11	Industry
1804	1	1	1	UK	1	21	46	1	0	60	0	0	1	4	1	0	0	1	2	Publications, literature or journals	6	11	Private
1805	1	1	1	UK	0	9	34	1	0	40	1	1	0	1	0	4	0	1	2	University or Vet School	7	11	Private
1806	1	1	1	UK	1	35	59	1	0	999999999	0	1	0	0	4	1	0	1	3	University or Vet School	7	11	Private
1807	1	1	1	UK	0	7	29	0	0	40	1	0	0	0	7	6	0	1	1	University or Vet School	7	11	Private
1808	1	1	1	UK	1	8	30	0	1	999999999	0	1	0	0	1	9	0	1	2	CPD, Conferences, meetings, seminars or lectures	2	11	Private
1809	0	1	1	UK	0	39	62	0	2	50	0	1	0	0	6	2	0	1	3	Work place or I teach it	4	11	Other
1810	0	1	1	UK	1	33	55	0	2	35	1	0	0	0	8	4	0	1	3	Veterinary Association	5	11	Private
1811	1	1	1	UK	1	5	28	0	0	40	1	1	0	0	9	6	0	1	1	0	999999999	11	Private
1812	1	1	1	UK	1	10	33	0	1	40	1	0	0	0	1	5	0	1	2	0	999999999	11	Private
1813	1	1	1	UK	1	6	32	1	0	40	1	0	0	0	1	2	0	1	1	0	999999999	11	Private
1814	1	1	1	UK	0	14	43	0	2	40	1	1	0	0	1	7	0	1	2	0	999999999	11	Private
1815	0	1	1	UK	1	19	42	1	0	35	1	1	0	1	0	2	0	1	2	0	999999999	11	Path
1816	1	1	1	UK	1	27	50	0	0	12	1	1	0	0	9	5	0	0	3	0	999999999	11	Private
1817	1	1	1	UK	1	36	59	1	0	40	1	1	0	0	1	9	0	1	3	University or Vet School	7	11	Private
1818	1	1	1	UK	0	29	53	1	0	50	1	0	0	0	1	6	0	1	3	0	999999999	11	Private
1819	1	1	1	UK	1	9	30	0	1	50	1	0	0	0	2	4	0	1	2	General veterinary or professional knowledge or verbal unknown	5	11	Private
1820	1	1	1	UK	1	3	26	0	2	35	1	0	0	0	9	5	0	0	1	0	999999999	11	Private
1821	0	1	1	UK	0	5	29	1	1	200	0	1	0	0	4	2	0	1	1	University or Vet School	7	11	UniResearch
1822	1	1	1	UK	1	5	27	0	1	50	1	1	0	1	0	4	0	1	1	0	999999999	11	Private
1823	1	1	1	UK	0	10	33	0	1	40	1	0	0	0	1	4	0	1	2	Publications, literature or journals	6	11	Private
1824	1	1	1	UK	1	5	30	0	0	35	1	1	0	0	2	6	0	0	1	0	999999999	11	Private
1825	1	1	1	UK	1	6	29	0	1	60	1	1	0	0	2	9	0	1	1	University or Vet School	7	11	Private
1826	0	1	1	UK	1	5	46	1	0	999999999	1	1	0	4	0	2	0	1	1	University or Vet School	7	11	Other
1828	1	1	1	UK	1	9	32	1	0	35	1	1	0	0	9	2	0	1	2	PG or specialist study or personal research	4	11	Private
1829	1	1	1	UK	1	7	29	1	2	40	1	1	0	0	2	5	0	1	1	0	999999999	11	Private
1830	1	1	1	UK	1	21	44	0	1	30	1	1	1	0	9	5	0	1	2	0	999999999	11	Private
1831	1	1	1	UK	1	6	29	1	0	40	1	0	0	0	5	1	0	1	1	0	999999999	11	Private
1832	1	1	1	UK	0	23	46	1	999999999	50	1	1	0	1	4	9	0	1	3	0	999999999	11	Private
1833	1	1	1	UK	0	12	34	0	0	40	1	1	0	0	4	1	0	1	2	Publications, literature or journals	6	11	Private
1834	1	1	1	UK	1	5	28	0	2	40	1	0	0	1	2	0	0	1	1	University or Vet School	7	11	Private
1835	1	1	1	UK	1	28	50	1	2	40	1	0	0	0	9	6	0	1	3	0	999999999	11	Private
1836	1	1	1	UK	1	10	32	1	1	50	1	0	0	0	1	4	0	1	2	0	999999999	11	Private
1837	1	1	1	UK	1	2	29	1	0	400	1	0	0	0	2	6	0	1	1	University or Vet School	7	11	Private
1838	1	1	1	UK	1	1	23	0	2	20	1	1	0	0	1	9	0	1	1	University or Vet School	7	11	Private
1839	1	1	1	UK	1	10	34	1	0	50	1	0	0	0	1	3	0	1	2	0	999999999	11	Private
1840	1	1	1	UK	1	8	31	1	0	250	1	0	0	1	4	6	0	1	2	Publications, literature or journals	6	11	Private
1841	1	1	1	UK	1	8	31	0	0	40	1	0	0	2	0	9	0	1	2	0	999999999	11	Charity
1842	1	1	1	UK	1	8	31	0	0	30	1	0	0	0	4	2	0	1	2	University or Vet School	7	11	Private
1843	1	1	1	UK	0	3	27	0	2	40	0	1	0	2	0	9	0	1	1	University or Vet School	7	11	Private
1844	1	1	1	UK	0	3	25	0	0	999999999	0	0	0	999999999	999999999	999999999	0	1	1	Publications, literature or journals	6	11	Private
1845	1	1	1	UK	0	22	45	1	0	100	1	0	0	1	4	9	0	1	3	Publications, literature or journals	6	11	Private
1846	1	1	1	UK	0	37	60	1	0	62	1	0	0	1	0	4	0	1	3	Ubiquitous or various and multiple sources	1	11	Private
1847	0	1	1	UK	1	11	35	1	0	35	1	1	0	1	4	0	0	1	2	University or Vet School	7	11	Path
1848	1	1	1	UK	0	9	32	1	0	100	1	0	0	1	4	6	0	1	2	0	999999999	11	Private
1849	1	1	1	UK	1	7	29	0	2	35	1	1	0	1	0	7	0	1	1	University or Vet School	7	11	Other
1850	1	1	1	UK	0	31	53	0	0	40	1	0	0	0	3	1	0	1	3	0	999999999	11	Private
1851	1	1	1	UK	1	3	26	0	0	40	1	0	0	0	2	5	0	1	1	0	999999999	11	Private
1852	1	1	1	UK	1	8	32	0	0	999999999	1	0	0	0	9	2	0	1	2	0	999999999	11	Private
1853	1	1	1	UK	0	44	67	0	0	999999999	1	0	0	0	1	5	0	1	3	Colleague or friend	5	11	Private
1854	1	1	1	UK	0	19	43	0	0	35	1	0	0	2	4	7	0	1	2	Publications, literature or journals	6	11	Private
1855	1	1	1	UK	1	5	27	1	0	60	1	1	0	0	2	3	0	1	1	0	999999999	11	Private
1856	1	1	1	UK	1	8	33	1	0	60	1	0	0	0	1	9	0	1	2	University or Vet School	7	11	Private
1857	1	1	1	UK	1	12	34	0	0	35	1	1	1	1	4	0	0	1	2	Veterinary Association	5	11	Private
1858	0	1	1	UK	0	40	62	1	0	136	1	0	0	4	1	0	0	1	3	Publications, literature or journals	6	11	Industry
1859	1	1	1	UK	1	5	28	0	0	50	1	0	0	0	2	4	0	1	1	PG or specialist study or personal research	4	11	Private
1860	1	1	1	UK	0	6	28	0	999999999	250	0	1	0	0	6	9	0	1	1	University or Vet School	7	11	Private
1861	1	1	1	UK	1	23	53	1	999999999	30	1	0	0	1	7	9	0	1	3	0	999999999	11	Private
1862	1	1	1	UK	1	7	30	1	0	150	1	1	0	0	6	4	0	1	1	0	999999999	11	Private
1863	1	1	1	UK	1	16	40	0	2	50	1	0	0	0	9	8	0	1	2	Publications, literature or journals	6	11	Private
1864	1	1	1	UK	0	22	46	0	1	35	1	0	0	0	1	999999999	0	1	3	Publications, literature or journals	6	11	Private
1865	1	1	1	UK	1	15	38	0	0	45	0	1	0	0	2	3	0	1	2	Publications, literature or journals	6	11	Private
1866	0	1	1	UK	0	40	63	0	0	50	1	0	0	0	3	2	0	1	3	CPD, Conferences, meetings, seminars or lectures	2	11	Other
1867	1	1	1	UK	1	22	46	1	0	40	1	1	0	1	0	4	0	1	3	Publications, literature or journals	6	11	Charity
1868	1	1	1	UK	1	6	28	1	1	40	1	1	0	0	9	1	0	1	1	University or Vet School	7	11	Private
1869	1	1	1	UK	1	6	29	0	0	35	1	1	0	0	1	5	0	1	1	University or Vet School	7	11	Private
1870	1	1	1	UK	0	42	66	1	0	24	1	0	0	5	0	8	0	1	3	Publications, literature or journals	6	11	Private
1871	1	1	1	UK	1	16	42	0	0	30	1	0	0	2	9	1	0	1	2	0	999999999	11	Private
1872	0	1	1	UK	1	4	29	1	2	40	0	1	0	2	2	7	0	0	1	0	999999999	11	Private
1873	1	1	1	UK	1	27	48	1	0	40	0	1	0	1	5	0	0	1	3	Publications, literature or journals	6	11	Private
1874	1	1	1	UK	1	4	27	0	1	999999999	0	1	1	999999999	999999999	999999999	0	1	1	0	999999999	11	Research
1875	1	1	1	UK	0	25	47	0	0	50	0	1	0	0	2	6	0	1	3	University or Vet School	7	11	Private
1876	1	1	1	UK	1	24	47	1	2	40	1	1	0	0	6	2	0	1	3	University or Vet School	7	11	Private
1877	1	1	1	UK	0	26	48	1	0	30	1	1	0	6	3	7	0	1	3	General veterinary or professional knowledge or verbal unknown	5	11	Private
1878	1	1	1	UK	1	8	31	0	0	35	1	0	0	0	2	7	0	0	2	0	999999999	11	Private
1879	1	1	1	UK	1	8	32	0	2	36	0	1	0	0	1	9	0	0	2	0	999999999	11	Private
1880	1	1	1	UK	1	8	31	1	999999999	100	1	0	0	9	0	2	0	1	2	Work place or I teach it	4	11	PrivateUniResearch
1881	1	1	1	UK	1	4	35	1	0	999999999	1	1	1	9	2	5	0	1	1	University or Vet School	7	11	PrivateBreak
1882	1	1	1	UK	0	1	26	1	0	40	1	1	0	0	1	5	0	1	1	University or Vet School	7	11	Private
1883	1	1	1	UK	1	4	27	1	0	40	1	0	0	0	1	6	0	1	1	0	999999999	11	Private
1884	1	1	1	UK	1	7	29	0	0	30	0	1	0	2	1	0	0	0	1	0	999999999	11	Private
1885	0	1	1	UK	1	19	46	1	1	100	1	1	1	1	4	0	0	1	2	0	999999999	11	UniResearchIndustry
1886	1	1	1	UK	1	1	23	0	2	36	1	1	0	0	1	5	0	1	1	0	999999999	11	Private
1888	1	1	1	UK	1	26	49	1	0	100	1	1	0	4	1	6	0	1	3	Colleague or friend	5	11	Uni
1889	0	1	1	UK	1	7	29	0	0	100	1	0	0	0	1	4	0	1	1	University or Vet School	7	11	UniPath
1890	1	1	1	UK	1	6	29	1	0	100	1	1	0	9	0	1	0	1	1	Veterinary Association	5	11	UniResearch
1891	1	1	1	UK	1	11	34	1	0	72	1	0	0	4	6	9	0	1	2	Publications, literature or journals	6	11	PrivateResearch
1892	0	1	1	UK	1	12	34	1	0	60	1	1	0	1	4	5	0	1	2	Work place or I teach it	4	11	Uni
1893	0	1	1	UK	0	6	29	1	0	70	0	0	1	0	1	4	0	1	1	University or Vet School	7	11	Research
1894	1	1	1	UK	1	15	40	1	1	140	1	1	1	1	4	10	0	1	2	Work place or I teach it	4	11	UniResearch
1895	0	1	1	UK	0	7	30	1	1	60	1	1	1	1	6	0	0	1	1	0	999999999	11	Research
1896	1	1	1	UK	0	10	33	1	0	50	1	1	0	0	4	6	0	1	2	0	999999999	11	UniResearch
1897	1	1	1	UK	0	17	42	1	0	70	1	1	0	1	4	9	0	1	2	0	999999999	11	Uni
1898	1	1	1	UK	0	10	35	1	0	70	1	1	1	999999999	999999999	999999999	0	1	2	Commercial pharmaceutical or nutrition company	5	11	PrivateCharity
1899	1	1	1	UK	1	17	42	1	0	50	1	0	0	1	0	0	0	1	2	0	999999999	11	UniResearch
1900	1	1	1	UK	0	4	28	0	0	50	1	1	0	1	4	0	0	1	1	University or Vet School	7	11	Uni
1901	1	1	1	UK	1	13	36	1	0	100	1	1	0	1	4	6	0	1	2	CPD, Conferences, meetings, seminars or lectures	2	11	Uni
1902	0	1	1	UK	1	7	31	1	0	36	1	1	0	1	4	6	0	1	1	University or Vet School	7	11	Research
1903	1	1	1	UK	0	4	27	1	2	30	1	0	0	0	1	6	0	1	1	0	999999999	11	Charity
1904	1	1	1	UK	0	27	51	1	1	70	1	1	0	0	1	3	0	1	3	University or Vet School	7	11	UniResearch
1905	1	1	1	UK	1	11	34	0	2	50	1	1	0	0	2	5	0	1	2	0	999999999	11	Charity
1906	0	1	1	UK	0	18	42	1	999999999	30	1	1	0	1	1	0	0	1	2	0	999999999	11	UniResearch
1907	1	1	1	UK	1	27	50	1	0	50	1	0	0	1	4	6	0	1	3	Don't know	1	11	Uni
1908	0	1	1	UK	0	6	31	1	2	29	1	0	0	4	2	6	0	1	1	0	999999999	11	Research
1909	1	1	1	UK	1	10	44	1	0	200	1	0	0	1	9	0	0	1	2	0	999999999	11	Uni
1911	1	1	1	UK	1	8	32	1	2	30	1	1	0	1	0	2	0	1	2	Publications, literature or journals	6	11	UniResearch
1912	1	1	1	UK	1	27	48	0	0	3545	1	0	0	1	0	6	0	0	3	0	999999999	11	Private
1913	1	1	1	UK	1	5	27	0	0	40	1	0	0	2	8	9	0	1	1	University or Vet School	7	11	Private
1914	0	1	1	UK	1	16	40	1	2	50	1	1	0	0	1	6	0	1	2	0	999999999	11	UniGovPath
1915	0	1	1	UK	0	7	30	1	0	300	1	0	0	6	0	4	0	1	1	University or Vet School	7	11	Uni
1916	1	1	1	UK	0	21	47	1	0	40	1	0	0	4	0	2	0	1	2	Work place or I teach it	4	11	PrivateUniCharity
1917	0	1	1	UK	1	5	29	0	1	200	1	1	0	9	4	1	0	1	1	University or Vet School	7	11	UniResearch
1918	1	1	1	UK	1	2	25	0	1	50	1	1	0	0	9	1	0	1	1	University or Vet School	7	11	Private
1919	1	1	1	UK	1	10	37	1	0	100	0	1	1	2	4	6	0	1	2	0	999999999	11	Uni
1920	1	1	1	UK	0	14	42	1	0	40	1	1	0	0	4	2	0	1	2	0	999999999	11	Private
1921	1	1	1	UK	0	9	32	1	0	50	1	0	0	0	4	6	0	1	2	University or Vet School	7	11	Private
1922	0	1	1	UK	1	11	33	1	0	100	1	1	0	4	0	5	0	1	2	0	999999999	11	Research
1923	1	1	1	UK	0	9	32	1	0	100	0	1	0	4	1	9	0	1	2	Publications, literature or journals	6	11	PrivateResearch
1924	1	1	1	UK	0	29	52	1	2	40	1	0	0	0	1	5	0	1	3	0	999999999	11	Private
1925	1	1	1	UK	1	31	53	1	0	40	1	0	0	0	2	3	0	1	3	Another discipline e.g. human medicine or science	1	11	Private
1926	0	1	1	UK	1	11	34	1	0	40	1	1	0	1	0	2	0	1	2	0	999999999	11	Research
1927	1	1	1	UK	0	15	37	1	0	45	1	0	0	0	5	0	0	1	2	Ubiquitous or various and multiple sources	1	11	Private
1928	0	1	1	UK	1	8	31	0	0	999999999	1	1	0	0	1	9	0	1	2	0	999999999	11	Industry
1929	1	1	1	UK	1	3	26	0	0	40	1	0	0	0	1	9	0	1	1	University or Vet School	7	11	Private
1930	0	1	1	UK	1	10	34	1	0	50	1	0	0	1	0	5	0	1	2	0	999999999	11	Industry
1931	1	1	1	UK	0	11	34	1	0	50	1	0	0	1	9	4	0	1	2	CPD, Conferences, meetings, seminars or lectures	2	11	Charity
1932	1	1	1	UK	1	8	31	0	0	35	0	1	0	2	0	7	0	1	2	0	999999999	11	Other
1933	1	1	1	UK	1	7	31	0	0	20	1	0	0	1	2	3	0	1	1	0	999999999	11	Private
1934	1	1	1	UK	1	9	31	1	0	50	1	1	0	0	4	2	0	1	2	University or Vet School	7	11	Charity
1935	1	1	1	UK	1	5	28	0	2	40	1	1	0	3	2	7	0	1	1	University or Vet School	7	11	Private
1936	1	1	1	UK	1	4	26	0	0	70	0	1	0	1	2	0	0	1	1	Publications, literature or journals	6	11	Private
1937	1	1	1	UK	0	5	28	1	1	100	1	1	0	0	4	6	0	1	1	University or Vet School	7	11	Private
1938	1	1	1	UK	1	13	36	1	0	40	1	0	0	9	0	4	0	1	2	University or Vet School	7	11	Private
1939	1	1	1	UK	1	7	31	0	0	45	1	1	0	0	7	5	0	1	1	0	999999999	11	Charity
1940	1	1	1	UK	1	6	30	0	999999999	6	0	1	0	0	2	999999999	0	1	1	PG or specialist study or personal research	4	11	Uni
1941	1	1	1	UK	0	6	30	0	0	150	1	1	0	2	0	3	0	1	1	0	999999999	11	Charity
1943	0	1	1	UK	0	7	31	0	0	20	1	0	0	2	0	1	0	0	1	0	999999999	11	Public
1944	1	1	1	UK	1	8	31	0	0	180	1	1	0	0	2	6	0	1	2	0	999999999	11	Private
1945	1	1	1	UK	1	19	43	0	1	35	1	1	0	2	0	5	0	1	2	CPD, Conferences, meetings, seminars or lectures	2	11	Private
1946	1	1	1	UK	1	3	26	0	0	40	1	1	0	0	1	5	0	1	1	0	999999999	11	Private
1947	1	1	1	UK	1	1	24	1	0	999999999	1	0	0	0	1	9	0	1	1	University or Vet School	7	11	Private
1948	1	1	1	UK	0	14	36	1	0	35	1	0	0	1	5	3	0	1	2	0	999999999	11	Private
1949	1	1	1	UK	1	8	31	1	0	35	1	0	0	0	1	8	0	1	2	University or Vet School	7	11	Private
1950	1	1	1	UK	0	7	31	0	2	40	1	1	0	9	0	10	0	1	1	0	999999999	11	Private
1951	1	1	1	UK	0	27	50	0	0	80	1	1	0	0	6	4	0	1	3	Publications, literature or journals	6	11	Private
1952	1	1	1	UK	1	33	55	0	1	35	0	1	0	0	2	9	0	1	3	University or Vet School	7	11	PrivateCharity
1953	1	1	1	UK	1	12	37	0	0	35	1	0	0	0	1	3	0	1	2	Work place or I teach it	4	11	Private
1954	1	1	1	UK	0	12	41	1	0	50	1	1	0	0	9	4	0	1	2	Publications, literature or journals	6	11	Private
1955	1	1	1	UK	0	30	52	1	0	35	1	0	0	0	2	3	0	1	3	0	999999999	11	Private
1956	1	1	1	UK	0	19	40	0	0	40	1	0	0	0	2	3	0	1	2	Publications, literature or journals	6	11	Private
1957	1	1	1	UK	1	5	27	0	0	30	1	1	0	0	1	3	0	1	1	University or Vet School	7	11	Private
1958	1	1	1	UK	1	21	47	1	2	30	0	1	0	0	2	1	0	0	2	0	999999999	11	Private
1959	1	1	1	UK	0	5	30	1	1	50	1	1	0	0	6	9	0	1	1	University or Vet School	7	11	Private
1961	1	1	1	UK	1	22	46	0	0	45	1	1	0	2	5	9	0	1	3	CPD, Conferences, meetings, seminars or lectures	2	11	Private
1962	1	1	1	UK	0	14	37	0	0	90	1	0	0	4	0	6	0	0	2	0	999999999	11	Private
1963	1	1	1	UK	1	4	28	0	0	37	1	0	1	0	1	4	0	1	1	Publications, literature or journals	6	11	PrivateCharity
1964	1	1	1	UK	0	9	32	0	1	40	1	1	0	0	1	2	0	1	2	0	999999999	11	Private
1965	1	1	1	UK	0	13	40	0	0	40	1	0	0	0	0	10	0	1	2	0	999999999	11	Private
1966	1	1	1	UK	0	10	33	0	0	30	1	0	0	0	2	1	0	0	2	0	999999999	11	Private
1967	1	1	1	UK	0	1	24	0	1	999999999	1	0	0	9	0	1	0	1	1	0	999999999	11	Private
1968	1	1	1	UK	1	4	33	1	0	45	1	1	0	0	1	9	0	1	1	University or Vet School	7	11	Private
1969	1	1	1	UK	0	36	59	1	1	20	1	0	0	0	1	4	0	1	3	CPD, Conferences, meetings, seminars or lectures	2	11	Private
1970	1	1	1	UK	0	33	55	1	2	40	1	1	0	1	4	6	0	1	3	Don't know	1	11	PrivateCharity
1971	1	1	1	UK	1	7	30	0	0	40	1	0	0	1	0	2	0	1	1	University or Vet School	7	11	Private
1972	1	1	1	UK	1	21	43	1	2	40	1	0	0	0	9	1	0	1	2	0	999999999	11	Private
1973	1	1	1	UK	0	14	38	0	0	10	0	1	0	0	4	5	0	1	2	CPD, Conferences, meetings, seminars or lectures	2	11	Private
1974	1	1	1	UK	1	48	70	0	2	30	1	0	0	5	0	8	0	0	3	0	999999999	11	Private
1975	1	1	1	UK	1	22	45	1	0	100	1	0	0	0	2	4	0	1	3	Don't know	1	11	Private
1976	1	1	1	UK	0	37	60	1	0	70	0	1	0	1	5	3	0	1	3	Publications, literature or journals	6	11	Private
1977	0	1	1	UK	0	999999999	53	1	1	50	0	1	0	5	7	0	0	1	999999999	Publications, literature or journals	6	11	Other
1978	1	1	1	UK	1	2	25	1	0	35	1	1	0	1	0	2	0	1	1	University or Vet School	7	11	Private
1979	1	1	1	UK	1	1	24	0	1	999999999	1	0	0	0	2	4	0	1	1	0	999999999	11	Private
1980	1	1	1	UK	0	4	27	1	1	45	1	1	0	1	0	10	0	1	1	University or Vet School	7	11	Private
1981	1	1	1	UK	0	17	40	1	0	40	1	0	0	1	4	7	0	1	2	CPD, Conferences, meetings, seminars or lectures	2	11	Private
1982	1	1	1	UK	1	999999999	25	0	2	35	1	1	0	0	4	1	0	1	999999999	0	999999999	11	Private
1983	1	1	1	UK	1	19	42	0	0	41	1	0	0	0	1	2	0	1	2	Publications, literature or journals	6	11	Private
1984	1	1	1	UK	1	10	34	1	0	35	1	1	0	0	9	3	0	1	2	0	999999999	11	Private
1985	1	1	1	UK	1	18	40	0	0	50	1	1	1	0	9	2	0	0	2	0	999999999	11	Private
1987	1	1	1	UK	0	19	36	0	1	23	1	0	0	0	5	9	0	1	2	Don't know	1	11	Private
1988	1	1	1	UK	0	5	28	1	1	999999999	1	0	0	0	6	8	0	1	1	0	999999999	11	Private
1989	1	1	1	UK	0	29	52	1	999999999	35	0	1	0	0	1	5	0	1	3	0	999999999	11	Charity
1990	1	1	1	UK	1	23	44	0	0	40	1	1	0	0	2	9	0	1	3	PG or specialist study or personal research	4	11	Private
1991	1	1	1	UK	1	11	37	0	0	18	1	0	0	0	3	4	0	0	2	0	999999999	11	Private
1992	1	1	1	UK	1	8	33	1	0	35	1	1	0	0	2	7	0	1	2	University or Vet School	7	11	Private
1993	0	1	1	UK	0	39	62	0	0	30	1	0	0	10	0	5	0	1	3	Publications, literature or journals	6	11	Gov
1994	1	1	1	UK	0	8	31	0	0	50	1	0	0	0	1	2	0	1	2	CPD, Conferences, meetings, seminars or lectures	2	11	Private
1995	1	1	1	UK	0	8	31	1	0	300	0	1	0	6	5	4	0	1	2	Publications, literature or journals	6	11	Private
1996	1	1	1	UK	0	23	49	0	0	40	1	0	0	0	4	2	0	1	3	0	999999999	11	Private
1997	1	1	1	UK	0	28	50	0	0	30	0	1	0	0	1	2	0	1	3	Publications, literature or journals	6	11	Private
1998	0	1	1	UK	1	6	999999999	0	0	35	1	0	0	0	9	5	0	0	1	0	999999999	11	Public
1999	1	1	1	UK	1	13	35	1	1	36	1	0	0	0	5	8	0	1	2	Publications, literature or journals	6	11	Private
2000	1	1	1	UK	1	3	25	0	1	25	1	1	0	0	1	999999999	0	1	1	0	999999999	11	Private
2001	1	1	1	UK	1	5	26	0	0	100	1	1	0	8	0	1	0	0	1	0	999999999	11	Private
2002	1	1	1	UK	0	6	30	1	1	40	1	0	0	1	0	0	0	1	1	0	999999999	11	Private
2003	1	1	1	UK	1	4	28	1	0	50	0	1	0	0	2	2	0	0	1	0	999999999	11	Private
2004	1	1	1	UK	1	10	35	1	0	80	1	1	0	1	0	4	0	1	2	University or Vet School	7	11	Private
2005	1	1	1	UK	1	12	36	1	0	35	1	1	0	0	1	4	0	1	2	PG or specialist study or personal research	4	11	Private
2006	1	1	1	UK	0	10	36	0	0	60	0	1	0	1	4	999999999	0	1	2	0	999999999	11	Private
2007	1	1	1	UK	1	10	35	1	1	60	1	1	0	6	4	1	0	1	2	University or Vet School	7	11	Private
2008	1	1	1	UK	1	4	27	1	1	245	1	0	0	0	6	9	0	1	1	PG or specialist study or personal research	4	11	Private
2009	1	1	1	UK	1	3	25	0	2	10	1	0	0	0	2	1	0	1	1	0	999999999	11	Private
2010	1	1	1	UK	1	35	57	0	0	40	1	0	0	0	6	2	0	1	3	0	999999999	11	Charity
2011	1	1	1	UK	0	17	45	1	0	75	1	0	0	6	4	1	0	1	2	Publications, literature or journals	6	11	Private
2012	1	1	1	UK	1	7	28	1	0	40	1	1	1	0	3	8	0	1	1	0	999999999	11	Private
2013	1	1	1	UK	1	7	27	0	0	40	1	1	0	9	2	0	0	1	1	University or Vet School	7	11	Private
2014	1	1	1	UK	1	2	27	0	1	20	0	1	0	0	4	9	0	1	1	0	999999999	11	Private
2015	1	1	1	UK	0	21	50	0	0	40	1	1	0	0	3	1	0	1	2	CPD, Conferences, meetings, seminars or lectures	2	11	PrivateCharity
2016	1	1	1	UK	1	2	26	1	1	35	1	1	0	3	10	5	0	1	1	University or Vet School	7	11	Private
2017	1	1	1	UK	1	25	46	0	2	50	1	0	0	0	1	2	0	0	3	0	999999999	11	Private
2018	1	1	1	UK	0	6	30	0	0	36	1	1	0	2	0	9	0	0	1	0	999999999	11	Private
2019	1	1	1	UK	1	9	32	0	2	40	1	1	0	0	2	1	0	1	2	University or Vet School	7	11	Charity
2020	1	1	1	UK	1	3	25	0	2	40	1	0	0	1	0	7	0	1	1	0	999999999	11	Private
2021	1	1	1	UK	1	19	41	1	0	50	1	1	0	1	0	4	0	1	2	CPD, Conferences, meetings, seminars or lectures	2	11	Private
2022	1	1	1	UK	1	7	32	0	0	40	1	0	0	3	2	0	0	1	1	0	999999999	11	Private
2023	1	1	1	UK	0	15	39	1	0	50	1	0	0	0	1	4	0	1	2	Don't know	1	11	Private
2024	1	1	1	UK	0	6	29	0	0	40	1	1	0	0	4	1	0	1	1	University or Vet School	7	11	Charity
2025	1	1	1	UK	0	10	36	0	0	90	1	1	0	1	0	5	0	1	2	CPD, Conferences, meetings, seminars or lectures	2	11	Private
2026	1	1	1	UK	0	28	50	1	0	50	1	0	0	0	6	5	0	1	3	Publications, literature or journals	6	11	Private
2027	1	1	1	UK	1	8	31	0	0	60	1	1	1	0	2	1	0	1	2	University or Vet School	7	11	Private
2028	1	1	1	UK	0	8	31	0	1	7	0	1	0	1	0	10	0	1	2	University or Vet School	7	11	Private
2029	1	1	1	UK	0	30	53	1	0	60	1	0	0	0	9	5	0	1	3	0	999999999	11	Private
2030	1	1	1	UK	1	15	40	0	0	40	1	1	0	1	0	2	0	1	2	Publications, literature or journals	6	11	Private
2031	1	1	1	UK	0	26	48	1	1	60	0	1	0	0	1	4	0	1	3	Veterinary Association	5	11	Private
2032	1	1	1	UK	1	3	26	1	1	30	1	1	0	0	4	2	0	1	1	0	999999999	11	Private
2033	1	1	1	UK	1	14	37	1	0	35	0	1	0	2	7	0	0	1	2	University or Vet School	7	11	Private
2034	1	1	1	UK	1	7	30	1	0	400	1	1	1	1	0	4	0	1	1	University or Vet School	7	11	PrivateUni
2035	1	1	1	UK	0	7	33	0	0	95	0	0	1	0	8	9	0	1	1	General veterinary or professional knowledge or verbal unknown	5	11	Private
2036	1	1	1	UK	0	7	30	1	0	10	0	1	1	2	1	0	0	0	1	0	999999999	11	Private
2037	1	1	1	UK	0	40	62	0	0	50	1	1	0	0	4	6	0	1	3	Work place or I teach it	4	11	Private
2038	1	1	1	UK	0	37	59	0	2	40	1	1	0	4	3	0	0	1	3	Publications, literature or journals	6	11	Private
2039	1	1	1	UK	1	2	27	1	1	40	1	0	0	0	1	6	0	1	1	0	999999999	11	Private
2040	1	1	1	UK	0	10	34	1	0	35	1	1	1	0	1	7	0	1	2	0	999999999	11	Private
2041	1	1	1	UK	0	20	45	1	0	35	1	0	0	0	1	4	0	1	2	CPD, Conferences, meetings, seminars or lectures	2	11	Private
2042	1	1	1	UK	1	4	31	1	0	40	1	1	0	2	0	5	0	0	1	0	999999999	11	Private
2043	1	1	1	UK	1	1	26	0	0	50	1	1	0	1	0	4	0	1	1	University or Vet School	7	11	Private
2044	0	1	1	UK	1	4	28	1	0	999999999	0	0	0	999999999	999999999	999999999	0	0	1	0	999999999	11	Other
2045	1	1	1	UK	0	6	30	1	0	50	1	1	0	0	1	4	0	1	1	University or Vet School	7	11	Private
2046	1	1	1	UK	0	31	53	1	0	100	1	1	0	4	1	7	0	1	3	0	999999999	11	Private
2047	1	1	1	UK	1	10	33	1	0	40	1	0	0	0	1	6	0	1	2	0	999999999	11	Private
2048	1	1	1	UK	0	12	43	0	0	40	1	0	0	0	1	5	0	1	2	Blank or invalid answer	1	11	Private
2049	1	1	1	UK	0	29	51	0	1	50	1	0	0	0	4	1	0	1	3	Publications, literature or journals	6	11	Private
2050	1	1	1	UK	0	23	48	1	0	40	1	0	0	0	4	5	0	1	3	Publications, literature or journals	6	11	Private
2051	1	1	1	UK	1	27	50	1	0	100	1	0	0	4	0	9	0	1	3	Publications, literature or journals	6	11	Private
2052	1	1	1	UK	1	1	24	0	0	999999999	1	0	0	0	5	9	0	1	1	Work place or I teach it	4	11	Uni
2053	1	1	1	UK	1	31	53	0	0	40	1	0	0	6	0	1	0	1	3	0	999999999	11	Private
2054	0	1	1	UK	0	45	67	1	0	80	1	1	0	1	7	4	0	1	3	Colleague or friend	5	11	Other
2055	1	1	1	UK	1	8	31	1	0	50	1	1	0	0	1	9	0	1	2	University or Vet School	7	11	Private
2056	1	1	1	UK	1	2	25	0	0	28	1	0	0	0	2	4	0	1	1	University or Vet School	7	11	Private
2057	1	1	1	UK	1	23	48	1	0	50	0	1	0	0	4	8	0	1	3	CPD, Conferences, meetings, seminars or lectures	2	11	Private
2058	1	1	1	UK	1	17	40	1	0	20	1	1	0	0	2	1	0	1	2	PG or specialist study or personal research	4	11	Private
2059	1	1	1	UK	1	35	57	0	2	30	0	1	0	0	5	6	0	1	3	Publications, literature or journals	6	11	Private
2060	1	1	1	UK	1	4	28	1	2	35	1	0	0	1	0	2	0	1	1	0	999999999	11	Private
2061	1	1	1	UK	1	3	26	0	2	35	1	0	0	9	0	1	0	1	1	0	999999999	11	Private
2062	1	1	1	UK	0	29	53	0	0	38	1	0	0	0	1	9	0	1	3	Colleague or friend	5	11	Private
2063	1	1	1	UK	1	2	24	0	2	20	1	1	0	0	2	3	0	1	1	University or Vet School	7	11	Private
2064	1	1	1	UK	0	33	56	0	2	20	1	0	0	0	5	9	0	1	3	Publications, literature or journals	6	11	Private
2065	1	1	1	UK	1	8	31	1	0	100	1	0	0	0	4	6	0	1	2	0	999999999	11	Private
2066	1	1	1	UK	1	9	33	1	0	50	1	1	0	0	9	2	0	1	2	University or Vet School	7	11	Private
2067	1	1	1	UK	1	26	48	0	0	35	1	1	0	0	5	9	0	1	3	CPD, Conferences, meetings, seminars or lectures	2	11	Private
2068	1	1	1	UK	0	19	42	0	0	28	1	0	0	0	4	9	0	1	2	RCVS standards or practice audit	5	11	Private
2069	1	1	1	UK	1	32	55	0	0	40	0	1	0	0	1	2	0	1	3	CPD, Conferences, meetings, seminars or lectures	2	11	Private
2070	1	1	1	UK	0	5	29	0	2	40	1	1	0	0	9	5	0	1	1	0	999999999	11	Private
2071	1	1	1	UK	0	3	29	1	0	45	1	0	0	0	4	2	0	1	1	University or Vet School	7	11	Private
2072	1	1	1	UK	1	9	31	1	0	75	1	1	0	0	3	9	0	1	2	Ubiquitous or various and multiple sources	1	11	Private
2073	1	1	1	UK	0	25	49	0	0	999999999	0	0	0	999999999	999999999	999999999	0	1	3	University or Vet School	7	11	Private
2074	1	1	1	UK	1	3	26	0	0	30	1	0	0	0	6	2	0	1	1	0	999999999	11	Private
2075	0	1	1	UK	1	43	67	1	1	25	0	1	0	1	0	4	0	1	3	Publications, literature or journals	6	11	Private
2076	1	1	1	UK	1	22	45	0	0	40	0	1	0	0	9	3	0	1	3	General veterinary or professional knowledge or verbal unknown	5	11	Private
2077	1	1	1	UK	1	16	38	0	0	30	1	0	0	0	5	9	0	1	2	0	999999999	11	Private
2078	0	1	1	UK	0	23	46	1	0	60	1	1	0	1	4	7	0	1	3	Work place or I teach it	4	11	Gov
2079	1	1	1	UK	1	13	36	0	0	35	1	0	0	0	2	1	0	1	2	University or Vet School	7	11	PrivateCharity
2080	1	1	1	UK	0	42	65	0	0	20	0	1	0	0	6	7	0	1	3	0	999999999	11	PrivateCharity
2081	1	1	1	UK	0	46	68	1	0	50	0	1	0	1	4	6	0	1	3	CPD, Conferences, meetings, seminars or lectures	2	11	Private
2082	1	1	1	UK	0	22	44	0	0	35	1	0	0	0	3	9	0	1	3	Publications, literature or journals	6	11	Private
2083	1	1	1	UK	0	30	52	0	1	50	1	0	0	0	1	5	0	1	3	0	999999999	11	PrivateGov
2084	1	1	1	UK	1	12	34	1	999999999	45	1	0	0	1	0	2	0	1	2	University or Vet School	7	11	Private
2085	1	1	1	UK	1	11	39	1	0	30	0	1	0	2	9	8	0	1	2	0	999999999	11	Private
2086	1	1	1	UK	1	13	51	1	999999999	30	0	1	0	2	0	1	0	1	2	0	999999999	11	Private
2087	1	1	1	UK	1	5	25	0	0	35	1	1	0	1	0	9	0	0	1	0	999999999	11	Private
2088	0	1	1	UK	0	9	33	1	1	999999999	0	0	0	999999999	999999999	999999999	0	1	2	University or Vet School	7	11	Research
2089	1	1	1	UK	0	36	60	1	0	45	1	1	0	0	2	9	0	1	3	General veterinary or professional knowledge or verbal unknown	5	11	Private
2090	1	1	1	UK	0	9	31	0	0	40	0	1	0	3	4	1	0	1	2	University or Vet School	7	11	Private
2091	1	1	1	UK	1	11	34	0	0	40	1	1	0	0	9	4	0	1	2	Publications, literature or journals	6	11	Private
2092	1	1	1	UK	1	6	44	0	0	50	1	1	0	0	1	2	0	0	1	0	999999999	11	Private
2093	1	1	1	UK	0	21	44	1	0	45	0	1	0	1	0	4	0	1	2	0	999999999	11	Private
2094	1	1	1	UK	0	28	49	0	0	35	1	0	0	0	1	9	0	1	3	0	999999999	11	Private
2095	1	1	1	UK	1	4	26	0	0	30	1	1	0	2	0	3	0	1	1	0	999999999	11	Private
2096	1	1	1	UK	1	24	46	1	0	999999999	0	1	0	4	10	6	0	1	3	Another discipline e.g. human medicine or science	1	11	Private
2097	1	1	1	UK	0	30	53	0	1	200	1	1	0	4	0	7	0	1	3	Don't know	1	11	Private
2098	1	1	1	UK	0	30	52	1	0	150	1	1	1	1	0	4	0	1	3	Another discipline e.g. human medicine or science	1	11	PrivateOther
2099	0	1	1	UK	0	32	54	1	2	100	0	0	1	0	1	4	0	0	3	0	999999999	11	Industry
2100	1	1	1	UK	1	3	27	0	0	999999999	0	0	0	999999999	999999999	999999999	0	1	1	University or Vet School	7	11	Private
2101	1	1	1	UK	1	10	35	0	0	100	0	1	0	0	1	4	0	1	2	0	999999999	11	Private
2102	1	1	1	UK	0	37	59	1	0	100	1	0	0	0	6	1	0	0	3	0	999999999	11	Industry
2103	0	1	1	UK	1	26	49	1	0	40	1	1	0	0	1	4	0	1	3	CPD, Conferences, meetings, seminars or lectures	2	11	Industry
2104	1	1	1	UK	0	37	60	1	0	5	1	0	0	4	7	4	0	0	3	0	999999999	11	Private
2105	1	1	1	UK	1	8	32	1	1	100	1	1	0	0	1	2	0	1	2	PG or specialist study or personal research	4	11	Private
2106	1	1	1	UK	1	2	25	0	0	40	1	1	0	0	1	8	0	1	1	University or Vet School	7	11	Private
2107	1	1	1	UK	0	11	39	0	0	35	0	1	0	2	7	6	0	1	2	Publications, literature or journals	6	11	Private
2108	1	1	1	UK	1	29	52	0	0	40	1	0	0	0	4	1	0	1	3	PG or specialist study or personal research	4	11	Private
2109	1	1	1	UK	1	37	60	0	0	40	1	1	0	0	2	4	0	1	3	Publications, literature or journals	6	11	Private
2110	1	1	1	UK	1	31	51	0	2	40	1	1	0	0	3	9	0	1	3	0	999999999	11	Private
2111	1	1	1	UK	1	3	26	0	999999999	40	0	1	0	3	2	0	0	1	1	University or Vet School	7	11	Private
[truncated: 4,311 more rows]

## Sheet: Key
New name	Key
ConsecID	Unique ID for each respondent in merged UK and international dataset, in ascending numerical order
clinician	Respondent does some clinical work, no=0, yes=1
workdeveloped	Development status of respondent's country of work, Developing (IMFcategories Upper middle, Middle, Lower middle, Low) =0, Developed (IMF High income countries) =1,
workinuk	Respondent works in UK, no=0, yes=1
countryofwork	Country of work of respondent. N.B. countries with less than five respondents have been coded as "CountryAnonymised", to protect respondent anonymity.
gender	Male=0, Female =1
yrsgrad	Number of years since graduating as a vet at time of survey
age	Respondent age (yrs)
pgqual	Respondent holds other qualification, no=0, yes=1
findmoreevm	Respondent wants to find more about EVM, no=0, yes =1
hourscpd	Number of hours of CPD undertaken per year
paycpdprac	Practice pays for some CPD; no=0, yes=1
paycpdmyself	Respondent pays for some CPD; no=0, yes=2
paycpdoth	Other source pays for some CPD; no=0, yes=3
firstchoicecpdmeth	First preferred method of respondent for receiving CPD
secchoicecpdmeth	Second preferred method of respondent for receiving CPD
thirdchoicecpdmeth	First preferred method of respondent for receiving CPD
questionnaire	Questionnaire that respondent participated in; UK=0, international=1
heardEVM	Respondent has heard of EVM: yes=0, no=1
yrsgradcat	Category of number of years respondent had been graduated: <8 yrs=1, 8-22yrs=2, >22yrs=3
whereheardevm_origincats	Original coded categories for where respondent had heard of EVM before merging categories
whereheardevm_mergedcats	Code for where respondent had heard of EVM after merging categories from field "whereheardevm_origincats" (see below, codes 1-7)
		1=Other (consists of categories: Don’t know; Ubiquitous; Heard via another (non-veterinary) discipline; Public debate, Blank/invalid
		2=CPD (consists of categories: CPD, conferences, Meetings, seminars or lectures)
		3=Email alerts or other email or forum source (consists of categories: Emails, online forums, electronic newsletters)
		4=PG studies, specialist research or personal interest (consists of categories: PG studies, specialist research or personal interest; Work place or I teach it)
		5=General Veterinary Profession (consists of categories: Veterinary Association, Specialist organization research centre or referral clinic; Commercial pharmaceutical or nutrition company; General veterinary professional knowledge; Verbal unknown, Colleague or a friend)
		6=Literature (consists of categories: Publications, literature or journals)
		7=University or Vet School (consists of categories: University or Vet school)
WhereHeardOfQuestionnaire	Categories of where respondents had heard of Questionnaire:
		1=Direct invitation or CEVM source
		2=Don't know
		3=Electronic vet periodical or forum or nonspecific websource
		4=Email, source not specified
		5=Friend or colleague
		6=Journal or Magazine article or non-specific newsletter
		7=National Veterinary Association or board
		8=Other
		9=Regional, international or discipline focused Vet Association or Society
		10=Social media
		11=UK, RCVS register
		12=Vet school or Research Institute
TypeWorkText	Concatenated types of work that respondent did, comprising of one category, or a combination of categories, from the following :
		Private, Uni, Research, Gov,Path, Charity, Industry, Army, Public, Outside Profession, Break, OtherType.
