# Supplementary material for: The Awareness of the International Veterinary Profession of Evidence-Based Veterinary Medicine and Preferred Methods of Training
Source: PubMed Central journal article supplement (PMC5606622; doi:10.3390/vetsci4010015), 2017-03-08
Supplement: vetsci-04-00015-s001.pdf [file vetsci-04-00015-s001.pdf]

# Supplementary Materials: The Awareness of the International Veterinary Profession of Evidence-Based Veterinary Medicine and Preferred Methods of Training

Selene J. Huntley, Rachel S. Dean and Marnie L. Brennan

**Table S1.** Open and closed questions in evidence-based medicine section of questionnaire.

| Questions Asked                                                                                                                   | Type of Question                | Response Options                    |
|-----------------------------------------------------------------------------------------------------------------------------------|---------------------------------|-------------------------------------|
| <i>Evidence-based Veterinary Medicine Section</i>                                                                                 |                                 |                                     |
| Before participating in this survey, had you heard of the expression “evidence-based veterinary medicine”?                        | Closed                          | 2 options given                     |
| Where did you hear about it?                                                                                                      | Open                            |                                     |
| Would you be interested in finding out more about evidence-based veterinary medicine?                                             | Closed                          | 3 options given                     |
| <i>Sources of Information or Evidence</i>                                                                                         |                                 |                                     |
| Do you undertake any further training for the veterinary work you do, e.g., attending conferences? *                              | Closed                          | 2 options given                     |
| Approximately how many hours of further training do you do every year?                                                            | Open                            |                                     |
| Who pays/finances your training?                                                                                                  | Closed, with an “Other” section | 3 options given (including “Other”) |
| Please indicate which of the following further training methods you would choose as your preferred first, second and third choice | Closed, with an “Other” section | 9 options given (including “Other”) |

\* International questionnaire only; such training is mandatory for veterinarians working in the UK.

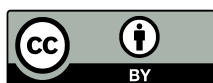

© 2017 by the authors; licensee MDPI, Basel, Switzerland. This article is an open access article distributed under the terms and conditions of the Creative Commons by Attribution (CC-BY) license (<http://creativecommons.org/licenses/by/4.0/>).
